# Supplementary material for: Genomewide Identification of Essential Genes and Fitness Determinants of Streptococcus mutans UA159
Source: PubMed Central journal article supplement (PMC5806208; doi:10.1128/msphere.00031-18), 2018-02-07
Supplement: sph001182474sf2.pdf [file sph001182474sf2.pdf]

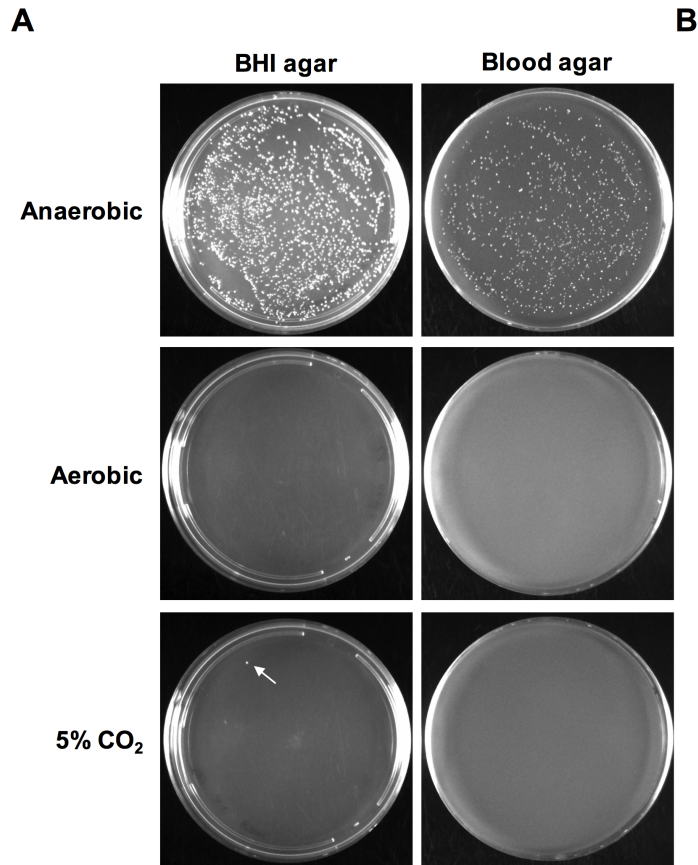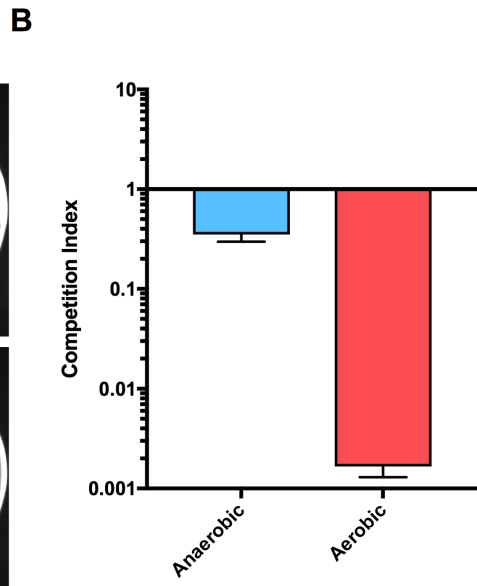

**FIG S2**
