# Supplementary material for: Genomewide Identification of Essential Genes and Fitness Determinants of Streptococcus mutans UA159
Source: PubMed Central journal article supplement (PMC5806208; doi:10.1128/msphere.00031-18), 2018-02-07
Supplement: sph001182474st1.pdf [file sph001182474st1.pdf]

Table S1

| <b>Locus</b>                   | <b>Description</b>                                                       |
|--------------------------------|--------------------------------------------------------------------------|
| <b><i>Duplicated genes</i></b> |                                                                          |
| SMU_1024c                      | putative transposase fragment                                            |
| SMU_106c                       | putative transposase fragment                                            |
| SMU_1347c                      | conserved hypothetical protein; possible permease                        |
| SMU_1348c                      | putative ABC transporter, ATP-binding protein                            |
| SMU_1365c                      | hypothetical protein; possible permease                                  |
| SMU_1366c                      | putative ABC transporter; ATP-binding protein                            |
| SMU_1370c                      | putative transposase, IS150-like                                         |
| SMU_1379                       | Transposase and inactivated derivatives                                  |
| SMU_1380                       | No description                                                           |
| SMU_1407c                      | putative transposase, ISSmu1                                             |
| SMU_1408c                      | conserved hypothetical protein                                           |
| SMU_1505c                      | hypothetical protein                                                     |
| SMU_175                        | hypothetical protein                                                     |
| SMU_1893c                      | putative transposase, ISSmu1                                             |
| SMU_1894c                      | Transposase and inactivated derivatives                                  |
| SMU_1899                       | putative ABC transporter, ATP-binding and permease protein<br>(fragment) |
| SMU_2003                       | Ribosomal protein S13                                                    |
| SMU_285                        | hypothetical protein                                                     |
| SMU_436c                       | putative transposase, ISSmu1                                             |
| SMU_437c                       | No description                                                           |
| SMU_565c                       | putative transposase, ISSmu1                                             |
| SMU_566c                       | No description                                                           |
| SMU_767                        | putative transposase, ISSmu1                                             |
| SMU_875c                       | putative transposase, IS150-like                                         |
| SMU_r07                        | rRNA                                                                     |
| SMU_r08                        | rRNA                                                                     |
| SMU_r09                        | rRNA                                                                     |
| SMU_r10                        | rRNA                                                                     |
| SMU_r11                        | rRNA                                                                     |
| SMU_r12                        | rRNA                                                                     |
| SMU_r13                        | rRNA                                                                     |
| SMU_r14                        | rRNA                                                                     |
| SMU_r15                        | rRNA                                                                     |
| SMU_t43                        | tRNA                                                                     |
| SMU_t45                        | tRNA                                                                     |
| SMU_t47                        | tRNA                                                                     |

|                           |                             |
|---------------------------|-----------------------------|
| <b>SMU_t49</b>            | tRNA                        |
| <b>SMU_t53</b>            | tRNA                        |
| <b>SMU_t55</b>            | tRNA                        |
| <b>SMU_t57</b>            | tRNA                        |
| <b>SMU_t59</b>            | tRNA                        |
| <b><i>Small genes</i></b> |                             |
| <b>SMU_1231c</b>          | hypothetical protein        |
| <b>SMU_1808c</b>          | putative integrase fragment |
| <b>SMU_2053c</b>          | hypothetical protein        |
| <b>SMU_68</b>             | hypothetical protein        |
| <b>SMU_t01</b>            | tRNA                        |
| <b>SMU_t02</b>            | tRNA                        |
| <b>SMU_t03</b>            | tRNA                        |
| <b>SMU_t04</b>            | tRNA                        |
| <b>SMU_t05</b>            | tRNA                        |
| <b>SMU_t06</b>            | tRNA                        |
| <b>SMU_t07</b>            | tRNA                        |
| <b>SMU_t08</b>            | tRNA                        |
| <b>SMU_t09</b>            | tRNA                        |
| <b>SMU_t10</b>            | tRNA                        |
| <b>SMU_t11</b>            | tRNA                        |
| <b>SMU_t12</b>            | tRNA                        |
| <b>SMU_t13</b>            | tRNA                        |
| <b>SMU_t14</b>            | tRNA                        |
| <b>SMU_t15</b>            | tRNA                        |
| <b>SMU_t16</b>            | tRNA                        |
| <b>SMU_t17</b>            | tRNA                        |
| <b>SMU_t18</b>            | tRNA                        |
| <b>SMU_t19</b>            | tRNA                        |
| <b>SMU_t20</b>            | tRNA                        |
| <b>SMU_t21</b>            | tRNA                        |
| <b>SMU_t22</b>            | tRNA                        |
| <b>SMU_t23</b>            | tRNA                        |
| <b>SMU_t24</b>            | tRNA                        |
| <b>SMU_t25</b>            | tRNA                        |
| <b>SMU_t26</b>            | tRNA                        |
| <b>SMU_t27</b>            | tRNA                        |
| <b>SMU_t28</b>            | tRNA                        |
| <b>SMU_t29</b>            | tRNA                        |
| <b>SMU_t30</b>            | tRNA                        |

|                |      |
|----------------|------|
| <b>SMU_t31</b> | tRNA |
| <b>SMU_t32</b> | tRNA |
| <b>SMU_t33</b> | tRNA |
| <b>SMU_t34</b> | tRNA |
| <b>SMU_t35</b> | tRNA |
| <b>SMU_t36</b> | tRNA |
| <b>SMU_t37</b> | tRNA |
| <b>SMU_t38</b> | tRNA |
| <b>SMU_t39</b> | tRNA |
| <b>SMU_t40</b> | tRNA |
| <b>SMU_t41</b> | tRNA |
| <b>SMU_t42</b> | tRNA |
| <b>SMU_t43</b> | tRNA |
| <b>SMU_t44</b> | tRNA |
| <b>SMU_t45</b> | tRNA |
| <b>SMU_t46</b> | tRNA |
| <b>SMU_t47</b> | tRNA |
| <b>SMU_t48</b> | tRNA |
| <b>SMU_t49</b> | tRNA |
| <b>SMU_t50</b> | tRNA |
| <b>SMU_t51</b> | tRNA |
| <b>SMU_t52</b> | tRNA |
| <b>SMU_t53</b> | tRNA |
| <b>SMU_t54</b> | tRNA |
| <b>SMU_t55</b> | tRNA |
| <b>SMU_t56</b> | tRNA |
| <b>SMU_t57</b> | tRNA |
| <b>SMU_t58</b> | tRNA |
| <b>SMU_t59</b> | tRNA |
| <b>SMU_t60</b> | tRNA |
| <b>SMU_t61</b> | tRNA |
| <b>SMU_t62</b> | tRNA |
| <b>SMU_t63</b> | tRNA |
| <b>SMU_t64</b> | tRNA |
| <b>SMU_t65</b> | tRNA |

---
