# Supplementary material for: Genomewide Identification of Essential Genes and Fitness Determinants of Streptococcus mutans UA159
Source: PubMed Central journal article supplement (PMC5806208; doi:10.1128/msphere.00031-18), 2018-02-07
Supplement: sph001182474st2.pdf [file sph001182474st2.pdf]

Table S2

| Locus    | Gene         | Product                                                        | Initial Ratio | BHI Ratio | FMC Ratio | Mouse Ratio |
|----------|--------------|----------------------------------------------------------------|---------------|-----------|-----------|-------------|
| SMU_01   | <i>dnaA</i>  | chromosomal replication initiator protein DnaA                 | 0.001         | 0.001     | 0.001     | 0.013       |
| SMU_02   | <i>dnaN</i>  | DNA polymerase III, beta subunit                               | 0.000         | 0.001     | 0.001     | 0.003       |
| SMU_05   | -            | conserved hypothetical protein                                 | 0.136         | 0.079     | 0.058     | 0.000       |
| SMU_06   | -            | uncharacterized GTP-binding protein                            | 0.243         | 0.021     | 0.061     | 0.001       |
| SMU_07   | <i>pth</i>   | peptidyl-tRNA hydrolase                                        | 0.000         | 0.001     | 0.000     | 0.001       |
| SMU_08   | <i>trcF</i>  | transcription-repair coupling factor                           | 1.671         | 1.577     | 1.274     | 0.008       |
| SMU_09   | -            | small RNA binding protein                                      | 1.164         | 0.920     | 0.995     | 0.001       |
| SMU_10   | <i>divIC</i> | cell-division protein DivIC                                    | 1.703         | 0.153     | 0.042     | 0.005       |
| SMU_100  | <i>sorD</i>  | sorbose PTS system, IIB component                              | 1.800         | 0.828     | 1.276     | 0.002       |
| SMU_1000 | -            | hypothetical protein                                           | 0.012         | 0.010     | 0.000     | 0.000       |
| SMU_1001 | <i>dprA</i>  | DNA processing protein, Smf family                             | 0.858         | 0.745     | 0.606     | 0.000       |
| SMU_1002 | <i>topA</i>  | DNA topoisomerase I                                            | 0.035         | 0.052     | 0.041     | 0.001       |
| SMU_1003 | <i>gid</i>   | glucose-inhibited division protein                             | 0.424         | 0.312     | 0.419     | 0.000       |
| SMU_1004 | <i>gtfB</i>  | glucosyltransferase-I                                          | 0.176         | 0.194     | 0.274     | 0.000       |
| SMU_1005 | <i>gtfC</i>  | glucosyltransferase-SI                                         | 0.522         | 0.705     | 0.908     | 0.043       |
| SMU_1006 | <i>ysaC</i>  | ABC transporter, ATP-binding protein                           | 1.069         | 1.164     | 1.344     | 0.002       |
| SMU_1007 | <i>ysaB</i>  | ABC transporter permease                                       | 1.819         | 2.018     | 2.158     | 0.066       |
| SMU_1008 | <i>llrG</i>  | response regulator                                             | 1.312         | 1.322     | 1.326     | 0.014       |
| SMU_1009 | <i>kinG</i>  | sensor histidine kinase                                        | 2.151         | 2.626     | 2.486     | 1.405       |
| SMU_101  | <i>sorC</i>  | sorbose PTS system, IIC component                              | 2.734         | 1.292     | 1.898     | 0.002       |
| SMU_1010 | <i>citC</i>  | citrate lyase synthetase                                       | 1.140         | 1.234     | 1.154     | 0.125       |
| SMU_1011 | <i>citG</i>  | citG protein                                                   | 1.326         | 1.312     | 1.348     | 0.315       |
| SMU_1012 | <i>cpsY</i>  | transcriptional regulator                                      | 1.018         | 1.180     | 1.362     | 0.001       |
| SMU_1013 | <i>yxiQ</i>  | Mg2+/citrate complex transporter                               | 1.819         | 1.918     | 2.193     | 7.316       |
| SMU_1014 | -            | hypothetical protein                                           | 1.951         | 1.177     | 1.561     | 0.001       |
| SMU_1016 | <i>bcc</i>   | biotin carboxyl carrier protein                                | 0.441         | 0.841     | 0.561     | 0.000       |
| SMU_1017 | <i>oadB</i>  | oxaloacetate decarboxylase, sodium ion pump subunit            | 1.090         | 1.139     | 0.806     | 0.001       |
| SMU_1018 | -            | hypothetical protein                                           | 0.968         | 0.964     | 1.200     | 0.346       |
| SMU_1019 | <i>cilG</i>  | citrate lyase, gamma subunit                                   | 0.263         | 0.212     | 0.200     | 0.000       |
| SMU_102  | <i>sorB</i>  | PTS system, IID component                                      | 3.688         | 2.776     | 5.002     | 3.878       |
| SMU_1020 | <i>cilB</i>  | citrate lyase, beta subunit                                    | 0.871         | 0.892     | 0.420     | 0.001       |
| SMU_1021 | <i>cilA</i>  | citrate lyase alpha chain                                      | 0.721         | 0.714     | 0.336     | 0.000       |
| SMU_1022 | <i>citG2</i> | conserved hypothetical protein (possible CitXG protein)        | 0.463         | 0.425     | 0.282     | 0.001       |
| SMU_1023 | <i>pycB</i>  | pyruvate carboxylase/oxaloacetate decarboxylase, alpha subunit | 0.894         | 0.904     | 0.759     | 0.015       |
| SMU_1025 | <i>rmaA</i>  | transcriptional regulator                                      | 0.633         | 0.576     | 0.486     | 0.036       |
| SMU_1026 | -            | conserved hypothetical protein                                 | 2.686         | 3.053     | 2.669     | 0.001       |
| SMU_1027 | -            | transcriptional regulator (TetR/AcrR family)                   | 2.778         | 3.330     | 3.839     | 0.483       |

|                       |             |                                                                                                                            |       |       |       |       |
|-----------------------|-------------|----------------------------------------------------------------------------------------------------------------------------|-------|-------|-------|-------|
| <b>SMU_1028</b>       | -           | hydrolase or acyltransferase                                                                                               | 1.330 | 1.553 | 1.592 | 0.012 |
| <b>SMU_1029</b>       | -           | hypothetical - transposon                                                                                                  | 0.085 | 0.059 | 0.093 | 0.000 |
| <b>SMU_103</b>        | <i>sorA</i> | PTS system, IIA component                                                                                                  | 6.562 | 5.449 | 5.922 | 0.001 |
| <b>SMU_1030</b>       | -           | polyribonucleotide nucleotidyltransferase                                                                                  | 0.485 | 0.579 | 0.435 | 0.000 |
| <b>SMU_1031</b>       | <i>xis</i>  | transposon excisionase TN916 orf1-like                                                                                     | 1.049 | 0.987 | 1.169 | 0.000 |
| <b>SMU_1032</b>       | <i>tnr5</i> | transposon/phage-related integrase                                                                                         | 0.976 | 1.127 | 1.156 | 0.000 |
| <b>SMU_1034<br/>c</b> | <i>xerC</i> | conserved hypothetical protein (possible integrase/recombinase)                                                            | 0.551 | 0.093 | 0.104 | 0.001 |
| <b>SMU_1035</b>       | <i>glrA</i> | ABC transporter ATP-binding protein homolog                                                                                | 2.142 | 1.861 | 1.612 | 0.004 |
| <b>SMU_1036</b>       | -           | conserved hypothetical protein                                                                                             | 2.644 | 2.932 | 2.757 | 0.002 |
| <b>SMU_1037<br/>c</b> | <i>phoR</i> | histidine kinase                                                                                                           | 1.021 | 1.209 | 1.187 | 0.003 |
| <b>SMU_1038<br/>c</b> | <i>ycbL</i> | response regulator                                                                                                         | 0.731 | 0.938 | 0.864 | 0.001 |
| <b>SMU_1039<br/>c</b> | <i>kdt</i>  | UDP-glucose:(glucosyl) LPS alpha1,2-glucosyltransferase                                                                    | 1.325 | 1.643 | 1.874 | 0.001 |
| <b>SMU_104</b>        | <i>yicl</i> | glycosyl hydrolase, alpha-glucosidase                                                                                      | 3.595 | 2.558 | 1.371 | 0.043 |
| <b>SMU_1040<br/>c</b> | <i>ydfG</i> | oxidoreductase, short-chain dehydrogenase/reductase                                                                        | 1.370 | 1.640 | 1.947 | 0.000 |
| <b>SMU_1041</b>       | <i>ecsA</i> | ABC transporter, ATP-binding protein                                                                                       | 0.417 | 0.303 | 0.370 | 0.001 |
| <b>SMU_1042</b>       | -           | conserved hypothetical protein; possible ABC transporter, permease                                                         | 0.917 | 0.808 | 0.805 | 0.001 |
| <b>SMU_1043<br/>c</b> | <i>pta</i>  | phosphate acetyltransferase                                                                                                | 0.237 | 0.082 | 0.005 | 0.001 |
| <b>SMU_1044<br/>c</b> | <i>rluE</i> | ribosomal large subunit pseudouridine synthase                                                                             | 1.668 | 0.868 | 0.867 | 0.073 |
| <b>SMU_1045<br/>c</b> | <i>ppnK</i> | NAD(+) kinase (ATP-NAD kinase)                                                                                             | 0.000 | 0.000 | 0.000 | 0.000 |
| <b>SMU_1046<br/>c</b> | <i>relA</i> | GTP pyrophosphokinase                                                                                                      | 0.220 | 0.111 | 0.226 | 0.000 |
| <b>SMU_1047<br/>c</b> | -           | hypothetical protein                                                                                                       | 1.557 | 1.558 | 2.173 | 0.003 |
| <b>SMU_1048</b>       | -           | conserved hypothetical protein                                                                                             | 1.041 | 1.079 | 0.917 | 0.000 |
| <b>SMU_105</b>        | <i>scrR</i> | SCR operon transcriptional repressor                                                                                       | 2.707 | 1.503 | 0.921 | 0.001 |
| <b>SMU_1050</b>       | <i>krpS</i> | phosphoribosyl pyrophosphate synthetase                                                                                    | 0.139 | 0.029 | 0.010 | 0.000 |
| <b>SMU_1051</b>       | <i>nifS</i> | aminotransferase (class V); possible iron-sulfur cofactor synthesis protein;pyridoxal-phosphate dependent aminotransferase | 0.000 | 0.001 | 0.001 | 0.008 |
| <b>SMU_1052</b>       | -           | conserved hypothetical protein                                                                                             | 0.242 | 0.278 | 0.297 | 0.000 |
| <b>SMU_1053</b>       | <i>rex</i>  | possible redox-sensing transcriptional repressor Rex                                                                       | 0.371 | 0.217 | 0.082 | 0.008 |
| <b>SMU_1054</b>       | <i>guaA</i> | glutamine amidotransferase                                                                                                 | 0.521 | 0.265 | 0.512 | 0.001 |
| <b>SMU_1055</b>       | <i>radC</i> | DNA repair protein RadC                                                                                                    | 0.723 | 0.674 | 0.994 | 0.000 |
| <b>SMU_1056</b>       | <i>radC</i> | DNA repair protein RadC                                                                                                    | 2.579 | 2.442 | 2.894 | 0.000 |

|               |              |                                                                  |       |       |        |        |
|---------------|--------------|------------------------------------------------------------------|-------|-------|--------|--------|
| SMU_1057      | <i>satE</i>  | acid tolerance protein                                           | 1.457 | 1.312 | 1.655  | 0.003  |
| SMU_1058      | <i>satD</i>  | acid tolerance protein                                           | 0.406 | 0.206 | 0.213  | 0.000  |
| SMU_1059      | <i>satC</i>  | acid tolerance protein                                           | 3.843 | 2.204 | 1.217  | 0.001  |
| SMU_1060      | <i>ffh</i>   | signal recognition particle                                      | 0.122 | 0.003 | 0.007  | 0.001  |
| SMU_1061      | <i>ylxM</i>  | DNA-binding protein                                              | 1.151 | 0.358 | 0.042  | 0.042  |
| SMU_1062      | <i>opuAb</i> | glycine-betaine binding ABC transporter permease                 | 0.576 | 0.358 | 0.350  | 0.001  |
| SMU_1063      | <i>opuAa</i> | amino acid ABC transporter, ATP-binding protein                  | 0.652 | 0.573 | 0.725  | 0.330  |
| SMU_1064<br>c | <i>busR</i>  | transcriptional regulator                                        | 0.977 | 0.595 | 0.437  | 0.001  |
| SMU_1065<br>c | <i>rgrB</i>  | transcriptional regulator, GntR family                           | 1.526 | 0.983 | 0.671  | 0.000  |
| SMU_1066      | <i>guaA</i>  | GMP synthase                                                     | 0.072 | 0.001 | 0.060  | 0.001  |
| SMU_1067<br>c | -            | ABC transporter, permease protein                                | 2.141 | 1.924 | 2.259  | 0.006  |
| SMU_1068<br>c | -            | ABC transporter, ATP-binding protein                             | 1.233 | 1.380 | 1.263  | 0.002  |
| SMU_1069<br>c | -            | hypothetical protein                                             | 2.419 | 1.347 | 2.821  | 0.009  |
| SMU_107       | -            | hypothetical protein                                             | 1.880 | 2.365 | 3.892  | 0.022  |
| SMU_1070<br>c | -            | conserved hypothetical protein                                   | 0.579 | 0.737 | 0.933  | 0.000  |
| SMU_1071<br>c | -            | conserved hypothetical protein                                   | 1.662 | 1.649 | 1.496  | 0.003  |
| SMU_1072<br>c | <i>bar</i>   | acyltransferase                                                  | 0.761 | 0.941 | 0.972  | 0.001  |
| SMU_1073      | <i>fthS</i>  | formate--tetrahydrofolate ligase                                 | 0.368 | 0.133 | 0.000  | 0.000  |
| SMU_1074      | <i>dfpB</i>  | flavoprotein                                                     | 0.034 | 0.017 | 0.026  | 0.000  |
| SMU_1075      | <i>dfp</i>   | DNA/pantothenate metabolism flavoprotein                         | 0.001 | 0.000 | 0.000  | 0.000  |
| SMU_1076      | -            | conserved hypothetical protein (possible membrane protein)       | 1.156 | 1.685 | 0.028  | 0.002  |
| SMU_1077      | <i>pgm</i>   | phosphoglucomutase                                               | 2.338 | 0.001 | 0.007  | 0.001  |
| SMU_1078<br>c | -            | multidrug ABC transporter, ATP-binding and permease protein      | 0.777 | 1.025 | 0.654  | 0.019  |
| SMU_1079<br>c | -            | ABC transporter, ATP-binding / permease protein                  | 0.702 | 1.152 | 0.327  | 0.001  |
| SMU_108       | -            | hypothetical protein                                             | 6.312 | 5.005 | 9.509  | 0.001  |
| SMU_1080<br>c | -            | conserved hypothetical protein                                   | 1.789 | 1.214 | 0.040  | 0.001  |
| SMU_1081<br>c | -            | conserved hypothetical protein                                   | 0.413 | 0.121 | 0.105  | 0.004  |
| SMU_1082      | <i>glyA</i>  | serine hydroxymethyltransferase                                  | 0.536 | 0.300 | 0.143  | 0.007  |
| SMU_1083<br>c | -            | conserved hypothetical protein                                   | 0.037 | 0.000 | 0.000  | 0.000  |
| SMU_1084      | <i>hemK</i>  | protoporphyrinogen oxidase                                       | 0.132 | 0.016 | 0.001  | 0.001  |
| SMU_1085      | <i>rf1</i>   | peptide chain release factor 1                                   | 0.000 | 0.000 | 0.000  | 0.002  |
| SMU_1086      | <i>kitH</i>  | thymidine kinase                                                 | 0.176 | 0.143 | 0.143  | 0.000  |
| SMU_1087      | <i>xyIH</i>  | 4-oxalocrotonate tautomerase                                     | 1.198 | 1.415 | 2.063  | 0.001  |
| SMU_1088      | <i>apbE</i>  | thiamine biosynthesis lipoprotein                                | 0.251 | 0.253 | 0.217  | 0.002  |
| SMU_1089      | -            | conserved hypothetical protein                                   | 0.598 | 0.448 | 0.603  | 0.096  |
| SMU_109       | -            | lantibiotic related antibiotic efflux protein/macrolide permease | 5.679 | 7.863 | 10.357 | 19.644 |
| SMU_1090      | -            | conserved hypothetical protein                                   | 0.581 | 0.537 | 0.564  | 0.000  |

|                             |              |                                                                        |       |       |       |       |
|-----------------------------|--------------|------------------------------------------------------------------------|-------|-------|-------|-------|
| <b>SMU_1091</b>             | <i>wapE</i>  | hypothetical protein (possible cell wall protein)                      | 0.817 | 0.722 | 0.777 | 0.003 |
| <b>SMU_1093</b>             | <i>vex3</i>  | ABC transporter permease protein                                       | 0.856 | 0.890 | 0.901 | 0.002 |
| <b>SMU_1094</b>             | <i>vex2</i>  | ABC transporter, ATP-binding protein                                   | 0.668 | 0.648 | 0.771 | 0.000 |
| <b>SMU_1095</b>             | <i>opuBc</i> | proline/glycine betaine ABC permease and solute binding protein        | 0.644 | 0.598 | 0.650 | 0.001 |
| <b>SMU_1096</b>             | <i>opuBa</i> | ABC transporter, ATP-binding protein                                   | 0.551 | 0.591 | 0.531 | 0.000 |
| <b>SMU_1097</b><br><b>c</b> | -            | transcriptional regulator                                              | 0.575 | 0.612 | 0.665 | 0.003 |
| <b>SMU_1098</b><br><b>c</b> | <i>yogA</i>  | oxidoreductase                                                         | 1.194 | 1.155 | 1.425 | 0.002 |
| <b>SMU_11</b>               | -            | Streptococcus-specific protein                                         | 0.087 | 0.126 | 0.144 | 0.007 |
| <b>SMU_110</b>              | <i>mutR</i>  | transcriptional regulator                                              | 6.142 | 7.638 | 9.753 | 0.496 |
| <b>SMU_1100</b><br><b>c</b> | -            | permease                                                               | 0.936 | 1.300 | 1.409 | 0.001 |
| <b>SMU_1102</b>             | <i>ascB</i>  | 6-phospho-beta-glucosidase, required for arbutin uptake and metabolism | 1.350 | 1.472 | 1.615 | 0.000 |
| <b>SMU_1104</b><br><b>c</b> | <i>gpm</i>   | phosphoglycerate mutase-like protein                                   | 1.417 | 1.606 | 1.660 | 0.000 |
| <b>SMU_1105</b><br><b>c</b> | <i>gpm</i>   | phosphoglycerate mutase-like protein                                   | 0.386 | 0.618 | 0.483 | 0.005 |
| <b>SMU_1106</b><br><b>c</b> | <i>gpm</i>   | phosphoglycerate mutase-like protein                                   | 1.038 | 1.133 | 1.487 | 0.001 |
| <b>SMU_1107</b><br><b>c</b> | -            | conserved hypothetical protein                                         | 1.836 | 1.740 | 1.854 | 0.406 |
| <b>SMU_1108</b><br><b>c</b> | -            | hydrolase                                                              | 0.654 | 0.862 | 0.838 | 0.000 |
| <b>SMU_1109</b><br><b>c</b> | -            | conserved hypothetical protein                                         | 1.056 | 1.412 | 1.976 | 0.931 |
| <b>SMU_1111</b><br><b>c</b> | -            | conserved hypothetical protein                                         | 1.012 | 0.747 | 0.817 | 0.001 |
| <b>SMU_1112</b><br><b>c</b> | -            | conserved hypothetical protein                                         | 0.366 | 0.747 | 0.439 | 0.000 |
| <b>SMU_1113</b>             | <i>srtA</i>  | sortase                                                                | 0.812 | 1.563 | 2.833 | 0.000 |
| <b>SMU_1114</b>             | <i>gyrA</i>  | DNA gyrase A subunit                                                   | 0.003 | 0.000 | 0.001 | 0.003 |
| <b>SMU_1115</b>             | <i>ldh</i>   | L-lactate dehydrogenase                                                | 0.000 | 0.001 | 0.001 | 0.011 |
| <b>SMU_1116</b><br><b>c</b> | -            | hypothetical protein                                                   | 1.046 | 1.044 | 0.996 | 0.014 |
| <b>SMU_1117</b>             | <i>nox</i>   | H <sub>2</sub> O-forming NADH Oxidase                                  | 0.533 | 0.428 | 0.491 | 0.001 |
| <b>SMU_1118</b><br><b>c</b> | <i>msD</i>   | ribonucleoside ABC transporter permease                                | 1.206 | 0.958 | 0.788 | 0.002 |
| <b>SMU_1119</b><br><b>c</b> | <i>msC</i>   | ribonucleoside ABC transporter permease                                | 0.861 | 0.804 | 0.534 | 0.000 |
| <b>SMU_1120</b>             | <i>msA</i>   | ribonucleoside ABC transporter, ATP-binding protein                    | 0.922 | 0.739 | 0.604 | 0.002 |
| <b>SMU_1121</b><br><b>c</b> | <i>msB</i>   | ribonucleoside ABC transporter, solute-binding protein                 | 0.640 | 0.694 | 0.424 | 0.000 |
| <b>SMU_1122</b>             | <i>cdd</i>   | cytidine deaminase                                                     | 0.843 | 0.660 | 0.742 | 0.001 |
| <b>SMU_1123</b>             | <i>deoC</i>  | deoxyribose-phosphate aldolase                                         | 0.957 | 0.557 | 0.398 | 0.000 |
| <b>SMU_1124</b>             | <i>pdp</i>   | pyrimidine-nucleoside phosphorylase                                    | 1.017 | 0.839 | 0.762 | 0.002 |

|                             |              |                                                                                    |       |       |       |       |
|-----------------------------|--------------|------------------------------------------------------------------------------------|-------|-------|-------|-------|
| <b>SMU_1125</b><br><b>c</b> | -            | conserved hypothetical protein                                                     | 1.030 | 0.918 | 0.936 | 0.002 |
| <b>SMU_1126</b>             | <i>coaA</i>  | pantothenate kinase                                                                | 0.003 | 0.001 | 0.000 | 0.004 |
| <b>SMU_1127</b>             | <i>rs20</i>  | 30S ribosomal protein S20                                                          | 2.062 | 2.142 | 2.815 | 0.000 |
| <b>SMU_1128</b>             | <i>ciaH</i>  | two-component sensor histidine kinase                                              | 0.884 | 1.083 | 0.457 | 0.001 |
| <b>SMU_1129</b>             | <i>ciaR</i>  | two-component response regulator                                                   | 0.384 | 0.366 | 0.324 | 0.001 |
| <b>SMU_112c</b>             | -            | transcriptional regulator, RpiR family                                             | 2.382 | 2.501 | 3.080 | 0.001 |
| <b>SMU_113</b>              | <i>pfk</i>   | fructose-1-phosphate kinase                                                        | 1.607 | 1.745 | 2.031 | 0.001 |
| <b>SMU_1131</b><br><b>c</b> | -            | hypothetical protein                                                               | 0.485 | 0.811 | 0.708 | 0.000 |
| <b>SMU_1132</b>             | <i>pepN</i>  | lysyl-aminopeptidase                                                               | 0.307 | 0.228 | 0.308 | 0.002 |
| <b>SMU_1133</b>             | <i>phoU</i>  | phosphate uptake regulatory protein                                                | 0.230 | 0.321 | 0.048 | 0.001 |
| <b>SMU_1134</b><br><b>c</b> | <i>pstB</i>  | phosphate ABC transporter, ATP-binding protein                                     | 0.011 | 0.001 | 0.001 | 0.000 |
| <b>SMU_1135</b>             | <i>pstB</i>  | phosphate ABC transporter, ATP-binding protein                                     | 0.030 | 0.002 | 0.005 | 0.002 |
| <b>SMU_1136</b>             | <i>pstC</i>  | phosphate ABC transporter, permease                                                | 0.001 | 0.003 | 0.000 | 0.002 |
| <b>SMU_1137</b>             | <i>pstC1</i> | phosphate ABC transporter, permease                                                | 0.007 | 0.002 | 0.001 | 0.002 |
| <b>SMU_1138</b>             | <i>pstS</i>  | phosphate ABC transporter, periplasmic phosphate-binding protein                   | 0.001 | 0.001 | 0.000 | 0.000 |
| <b>SMU_1139</b><br><b>c</b> | <i>yebU</i>  | rRNA methyltransferase, NOL1/NOP2/sun family                                       | 0.593 | 0.245 | 0.323 | 0.009 |
| <b>SMU_114</b>              | -            | PTS system, fructose-specific IIBC component                                       | 1.957 | 2.383 | 2.472 | 0.001 |
| <b>SMU_1140</b><br><b>c</b> | -            | conserved hypothetical protein (possible myo-inositol-1(or 4)-monophosphatase)     | 0.850 | 0.425 | 0.533 | 0.000 |
| <b>SMU_1141</b><br><b>c</b> | -            | conserved hypothetical protein                                                     | 0.345 | 0.066 | 0.093 | 0.033 |
| <b>SMU_1142</b><br><b>c</b> | -            | conserved hypothetical protein (possible arsenate reductase)                       | 0.184 | 0.036 | 0.026 | 0.006 |
| <b>SMU_1143</b><br><b>c</b> | <i>mreA</i>  | bifunctional protein: riboflavin kinase/flavin adenine dinucleotide (FAD) synthase | 0.009 | 0.014 | 0.016 | 0.003 |
| <b>SMU_1144</b>             | <i>truB</i>  | tRNA pseudouridine synthase B                                                      | 0.486 | 0.123 | 0.149 | 0.001 |
| <b>SMU_1145</b><br><b>c</b> | <i>covS</i>  | histidine kinase related to CovS                                                   | 1.005 | 1.106 | 0.900 | 0.001 |
| <b>SMU_1146</b><br><b>c</b> | <i>covR</i>  | response regulator related to CovR                                                 | 1.705 | 1.460 | 1.371 | 0.006 |
| <b>SMU_1147</b><br><b>c</b> | -            | hypothetical protein                                                               | 0.884 | 0.925 | 1.039 | 0.002 |
| <b>SMU_1148</b>             | <i>lctF</i>  | ABC transporter, ATPase component                                                  | 0.666 | 0.803 | 0.796 | 0.000 |
| <b>SMU_1149</b>             | <i>lctE</i>  | ABC transporter, membrane spanning                                                 | 1.190 | 1.181 | 1.298 | 0.000 |
| <b>SMU_115</b>              | -            | PTS system, fructose-specific IIA component                                        | 2.853 | 3.318 | 3.368 | 0.000 |

|                             |             |                                                        |       |       |       |        |
|-----------------------------|-------------|--------------------------------------------------------|-------|-------|-------|--------|
| <b>SMU_1150</b>             | <i>lctG</i> | ABC transporter, membrane spanning                     | 1.032 | 0.870 | 0.797 | 16.724 |
| <b>SMU_1151</b><br><b>c</b> | -           | conserved hypothetical protein                         | 0.899 | 0.934 | 0.866 | 0.001  |
| <b>SMU_1152</b><br><b>c</b> | -           | conserved hypothetical protein                         | 0.660 | 2.464 | 1.675 | 0.000  |
| <b>SMU_1153</b><br><b>c</b> | -           | conserved hypothetical protein                         | 1.879 | 1.902 | 2.050 | 0.001  |
| <b>SMU_1154</b><br><b>c</b> | -           | conserved hypothetical protein                         | 1.492 | 0.822 | 0.663 | 0.000  |
| <b>SMU_1155</b>             | -           | hypothetical protein                                   | 2.051 | 1.520 | 1.520 | 0.001  |
| <b>SMU_1156</b><br><b>c</b> | -           | hypothetical protein                                   | 4.442 | 2.860 | 2.447 | 0.001  |
| <b>SMU_1157</b><br><b>c</b> | -           | conserved hypothetical protein                         | 3.864 | 3.694 | 4.233 | 0.002  |
| <b>SMU_1158</b><br><b>c</b> | -           | conserved hypothetical protein                         | 1.195 | 0.936 | 0.649 | 0.002  |
| <b>SMU_1159</b><br><b>c</b> | -           | hypothetical protein                                   | 0.410 | 0.560 | 0.397 | 0.000  |
| <b>SMU_116</b>              | <i>lacD</i> | tagatose 1,6-aldolase                                  | 3.361 | 3.371 | 3.535 | 0.001  |
| <b>SMU_1160</b><br><b>c</b> | -           | hypothetical protein                                   | 3.035 | 2.798 | 3.029 | 0.002  |
| <b>SMU_1161</b><br><b>c</b> | -           | conserved hypothetical protein                         | 2.590 | 1.706 | 1.470 | 0.001  |
| <b>SMU_1163</b><br><b>c</b> | -           | ABC transporter, ATPase component                      | 1.079 | 1.191 | 1.267 | 0.001  |
| <b>SMU_1164</b><br><b>c</b> | -           | ABC transporter, ATPase component                      | 1.478 | 1.474 | 1.370 | 0.001  |
| <b>SMU_1165</b><br><b>c</b> | <i>acrR</i> | transcriptional regulator (TetR/AcrR family)           | 0.871 | 0.949 | 0.844 | 0.000  |
| <b>SMU_1166</b><br><b>c</b> | <i>psaB</i> | ABC transporter permease                               | 1.009 | 1.162 | 1.239 | 0.002  |
| <b>SMU_1167</b><br><b>c</b> | <i>psaA</i> | ABC transporter ATP-binding protein                    | 0.935 | 1.217 | 2.776 | 0.001  |
| <b>SMU_1168</b>             | <i>psaR</i> | transcriptional regulator (TetR/AcrR family)           | 2.054 | 2.301 | 1.994 | 0.008  |
| <b>SMU_1169</b><br><b>c</b> | -           | thioredoxin family protein                             | 1.186 | 0.936 | 0.882 | 0.001  |
| <b>SMU_1170</b>             | <i>ccdA</i> | cytochrome c-type biogenesis protein                   | 0.768 | 0.907 | 0.947 | 0.001  |
| <b>SMU_1171</b><br><b>c</b> | -           | conserved hypothetical protein                         | 1.083 | 1.014 | 0.758 | 0.000  |
| <b>SMU_1172</b><br><b>c</b> | -           | conserved hypothetical protein                         | 1.090 | 0.713 | 0.678 | 0.001  |
| <b>SMU_1173</b>             | <i>cysD</i> | O-acetylhomoserine sulfhydrylase                       | 0.898 | 0.462 | 0.543 | 0.009  |
| <b>SMU_1174</b>             | <i>pcrA</i> | ATP-dependent DNA helicase                             | 0.493 | 0.046 | 0.012 | 0.000  |
| <b>SMU_1175</b>             | <i>dagA</i> | sodium:alanine (or glycine) symporter                  | 0.748 | 0.446 | 0.838 | 0.002  |
| <b>SMU_1176</b>             | <i>ydaE</i> | cation efflux protein                                  | 1.636 | 0.890 | 0.136 | 0.497  |
| <b>SMU_1177</b><br><b>c</b> | <i>aatB</i> | amino acid ABC transporter, amino acid-binding protein | 0.360 | 0.033 | 0.354 | 0.001  |
| <b>SMU_1178</b><br><b>c</b> | <i>msmK</i> | amino acid ABC transporter, ATP-binding protein        | 0.760 | 0.059 | 0.388 | 0.001  |
| <b>SMU_1179</b><br><b>c</b> | <i>glnP</i> | amino acid ABC transporter, permease                   | 0.926 | 0.190 | 0.780 | 0.006  |
| <b>SMU_117c</b>             | -           | conserved hypothetical protein                         | 4.029 | 4.600 | 4.757 | 1.644  |

|                       |              |                                                              |       |       |       |       |
|-----------------------|--------------|--------------------------------------------------------------|-------|-------|-------|-------|
| <b>SMU_1180</b>       | <i>phnA</i>  | alkylphosphonate uptake protein                              | 0.453 | 0.769 | 2.085 | 0.002 |
| <b>SMU_1182</b>       | <i>mtlD</i>  | mannitol 1-phosphate 5-dehydrogenase                         | 0.415 | 0.234 | 0.576 | 0.001 |
| <b>SMU_1183</b>       | <i>mtlA2</i> | phosphotransferase system enzyme II                          | 0.576 | 0.272 | 0.244 | 0.001 |
| <b>SMU_1184<br/>c</b> | -            | transcriptional regulator                                    | 0.728 | 0.994 | 1.028 | 0.001 |
| <b>SMU_1185</b>       | <i>mtlA1</i> | mannitol PTS EII                                             | 0.609 | 1.327 | 0.983 | 0.007 |
| <b>SMU_1187</b>       | <i>glmS</i>  | L-glutamine-D-fructose-6-phosphate amidotransferase          | 0.000 | 0.000 | 0.001 | 0.002 |
| <b>SMU_1188</b>       | <i>lepB</i>  | signal peptidase I                                           | 1.379 | 1.004 | 1.720 | 0.001 |
| <b>SMU_1189<br/>c</b> | -            | conserved hypothetical protein                               | 1.419 | 1.631 | 1.817 | 0.008 |
| <b>SMU_118c</b>       | -            | esterase                                                     | 3.076 | 3.843 | 4.097 | 0.001 |
| <b>SMU_119</b>        | <i>adh</i>   | alcohol dehydrogenase class III                              | 3.045 | 3.104 | 2.648 | 0.328 |
| <b>SMU_1190</b>       | <i>pykF</i>  | pyruvate kinase                                              | 0.004 | 0.001 | 0.002 | 0.005 |
| <b>SMU_1191</b>       | <i>pfk</i>   | 6-phosphofructokinase                                        | 0.002 | 0.000 | 0.000 | 0.000 |
| <b>SMU_1192</b>       | <i>dnaE</i>  | DNA-polymerase III subunit alpha                             | 0.002 | 0.002 | 0.003 | 0.005 |
| <b>SMU_1193</b>       | <i>yhcF</i>  | transcriptional regulator, GntR family                       | 0.407 | 0.045 | 0.047 | 0.618 |
| <b>SMU_1194</b>       | <i>yurY</i>  | ABC transporter, ATP-binding protein                         | 0.798 | 0.775 | 1.161 | 0.002 |
| <b>SMU_1195</b>       | -            | ABC transporter permease protein                             | 1.311 | 1.186 | 1.994 | 0.152 |
| <b>SMU_1196<br/>c</b> | -            | conserved hypothetical protein                               | 0.937 | 0.731 | 0.948 | 0.000 |
| <b>SMU_1197</b>       | -            | conserved hypothetical protein                               | 0.646 | 0.537 | 0.962 | 0.081 |
| <b>SMU_12</b>         | -            | conserved hypothetical protein                               | 2.204 | 3.620 | 3.910 | 0.003 |
| <b>SMU_120</b>        | <i>r128</i>  | 50S ribosomal protein L28                                    | 0.487 | 0.337 | 0.499 | 0.009 |
| <b>SMU_1200</b>       | <i>rs1</i>   | 30S ribosomal protein S1                                     | 0.039 | 0.010 | 0.040 | 0.001 |
| <b>SMU_1201<br/>c</b> | -            | conserved hypothetical protein                               | 0.000 | 0.000 | 0.000 | 0.000 |
| <b>SMU_1203</b>       | <i>ilvE</i>  | branched-chain amino acid aminotransferase                   | 0.457 | 0.009 | 0.000 | 0.001 |
| <b>SMU_1204</b>       | <i>parC</i>  | DNA topoisomerase IV subunit A                               | 0.001 | 0.001 | 0.001 | 0.014 |
| <b>SMU_1205<br/>c</b> | -            | hypothetical protein                                         | 2.227 | 2.298 | 2.638 | 0.000 |
| <b>SMU_1206<br/>c</b> | -            | conserved hypothetical protein                               | 0.198 | 0.187 | 0.137 | 0.002 |
| <b>SMU_1207</b>       | <i>fic</i>   | cell filamentation / mobilization protein                    | 0.579 | 0.232 | 0.215 | 0.000 |
| <b>SMU_1208<br/>c</b> | -            | hypothetical protein                                         | 0.233 | 0.162 | 0.183 | 0.109 |
| <b>SMU_1209<br/>c</b> | -            | hypothetical protein                                         | 0.677 | 0.454 | 0.651 | 0.001 |
| <b>SMU_121</b>        | <i>dinF</i>  | MATE efflux family , DinF                                    | 1.984 | 2.011 | 1.798 | 0.001 |
| <b>SMU_1210</b>       | <i>parE</i>  | DNA topoisomerase IV subunit B                               | 0.001 | 0.000 | 0.000 | 0.001 |
| <b>SMU_1211</b>       | -            | conserved hypothetical protein                               | 0.008 | 0.001 | 0.001 | 0.002 |
| <b>SMU_1213<br/>c</b> | <i>cpdB</i>  | 5'-nucleotidase/2',3'-cyclic-nucleotide 2'-phosphodiesterase | 1.152 | 0.890 | 0.632 | 0.021 |
| <b>SMU_1214</b>       | <i>pyrC</i>  | dihydroorotase                                               | 0.942 | 0.648 | 0.058 | 0.005 |
| <b>SMU_1215</b>       | <i>ung</i>   | uracil-DNA glycosylase                                       | 0.726 | 0.530 | 0.197 | 0.002 |
| <b>SMU_1216<br/>c</b> | -            | ABC transporter, amino acid permease                         | 1.843 | 1.564 | 1.395 | 1.285 |

|                      |              |                                                                                                        |       |       |       |       |
|----------------------|--------------|--------------------------------------------------------------------------------------------------------|-------|-------|-------|-------|
| <b>SMU_1217</b><br>c | <i>atmA</i>  | amino acid ABC transporter, substrate binding protein                                                  | 0.495 | 0.438 | 0.432 | 0.004 |
| <b>SMU_1218</b>      | <i>nylA</i>  | Gln-dependent amidotransferase, subunit A                                                              | 1.322 | 1.005 | 0.736 | 0.144 |
| <b>SMU_1219</b><br>c | -            | conserved hypothetical protein                                                                         | 1.181 | 1.230 | 0.537 | 0.880 |
| <b>SMU_1220</b><br>c | -            | conserved hypothetical protein                                                                         | 1.730 | 1.695 | 0.904 | 0.000 |
| <b>SMU_1221</b>      | <i>pyrE</i>  | orotate phosphoribosyltransferase                                                                      | 0.913 | 0.896 | 0.035 | 0.019 |
| <b>SMU_1222</b>      | <i>pyrF</i>  | orotidine 5'-phosphate decarboxylase                                                                   | 1.351 | 0.777 | 0.015 | 0.000 |
| <b>SMU_1223</b>      | <i>pyrDB</i> | dihydroorotate dehydrogenase                                                                           | 1.144 | 0.892 | 0.069 | 0.000 |
| <b>SMU_1224</b>      | <i>pyrK</i>  | dihydroorotate dehydrogenase electron transfer subunit                                                 | 1.488 | 1.337 | 0.123 | 0.000 |
| <b>SMU_1225</b>      | <i>cpsY</i>  | transcriptional regulator, LysR family; probable metC <sub>cysK</sub> operon transcriptional activator | 1.294 | 1.331 | 0.894 | 0.002 |
| <b>SMU_1226</b><br>c | -            | histidine protein kinase                                                                               | 1.074 | 0.761 | 0.892 | 0.001 |
| <b>SMU_1227</b>      | <i>deoD</i>  | purine-nucleotide phosphorylase                                                                        | 0.690 | 0.477 | 0.565 | 0.003 |
| <b>SMU_1228</b><br>c | -            | glutamine amidotransferase                                                                             | 1.211 | 1.325 | 1.231 | 0.001 |
| <b>SMU_1229</b>      | <i>punA</i>  | purine nucleoside phosphorylase                                                                        | 0.741 | 0.673 | 0.614 | 0.001 |
| <b>SMU_123</b>       | <i>polC</i>  | DNA polymerase III, alpha subunit                                                                      | 0.006 | 0.004 | 0.002 | 0.001 |
| <b>SMU_1230</b><br>c | -            | conserved hypothetical protein                                                                         | 2.561 | 1.841 | 2.446 | 0.002 |
| <b>SMU_1232</b><br>c | -            | conserved hypothetical protein                                                                         | 0.981 | 0.554 | 0.389 | 0.001 |
| <b>SMU_1233</b>      | <i>deoB</i>  | phosphopentomutase                                                                                     | 1.487 | 0.362 | 0.952 | 0.001 |
| <b>SMU_1234</b>      | <i>rpiA</i>  | ribose 5-phosphate isomerase A                                                                         | 0.098 | 0.030 | 0.014 | 0.001 |
| <b>SMU_1235</b>      | <i>thdF</i>  | thiophene and furan oxidation protein; tRNA modification GTPase                                        | 0.244 | 0.014 | 0.010 | 0.000 |
| <b>SMU_1236</b><br>c | -            | conserved hypothetical protein (possible dihydroorotase family)                                        | 0.781 | 0.653 | 0.880 | 0.001 |
| <b>SMU_1237</b><br>c | -            | hypothetical protein                                                                                   | 1.111 | 1.674 | 2.192 | 0.000 |
| <b>SMU_1238</b><br>c | -            | conserved hypothetical protein                                                                         | 0.803 | 1.549 | 0.472 | 0.001 |
| <b>SMU_1239</b>      | <i>pepV</i>  | dipeptidase                                                                                            | 0.565 | 0.387 | 0.629 | 0.000 |
| <b>SMU_124</b>       | <i>ykoM</i>  | transcriptional regulator, MarR family                                                                 | 1.352 | 0.458 | 1.091 | 0.002 |
| <b>SMU_1240</b><br>c | <i>nrd</i>   | nitroreductase family protein                                                                          | 0.523 | 0.382 | 0.515 | 0.000 |
| <b>SMU_1241</b>      | <i>uvrC</i>  | excinuclease ABC, subunit C                                                                            | 0.860 | 0.478 | 0.460 | 0.000 |
| <b>SMU_1243</b>      | <i>ltrA</i>  | conserved hypothetical protein (possible low temperature requirement protein A)                        | 1.784 | 1.406 | 1.331 | 0.001 |
| <b>SMU_1245</b><br>c | -            | hydrolase, haloacid dehalogenase-like family                                                           | 0.776 | 0.535 | 0.788 | 0.000 |
| <b>SMU_1246</b><br>c | -            | transcriptional regulator (TetR/AcrR family)                                                           | 0.837 | 0.667 | 0.769 | 0.001 |
| <b>SMU_1247</b>      | <i>eno</i>   | enolase                                                                                                | 0.000 | 0.001 | 0.000 | 0.000 |



|                      |             |                                                                                 |       |       |        |        |
|----------------------|-------------|---------------------------------------------------------------------------------|-------|-------|--------|--------|
| <b>SMU_1249</b><br>c | -           | hypothetical protein                                                            | 1.765 | 1.690 | 1.242  | 0.001  |
| <b>SMU_125</b>       | -           | conserved hypothetical protein                                                  | 3.892 | 2.291 | 1.735  | 0.007  |
| <b>SMU_1250</b><br>c | -           | hypothetical protein                                                            | 1.403 | 1.604 | 1.229  | 0.731  |
| <b>SMU_1251</b>      | -           | conserved hypothetical protein                                                  | 0.935 | 1.253 | 0.995  | 0.001  |
| <b>SMU_1252</b>      | <i>cgk</i>  | glycerate kinase                                                                | 1.271 | 1.248 | 1.329  | 0.043  |
| <b>SMU_1253</b><br>c | -           | hypothetical protein                                                            | 1.520 | 1.526 | 1.188  | 0.003  |
| <b>SMU_1254</b>      | -           | phosphatase                                                                     | 0.801 | 0.669 | 0.757  | 0.000  |
| <b>SMU_1255</b><br>c | -           | hypothetical protein                                                            | 0.997 | 1.119 | 1.306  | 0.000  |
| <b>SMU_1256</b><br>c | -           | hypothetical protein                                                            | 2.174 | 0.554 | 0.397  | 0.000  |
| <b>SMU_1257</b><br>c | -           | conserved hypothetical protein                                                  | 0.978 | 1.215 | 1.002  | 0.000  |
| <b>SMU_1258</b><br>c | -           | type II restriction endonuclease subunit                                        | 1.566 | 1.480 | 1.829  | 0.182  |
| <b>SMU_1259</b>      | -           | restriction endonuclease                                                        | 3.446 | 3.919 | 3.337  | 0.000  |
| <b>SMU_1260</b><br>c | -           | conserved hypothetical protein                                                  | 1.536 | 1.146 | 1.428  | 3.568  |
| <b>SMU_1261</b><br>c | <i>hisE</i> | phosphoribosyl-AMP<br>cyclohydrolase/phosphoribosyl-ATP<br>pyrophosphohydrolase | 1.135 | 0.663 | 0.820  | 0.000  |
| <b>SMU_1262</b><br>c | -           | hypothetical protein                                                            | 8.286 | 7.221 | 8.554  | 0.002  |
| <b>SMU_1263</b>      | <i>hisI</i> | phosphoribosyl-AMP<br>cyclohydrolase/phosphoribosyl-ATP<br>pyrophosphatase      | 2.154 | 0.690 | 1.023  | 2.273  |
| <b>SMU_1264</b>      | <i>hisF</i> | cyclase HisF/ imidazoleglycerol-<br>phosphate synthase                          | 1.269 | 0.434 | 0.509  | 0.000  |
| <b>SMU_1265</b>      | <i>hisA</i> | phosphoribosylformimino-5-<br>aminoimidazole carboxamide ribotide<br>isomerase  | 1.135 | 0.325 | 0.412  | 0.000  |
| <b>SMU_1266</b>      | <i>hisH</i> | amidotransferase; possible<br>imidazoleglycerol-phosphate synthase              | 0.325 | 0.074 | 0.096  | 0.002  |
| <b>SMU_1267</b><br>c | -           | hypothetical protein                                                            | 1.230 | 0.463 | 0.279  | 0.004  |
| <b>SMU_1268</b>      | <i>hisB</i> | imidazoleglycerol-phosphate<br>dehydratase                                      | 0.545 | 0.153 | 0.224  | 0.177  |
| <b>SMU_1269</b>      | <i>serB</i> | phosphoserine phosphatase                                                       | 0.272 | 0.042 | 0.030  | 0.000  |
| <b>SMU_127</b>       | <i>adhA</i> | acetoin dehydrogenase (TPP-<br>dependent) E1 component alpha subunit            | 2.021 | 0.540 | 1.703  | 0.000  |
| <b>SMU_1270</b>      | <i>hisD</i> | histidinol dehydrogenase                                                        | 0.467 | 0.068 | 0.086  | 0.000  |
| <b>SMU_1271</b>      | <i>hisG</i> | ATP phosphoribosyltransferase                                                   | 0.674 | 0.125 | 0.163  | 0.000  |
| <b>SMU_1272</b>      | <i>hisZ</i> | histidyl-tRNA synthetase                                                        | 0.981 | 0.226 | 0.299  | 0.000  |
| <b>SMU_1273</b>      | <i>hisC</i> | histidinol-phosphate aminotransferase                                           | 0.886 | 0.130 | 0.264  | 0.000  |
| <b>SMU_1276</b><br>c | <i>ezrA</i> | cell division regulator                                                         | 0.138 | 0.017 | 0.022  | 0.001  |
| <b>SMU_1277</b>      | <i>gyrB</i> | DNA gyrase subunit B                                                            | 0.001 | 0.000 | 0.000  | 0.000  |
| <b>SMU_1278</b><br>c | <i>gph</i>  | phosphoglycolate phosphatase                                                    | 0.199 | 0.050 | 0.074  | 0.001  |
| <b>SMU_1279</b><br>c | <i>rodA</i> | cell division protein; shape-determining<br>protein                             | 2.516 | 7.086 | 15.449 | 68.086 |

|                       |             |                                                                            |       |       |       |       |
|-----------------------|-------------|----------------------------------------------------------------------------|-------|-------|-------|-------|
| <b>SMU_128</b>        | <i>adhB</i> | acetoin dehydrogenase (TPP-dependent) E1 component beta subunit            | 1.067 | 0.423 | 1.230 | 0.002 |
| <b>SMU_1280<br/>c</b> | -           | conserved hypothetical protein (possible alpha/beta superfamily hydrolase) | 1.077 | 0.786 | 0.711 | 0.001 |
| <b>SMU_1282</b>       | <i>psaR</i> | transcriptional regulator, AcrR family                                     | 2.046 | 1.870 | 1.974 | 0.153 |
| <b>SMU_1284<br/>c</b> | -           | conserved hypothetical protein                                             | 1.076 | 0.823 | 0.830 | 0.000 |
| <b>SMU_1286<br/>c</b> | <i>blt</i>  | multidrug resistance permease                                              | 2.340 | 1.750 | 1.931 | 0.002 |
| <b>SMU_1287</b>       | <i>tnrA</i> | transcriptional regulator                                                  | 1.715 | 1.181 | 1.179 | 0.002 |
| <b>SMU_1288</b>       | <i>rl19</i> | 50S ribosomal protein L19                                                  | 0.138 | 0.026 | 0.055 | 0.000 |
| <b>SMU_1289<br/>c</b> | -           | voltage-gated chloride channel family                                      | 1.055 | 0.651 | 1.072 | 0.001 |
| <b>SMU_129</b>        | <i>adhC</i> | dihydrolipoamide S-acetyltransferase                                       | 1.105 | 0.281 | 0.621 | 0.000 |
| <b>SMU_1290<br/>c</b> | -           | conserved hypothetical protein                                             | 1.226 | 0.966 | 1.229 | 0.002 |
| <b>SMU_1291<br/>c</b> | <i>pheA</i> | chorismate mutase                                                          | 0.046 | 0.050 | 0.126 | 0.001 |
| <b>SMU_1292<br/>c</b> | -           | conserved hypothetical protein                                             | 2.108 | 1.168 | 1.737 | 0.000 |
| <b>SMU_1293<br/>c</b> | -           | conserved hypothetical protein                                             | 0.808 | 0.530 | 0.729 | 0.006 |
| <b>SMU_1294</b>       | <i>flaW</i> | flavodoxin                                                                 | 0.000 | 0.002 | 0.001 | 0.001 |
| <b>SMU_1295</b>       | <i>add</i>  | adenosine deaminase                                                        | 0.463 | 0.031 | 0.500 | 0.000 |
| <b>SMU_1296</b>       | <i>yghU</i> | glutathione S-transferase                                                  | 0.862 | 1.167 | 1.080 | 0.000 |
| <b>SMU_1297</b>       | -           | conserved hypothetical protein, DHH family                                 | 0.589 | 0.022 | 0.000 | 0.000 |
| <b>SMU_1298</b>       | <i>rl31</i> | 50S ribosomal protein L31                                                  | 0.028 | 0.000 | 0.000 | 0.000 |
| <b>SMU_1299<br/>c</b> | -           | methyltransferase, possible acetate kinase                                 | 0.768 | 0.863 | 0.755 | 0.000 |
| <b>SMU_13</b>         | -           | cell-cycle protein, PP-loop superfamily                                    | 0.002 | 0.012 | 0.013 | 0.003 |
| <b>SMU_130</b>        | <i>adhD</i> | dihydrolipoamide dehydrogenase                                             | 1.119 | 0.391 | 0.892 | 0.001 |
| <b>SMU_1300<br/>c</b> | -           | conserved hypothetical protein                                             | 0.630 | 0.779 | 0.748 | 0.010 |
| <b>SMU_1301<br/>c</b> | -           | methyltransferase related segment                                          | 1.420 | 2.041 | 1.787 | 0.001 |
| <b>SMU_1302</b>       | <i>adcA</i> | zinc ABC transporter, substrate-binding protein                            | 0.642 | 0.598 | 0.783 | 0.001 |
| <b>SMU_1303<br/>c</b> | <i>pepD</i> | dipeptidase                                                                | 1.274 | 0.722 | 0.541 | 0.000 |
| <b>SMU_1304<br/>c</b> | -           | conserved hypothetical protein                                             | 1.303 | 0.514 | 0.492 | 0.000 |
| <b>SMU_1305<br/>c</b> | -           | conserved hypothetical protein                                             | 1.662 | 1.971 | 1.276 | 0.000 |
| <b>SMU_1306<br/>c</b> | -           | conserved hypothetical protein, ATP-binding domain                         | 0.474 | 0.187 | 0.182 | 0.008 |
| <b>SMU_1307<br/>c</b> | -           | conserved hypothetical protein                                             | 0.821 | 0.614 | 0.786 | 0.001 |
| <b>SMU_1308</b>       | <i>aldR</i> | AldR-related regulatory protein: translation initiation inhibitor          | 0.650 | 0.412 | 0.519 | 0.001 |
| <b>SMU_1309<br/>c</b> | <i>gldA</i> | glycerol dehydrogenase                                                     | 0.684 | 0.368 | 0.407 | 0.000 |

|                             |              |                                                                                              |       |       |       |        |
|-----------------------------|--------------|----------------------------------------------------------------------------------------------|-------|-------|-------|--------|
| <b>SMU_131</b>              | <i>lplA</i>  | lipoate-protein ligase                                                                       | 2.391 | 0.555 | 1.349 | 0.000  |
| <b>SMU_1310</b>             | -            | hypothetical protein                                                                         | 1.370 | 0.560 | 1.164 | 0.001  |
| <b>SMU_1311</b>             | <i>asnS</i>  | asparaginyl-tRNA synthetase                                                                  | 0.654 | 0.457 | 0.502 | 0.001  |
| <b>SMU_1312</b>             | <i>aspB</i>  | aspartate aminotransferase                                                                   | 0.213 | 0.016 | 0.015 | 0.002  |
| <b>SMU_1313</b><br><b>c</b> | <i>dinG</i>  | ATP-dependent DNA helicase                                                                   | 0.999 | 0.842 | 0.806 | 0.003  |
| <b>SMU_1314</b>             | -            | conserved hypothetical protein                                                               | 2.685 | 1.735 | 1.480 | 15.461 |
| <b>SMU_1315</b><br><b>c</b> | -            | ABC transporter, ATP-binding protein                                                         | 2.202 | 2.138 | 1.916 | 0.001  |
| <b>SMU_1316</b><br><b>c</b> | -            | hypothetical protein                                                                         | 2.070 | 1.939 | 2.673 | 0.003  |
| <b>SMU_1317</b><br><b>c</b> | -            | hypothetical protein                                                                         | 3.857 | 3.806 | 4.416 | 0.026  |
| <b>SMU_1319</b><br><b>c</b> | -            | conserved hypothetical protein                                                               | 0.718 | 0.892 | 0.776 | 0.005  |
| <b>SMU_132</b>              | <i>hipO</i>  | amino acid amidohydrolase (hippurate amidohydrolase)                                         | 1.072 | 0.936 | 1.091 | 0.835  |
| <b>SMU_1321</b><br><b>c</b> | -            | conserved hypothetical protein                                                               | 1.557 | 1.955 | 1.713 | 2.747  |
| <b>SMU_1322</b>             | <i>budC</i>  | acetoin reductase                                                                            | 0.765 | 0.794 | 0.667 | 0.000  |
| <b>SMU_1323</b>             | -            | conserved hypothetical protein (possible hydrolase)                                          | 0.986 | 0.921 | 0.941 | 0.000  |
| <b>SMU_1324</b>             | <i>ftsX</i>  | cell division ABC transporter, permease                                                      | 0.193 | 0.001 | 0.001 | 0.001  |
| <b>SMU_1325</b>             | <i>ftsE</i>  | cell-division ABC transporter, ATP-binding protein                                           | 0.165 | 0.000 | 0.001 | 0.000  |
| <b>SMU_1326</b>             | <i>rf2</i>   | peptide chain release factor                                                                 | 0.001 | 0.000 | 0.001 | 0.001  |
| <b>SMU_1327</b><br><b>c</b> | -            | conserved hypothetical protein, 4Fe-4S binding domain                                        | 0.941 | 0.952 | 1.071 | 0.001  |
| <b>SMU_1329</b><br><b>c</b> | <i>paaB</i>  | transposase fragment                                                                         | 1.652 | 1.036 | 0.995 | 0.000  |
| <b>SMU_1330</b><br><b>c</b> | <i>tpn</i>   | transposase, IS1167, fragment                                                                | 0.302 | 0.351 | 0.223 | 0.000  |
| <b>SMU_1331</b><br><b>c</b> | <i>tpn</i>   | transposase                                                                                  | 0.849 | 0.736 | 0.724 | 0.001  |
| <b>SMU_1332</b><br><b>c</b> | <i>tpn</i>   | transposase                                                                                  | 1.012 | 0.843 | 0.591 | 0.000  |
| <b>SMU_1334</b>             | <i>sfp</i>   | phosphopantetheinyl transferase                                                              | 4.529 | 4.344 | 4.590 | 0.001  |
| <b>SMU_1335</b><br><b>c</b> | <i>fabK</i>  | enoyl-acyl carrier protein(ACP) reductase; dioxygenase related to 2-nitropropane dioxygenase | 3.653 | 3.440 | 3.202 | 0.040  |
| <b>SMU_1336</b>             | <i>pksD</i>  | conserved hypothetical protein                                                               | 1.815 | 1.742 | 1.641 | 0.382  |
| <b>SMU_1337</b><br><b>c</b> | -            | alpha/beta superfamily hydrolases                                                            | 4.311 | 4.662 | 5.209 | 0.008  |
| <b>SMU_1338</b><br><b>c</b> | <i>mefE</i>  | ABC transport macrolide permease                                                             | 4.492 | 2.753 | 2.826 | 4.022  |
| <b>SMU_1339</b>             | <i>bacD</i>  | bacitracin synthetase; surfactin synthetase                                                  | 2.479 | 2.885 | 3.143 | 1.188  |
| <b>SMU_133c</b>             | -            | carbohydrate permease; transmembrane efflux protein                                          | 1.788 | 2.210 | 2.287 | 0.001  |
| <b>SMU_134</b>              | -            | transcriptional regulator, TetR/AcrR family                                                  | 2.069 | 0.758 | 0.109 | 0.013  |
| <b>SMU_1340</b>             | <i>bacA2</i> | bacitracin synthetase 1/ tyrocidin synthetase III                                            | 3.083 | 4.117 | 4.056 | 0.194  |

|                             |              |                                                                    |       |       |       |       |
|-----------------------------|--------------|--------------------------------------------------------------------|-------|-------|-------|-------|
| <b>SMU_1341</b><br><b>c</b> | <i>grs</i>   | gramicidin S synthase/mycosubtilin synthetase chain mycB           | 3.948 | 4.555 | 3.968 | 0.234 |
| <b>SMU_1342</b>             | <i>bacA1</i> | bacitracin synthetase                                              | 3.360 | 4.654 | 3.853 | 3.965 |
| <b>SMU_1343</b><br><b>c</b> | <i>pksC</i>  | polyketide synthase                                                | 2.266 | 3.002 | 2.139 | 0.002 |
| <b>SMU_1344</b><br><b>c</b> | <i>fabD</i>  | malonyl CoA-acyl carrier protein transacylase                      | 3.157 | 4.291 | 3.107 | 0.001 |
| <b>SMU_1345</b><br><b>c</b> | <i>ituA</i>  | peptide synthetase similar to mycA                                 | 3.807 | 6.412 | 5.640 | 2.313 |
| <b>SMU_1346</b>             | <i>bacT</i>  | thioesterase II-like protein                                       | 1.845 | 2.207 | 1.481 | 0.002 |
| <b>SMU_1349</b>             | -            | conserved hypothetical protein                                     | 1.867 | 3.798 | 2.296 | 0.000 |
| <b>SMU_135</b>              | <i>mleR</i>  | transcriptional regulator, MleR-related / LysR-related             | 2.122 | 2.536 | 2.575 | 0.001 |
| <b>SMU_1351</b>             | -            | transposase fragment                                               | 1.293 | 0.801 | 0.590 | 0.001 |
| <b>SMU_1352</b>             | -            | transposase                                                        | 1.581 | 1.056 | 1.312 | 0.000 |
| <b>SMU_1353</b>             | -            | transposase                                                        | 0.789 | 1.133 | 1.038 | 0.000 |
| <b>SMU_1354</b><br><b>c</b> | -            | transposase                                                        | 2.966 | 3.411 | 2.677 | 0.501 |
| <b>SMU_1355</b><br><b>c</b> | <i>tpn</i>   | transposase                                                        | 0.627 | 0.641 | 0.562 | 0.000 |
| <b>SMU_1356</b><br><b>c</b> | <i>tpn</i>   | transposase                                                        | 1.549 | 2.006 | 1.795 | 0.003 |
| <b>SMU_1357</b>             | -            | transposase fragment, IS1562 similarity                            | 2.447 | 3.401 | 2.688 | 0.001 |
| <b>SMU_1358</b>             | -            | transposase fragment                                               | 1.945 | 1.226 | 0.605 | 0.000 |
| <b>SMU_1359</b>             | -            | hypothetical protein                                               | 2.635 | 4.027 | 5.109 | 0.002 |
| <b>SMU_1360</b><br><b>c</b> | -            | hypothetical protein                                               | 0.517 | 0.652 | 0.677 | 0.000 |
| <b>SMU_1361</b><br><b>c</b> | <i>yjjB</i>  | transcriptional regulator                                          | 0.808 | 0.315 | 0.309 | 0.001 |
| <b>SMU_1363</b><br><b>c</b> | <i>tpn</i>   | transposase fragment (IS605/IS200-like)                            | 0.495 | 1.031 | 0.618 | 0.000 |
| <b>SMU_1367</b><br><b>c</b> | -            | conserved hypothetical protein                                     | 1.208 | 1.235 | 1.234 | 0.015 |
| <b>SMU_1368</b>             | -            | hypothetical protein                                               | 0.042 | 0.038 | 0.015 | 0.001 |
| <b>SMU_1369</b>             | -            | hypothetical protein                                               | 0.224 | 0.192 | 0.243 | 0.000 |
| <b>SMU_136c</b>             | -            | conserved hypothetical protein; probable transcriptional regulator | 0.686 | 1.183 | 1.074 | 0.014 |
| <b>SMU_137</b>              | <i>mleS</i>  | malolactic enzyme                                                  | 1.276 | 1.447 | 1.327 | 0.002 |
| <b>SMU_1372</b><br><b>c</b> | <i>tpn</i>   | transposase, IS861, IS3 family                                     | 0.515 | 0.796 | 0.745 | 0.000 |
| <b>SMU_1373</b><br><b>c</b> | -            | hypothetical protein                                               | 0.181 | 0.258 | 0.160 | 0.000 |
| <b>SMU_1374</b>             | -            | IS30 transposase related protein                                   | 1.207 | 1.349 | 1.156 | 0.002 |
| <b>SMU_1375</b><br><b>c</b> | <i>yqkA</i>  | conserved hypothetical protein                                     | 1.054 | 1.036 | 0.878 | 0.000 |
| <b>SMU_1377</b><br><b>c</b> | -            | conserved hypothetical protein                                     | 0.410 | 0.446 | 0.338 | 0.000 |
| <b>SMU_1378</b>             | -            | hypothetical protein                                               | 1.054 | 1.141 | 1.278 | 0.003 |
| <b>SMU_138</b>              | <i>mleP</i>  | malate permease/auxin efflux carrier                               | 1.539 | 1.552 | 1.817 | 0.001 |
| <b>SMU_1381</b>             | <i>leuD</i>  | 3-isopropylmalate dehydratase, small subunit                       | 0.766 | 0.620 | 0.682 | 0.002 |
| <b>SMU_1382</b>             | <i>leuC</i>  | alpha-isopropylmalate isomerase large subunit                      | 0.949 | 1.256 | 1.389 | 0.076 |

|                             |             |                                                            |       |       |       |         |
|-----------------------------|-------------|------------------------------------------------------------|-------|-------|-------|---------|
| <b>SMU_1383</b>             | <i>leuB</i> | 3-isopropylmalate dehydrogenase                            | 0.562 | 0.684 | 0.546 | 0.001   |
| <b>SMU_1384</b>             | <i>leuA</i> | 2-isopropylmalate synthase                                 | 1.030 | 1.151 | 1.242 | 0.001   |
| <b>SMU_1386</b>             | <i>urk</i>  | uridine kinase                                             | 1.757 | 1.261 | 1.915 | 0.001   |
| <b>SMU_1387</b>             | <i>mocA</i> | oxidoreductase                                             | 1.053 | 1.271 | 1.044 | 0.001   |
| <b>SMU_1388</b>             | <i>deaD</i> | ATP-dependent RNA helicase, DEAD/DEAH family               | 0.817 | 0.379 | 0.371 | 0.000   |
| <b>SMU_1389</b>             | <i>pckA</i> | phosphoenolpyruvate carboxykinase (ATP)                    | 1.210 | 1.445 | 1.693 | 0.396   |
| <b>SMU_139</b>              | <i>oxdC</i> | oxalate decarboxylase                                      | 1.534 | 1.574 | 1.581 | 0.004   |
| <b>SMU_1390</b>             | -           | conserved hypothetical protein                             | 3.069 | 3.029 | 3.156 | 0.183   |
| <b>SMU_1391</b><br><b>c</b> | -           | hypothetical protein                                       | 2.841 | 4.987 | 5.796 | 0.554   |
| <b>SMU_1392</b><br><b>c</b> | -           | conserved hypothetical protein; possible acetyltransferase | 0.547 | 0.756 | 0.809 | 0.006   |
| <b>SMU_1393</b><br><b>c</b> | -           | conserved hypothetical protein                             | 1.261 | 1.210 | 1.286 | 0.000   |
| <b>SMU_1394</b>             | <i>lepA</i> | GTP-binding protein LepA                                   | 0.784 | 0.382 | 0.613 | 0.031   |
| <b>SMU_1395</b><br><b>c</b> | -           | hypothetical protein                                       | 2.338 | 2.177 | 2.977 | 0.003   |
| <b>SMU_1396</b>             | <i>gbpC</i> | glucan-binding protein C                                   | 1.321 | 1.513 | 1.448 | 0.015   |
| <b>SMU_1397</b><br><b>c</b> | -           | possible transcriptional repressor                         | 2.089 | 2.224 | 2.824 | 0.001   |
| <b>SMU_1398</b>             | <i>irvR</i> | repressor protein - phage associated                       | 1.965 | 2.652 | 1.892 | 317.744 |
| <b>SMU_1399</b>             | -           | hypothetical protein                                       | 0.445 | 0.693 | 0.529 | 0.003   |
| <b>SMU_14</b>               | <i>hprT</i> | hypoxanthine-guanine phosphoribosyltransferase             | 0.359 | 0.028 | 0.002 | 0.001   |
| <b>SMU_140</b>              | <i>gshR</i> | glutathione reductase                                      | 1.361 | 1.654 | 1.471 | 0.001   |
| <b>SMU_1400</b><br><b>c</b> | -           | conserved hypothetical protein                             | 0.643 | 0.582 | 0.689 | 0.000   |
| <b>SMU_1402</b><br><b>c</b> | -           | conserved hypothetical protein                             | 0.708 | 1.225 | 1.158 | 0.002   |
| <b>SMU_1403</b><br><b>c</b> | -           | conserved hypothetical protein                             | 1.304 | 1.906 | 2.077 | 0.039   |
| <b>SMU_1404</b><br><b>c</b> | -           | conserved hypothetical protein                             | 2.117 | 2.130 | 2.323 | 0.044   |
| <b>SMU_1405</b><br><b>c</b> | <i>cas9</i> | conserved hypothetical protein                             | 2.093 | 2.490 | 2.560 | 1.318   |
| <b>SMU_1406</b><br><b>c</b> | -           | conserved hypothetical protein (possible oxidoreductase)   | 0.573 | 0.557 | 0.557 | 0.008   |
| <b>SMU_1409</b><br><b>c</b> | <i>bgIC</i> | transcriptional regulator                                  | 1.294 | 1.290 | 1.329 | 0.000   |
| <b>SMU_141</b>              | -           | conserved hypothetical protein                             | 2.306 | 2.540 | 2.444 | 0.265   |
| <b>SMU_1410</b>             | <i>frdC</i> | fumarate reductase                                         | 1.640 | 1.519 | 1.298 | 0.025   |
| <b>SMU_1411</b>             | -           | conserved hypothetical protein                             | 1.349 | 1.797 | 1.866 | 7.515   |
| <b>SMU_1412</b><br><b>c</b> | <i>yhcA</i> | ABC transporter, ATP-binding and permease fusion protein   | 1.414 | 1.525 | 1.603 | 0.075   |
| <b>SMU_1414</b><br><b>c</b> | -           | conserved hypothetical protein                             | 0.777 | 0.612 | 0.254 | 0.004   |
| <b>SMU_1415</b><br><b>c</b> | <i>nagD</i> | N-acetylglucosamine catabolic protein                      | 1.714 | 0.301 | 0.883 | 0.001   |
| <b>SMU_1416</b><br><b>c</b> | <i>mutT</i> | mutator protein MutT                                       | 1.206 | 1.342 | 1.198 | 0.000   |
| <b>SMU_1417</b><br><b>c</b> | -           | acyl-ACP thioesterase                                      | 1.606 | 2.173 | 0.930 | 0.001   |
| <b>SMU_1418</b>             | <i>hemN</i> | coproporphyrinogen III oxidase                             | 1.137 | 0.534 | 0.658 | 0.001   |

|                             |              |                                                                         |       |        |        |        |
|-----------------------------|--------------|-------------------------------------------------------------------------|-------|--------|--------|--------|
| <b>SMU_1419</b>             | <i>acrR2</i> | transcriptional regulator                                               | 1.289 | 0.868  | 1.163  | 0.001  |
| <b>SMU_1420</b>             | <i>qr1</i>   | NADPH-quinone reductase                                                 | 0.769 | 0.900  | 0.910  | 0.001  |
| <b>SMU_1421</b>             | <i>pdhC</i>  | dihydrolipoamide acetyltransferase (acetoin dehydrogenase E2 component) | 1.468 | 1.846  | 1.720  | 0.133  |
| <b>SMU_1422</b>             | <i>pdhB</i>  | acetoin dehydrogenase E1 component                                      | 1.320 | 1.807  | 1.614  | 0.009  |
| <b>SMU_1423</b>             | <i>pdhA</i>  | acetoin dehydrogenase E1 component                                      | 1.187 | 1.144  | 1.387  | 0.000  |
| <b>SMU_1424</b>             | <i>pdhD</i>  | dihydrolipoamide dehydrogenase                                          | 1.112 | 1.250  | 1.208  | 0.001  |
| <b>SMU_1425</b>             | <i>clpB</i>  | ATP-dependent Clp protease, ATP-binding subunit ClpB                    | 0.863 | 1.120  | 1.216  | 0.009  |
| <b>SMU_1426</b><br><b>c</b> | <i>glmM</i>  | phosphoglucosamine mutase (phosphoacetylglucosamine mutase)             | 0.001 | 0.001  | 0.000  | 0.000  |
| <b>SMU_1427</b><br><b>c</b> | -            | conserved hypothetical protein                                          | 3.225 | 2.935  | 1.895  | 0.001  |
| <b>SMU_1428</b><br><b>c</b> | -            | conserved hypothetical protein                                          | 0.034 | 0.007  | 0.017  | 0.002  |
| <b>SMU_1429</b>             | <i>murC2</i> | UDP-N-acetylmuramyl tripeptide synthetase                               | 0.002 | 0.000  | 0.001  | 0.011  |
| <b>SMU_1430</b>             | <i>cobQ</i>  | cobyrinic acid synthase                                                 | 0.687 | 0.284  | 0.287  | 0.001  |
| <b>SMU_1431</b><br><b>c</b> | -            | ABC transporter, ATP-binding protein                                    | 2.328 | 2.826  | 2.030  | 17.776 |
| <b>SMU_1432</b><br><b>c</b> | <i>bgc</i>   | glycosyl hydrolases family 8 protein; possible beta-glucanase           | 4.900 | 10.070 | 6.501  | 0.001  |
| <b>SMU_1434</b><br><b>c</b> | <i>icaA</i>  | glycosyl transferase                                                    | 5.328 | 8.477  | 8.246  | 0.938  |
| <b>SMU_1435</b><br><b>c</b> | -            | hypothetical protein                                                    | 3.631 | 6.809  | 6.002  | 0.003  |
| <b>SMU_1436</b><br><b>c</b> | -            | conserved hypothetical protein                                          | 6.659 | 8.276  | 10.636 | 0.128  |
| <b>SMU_1437</b>             | <i>epsC</i>  | UDP-N-acetylglucosamine 2-epimerase                                     | 2.821 | 4.219  | 3.140  | 0.030  |
| <b>SMU_1438</b><br><b>c</b> | <i>prtB</i>  | conserved hypothetical protein; possible protease                       | 1.771 | 1.937  | 1.648  | 0.016  |
| <b>SMU_143c</b>             | <i>def</i>   | polypeptide deformylase (PDF)                                           | 0.055 | 0.043  | 0.026  | 0.001  |
| <b>SMU_1442</b><br><b>c</b> | -            | conserved hypothetical protein                                          | 1.626 | 2.143  | 1.518  | 0.001  |
| <b>SMU_1443</b><br><b>c</b> | <i>estA</i>  | tributylin esterase                                                     | 1.531 | 1.493  | 2.468  | 0.014  |
| <b>SMU_1444</b><br><b>c</b> | <i>yqgA</i>  | metallo-beta-lactamase superfamily protein                              | 0.098 | 0.159  | 0.200  | 0.001  |
| <b>SMU_1445</b><br><b>c</b> | <i>livG</i>  | ABC transporter, ATP-binding protein                                    | 1.133 | 1.440  | 1.740  | 0.000  |
| <b>SMU_1446</b><br><b>c</b> | -            | ABC transporter, permease                                               | 1.272 | 1.532  | 1.636  | 0.002  |
| <b>SMU_1447</b><br><b>c</b> | -            | ABC transporter, substrate-binding protein                              | 1.044 | 1.475  | 1.113  | 11.871 |
| <b>SMU_1449</b>             | <i>fbp</i>   | fibronectin-binding, fibrinogen-binding protein-A                       | 0.804 | 0.444  | 0.429  | 0.012  |
| <b>SMU_144c</b>             | -            | possible transcriptional regulator                                      | 1.836 | 2.371  | 3.161  | 0.001  |
| <b>SMU_145</b>              | -            | major facilitator superfamily transporter, efflux protein               | 2.660 | 1.957  | 2.629  | 0.001  |
| <b>SMU_1450</b>             | <i>aapA</i>  | amino acid permease                                                     | 0.744 | 0.633  | 1.313  | 0.000  |

|                       |             |                                                                 |       |       |       |       |
|-----------------------|-------------|-----------------------------------------------------------------|-------|-------|-------|-------|
| <b>SMU_1451</b>       | <i>aldB</i> | alpha-acetolactate decarboxylase                                | 1.431 | 1.296 | 0.292 | 0.001 |
| <b>SMU_1452</b>       | <i>alsS</i> | alpha-acetolactate synthase                                     | 1.468 | 1.375 | 0.134 | 2.689 |
| <b>SMU_1453<br/>c</b> | -           | conserved hypothetical protein, tetratricopeptide repeat family | 2.526 | 2.475 | 0.966 | 0.000 |
| <b>SMU_1454<br/>c</b> | <i>yjlI</i> | conserved hypothetical protein, possible permease               | 1.692 | 1.905 | 0.966 | 0.002 |
| <b>SMU_1455</b>       | <i>mutX</i> | mutator mutX protein                                            | 1.062 | 1.050 | 0.207 | 0.000 |
| <b>SMU_1456<br/>c</b> | -           | hypothetical protein                                            | 0.246 | 0.446 | 0.353 | 0.002 |
| <b>SMU_1457</b>       | <i>rmlB</i> | dTDP-glucose-4,6-dehydratase                                    | 0.000 | 0.000 | 0.000 | 0.021 |
| <b>SMU_1459<br/>c</b> | -           | conserved hypothetical protein                                  | 0.836 | 0.514 | 0.613 | 0.000 |
| <b>SMU_1460</b>       | <i>rmlC</i> | dTDP-4-dehydrorhamnose 3,5-epimerase                            | 0.000 | 0.003 | 0.001 | 0.042 |
| <b>SMU_1461</b>       | <i>rmlA</i> | glucose-1-phosphate thymidyltransferase                         | 0.000 | 0.001 | 0.001 | 0.000 |
| <b>SMU_1462<br/>c</b> | -           | oxidoreductase, DadA family protein/D-amino acid oxidase        | 0.915 | 0.616 | 0.670 | 0.001 |
| <b>SMU_1463<br/>c</b> | -           | conserved hypothetical protein, NIF3-related                    | 0.612 | 0.464 | 0.550 | 0.004 |
| <b>SMU_1464<br/>c</b> | <i>orf3</i> | conserved hypothetical protein                                  | 0.045 | 0.000 | 0.000 | 0.000 |
| <b>SMU_1465<br/>c</b> | <i>dnaD</i> | DNA replication protein DnaD                                    | 0.000 | 0.000 | 0.000 | 0.008 |
| <b>SMU_1466</b>       | <i>metA</i> | homoserine O-succinyltransferase                                | 0.540 | 0.456 | 0.857 | 0.000 |
| <b>SMU_1467</b>       | <i>apt</i>  | adenine phosphoribosyltransferase                               | 1.366 | 0.357 | 0.003 | 0.000 |
| <b>SMU_1470<br/>c</b> | -           | conserved hypothetical protein                                  | 1.728 | 1.636 | 1.545 | 0.000 |
| <b>SMU_1471<br/>c</b> | -           | conserved hypothetical protein                                  | 1.921 | 1.757 | 1.736 | 0.003 |
| <b>SMU_1472</b>       | <i>recJ</i> | single-strand DNA-specific exonuclease                          | 1.117 | 0.639 | 0.845 | 0.001 |
| <b>SMU_1473<br/>c</b> | -           | oxidoreductase, short chain dehydrogenase/reductase family      | 1.424 | 1.264 | 1.127 | 0.001 |
| <b>SMU_1474<br/>c</b> | <i>rnz</i>  | ribonuclease Z                                                  | 0.001 | 0.001 | 0.000 | 0.001 |
| <b>SMU_1475<br/>c</b> | -           | conserved hypothetical protein                                  | 0.389 | 0.062 | 0.040 | 0.001 |
| <b>SMU_1476<br/>c</b> | <i>hflX</i> | GTP-binding protein                                             | 0.751 | 0.037 | 0.059 | 0.000 |
| <b>SMU_1477</b>       | <i>miaA</i> | tRNA isopentenylpyrophosphate transferase                       | 0.328 | 0.072 | 0.060 | 0.001 |
| <b>SMU_1479</b>       | -           | conserved hypothetical protein                                  | 0.633 | 0.579 | 0.938 | 0.061 |
| <b>SMU_148</b>        | <i>adhE</i> | alcohol-acetaldehyde dehydrogenase                              | 1.541 | 1.369 | 0.212 | 0.003 |
| <b>SMU_1480</b>       | -           | hypothetical protein                                            | 2.312 | 2.685 | 2.447 | 0.001 |
| <b>SMU_1482<br/>c</b> | -           | conserved hypothetical protein                                  | 0.820 | 1.238 | 1.292 | 0.000 |
| <b>SMU_1483<br/>c</b> | -           | conserved hypothetical protein (possible acetyltransferase)     | 1.630 | 2.252 | 2.495 | 0.002 |
| <b>SMU_1484<br/>c</b> | -           | conserved hypothetical protein                                  | 1.103 | 1.401 | 1.642 | 0.021 |
| <b>SMU_1485<br/>c</b> | -           | conserved hypothetical protein (possible endonuclease)          | 1.626 | 2.099 | 2.401 | 0.002 |

|                             |             |                                                         |       |        |        |       |
|-----------------------------|-------------|---------------------------------------------------------|-------|--------|--------|-------|
| <b>SMU_1486</b><br><b>c</b> | -           | histidinol phosphatase                                  | 1.440 | 0.936  | 1.290  | 0.001 |
| <b>SMU_1487</b>             | -           | conserved hypothetical protein                          | 0.908 | 1.101  | 1.234  | 0.000 |
| <b>SMU_1488</b><br><b>c</b> | -           | conserved hypothetical protein                          | 2.294 | 2.611  | 1.999  | 0.000 |
| <b>SMU_1489</b>             | <i>lacX</i> | aldose 1-epimerase                                      | 0.880 | 1.035  | 1.343  | 0.000 |
| <b>SMU_149</b>              | -           | transposase fragment (IS605/IS200-like)                 | 3.785 | 4.209  | 4.685  | 0.002 |
| <b>SMU_1490</b>             | <i>lacG</i> | phospho-beta-D-galactosidase                            | 1.254 | 1.478  | 1.549  | 1.540 |
| <b>SMU_1491</b>             | <i>lacE</i> | PTS system, lactose-specific component IIBC             | 1.029 | 1.269  | 2.147  | 0.000 |
| <b>SMU_1492</b>             | <i>lacF</i> | PTS system, cellobiose-specific IIA component           | 2.002 | 2.103  | 2.302  | 0.000 |
| <b>SMU_1493</b>             | <i>lacD</i> | tagatose-1,6-bisphosphate aldolase                      | 0.701 | 0.958  | 1.528  | 0.000 |
| <b>SMU_1494</b>             | <i>lacC</i> | tagatose-6-phosphate kinase                             | 0.552 | 0.394  | 0.436  | 0.010 |
| <b>SMU_1495</b>             | <i>lacB</i> | galactose-6-phosphate isomerase                         | 2.718 | 2.067  | 3.192  | 0.000 |
| <b>SMU_1496</b>             | <i>lacA</i> | galactose-6-phosphate isomerase                         | 0.867 | 0.215  | 1.655  | 0.001 |
| <b>SMU_1498</b>             | <i>lacR</i> | lactose phosphotransferase system repressor             | 0.632 | 0.113  | 0.539  | 0.006 |
| <b>SMU_1499</b>             | <i>rexA</i> | ATP-dependent exonuclease subunit A                     | 0.711 | 0.017  | 0.023  | 0.001 |
| <b>SMU_15</b>               | <i>ftsH</i> | cell division protein FtsH                              | 0.003 | 0.001  | 0.001  | 0.001 |
| <b>SMU_150</b>              | <i>nImA</i> | non-lantibiotic mutacin IV A                            | 1.874 | 1.620  | 1.229  | 0.001 |
| <b>SMU_1500</b>             | <i>rexB</i> | ATP-dependent exonuclease subunit B                     | 0.569 | 0.004  | 0.001  | 0.001 |
| <b>SMU_1502</b><br><b>c</b> | -           | conserved hypothetical protein                          | 4.385 | 6.335  | 6.528  | 0.000 |
| <b>SMU_1504</b><br><b>c</b> | -           | hypothetical protein                                    | 1.465 | 1.476  | 2.075  | 0.002 |
| <b>SMU_1506</b><br><b>c</b> | -           | conserved hypothetical protein                          | 1.792 | 2.181  | 2.495  | 0.371 |
| <b>SMU_1507</b><br><b>c</b> | -           | hypothetical protein                                    | 9.314 | 11.744 | 15.025 | 3.289 |
| <b>SMU_1508</b><br><b>c</b> | -           | coenzyme PQQ synthesis protein /possible oxidoreductase | 2.729 | 3.605  | 4.056  | 0.648 |
| <b>SMU_1509</b>             | <i>rgg</i>  | transcriptional regulator                               | 1.915 | 2.231  | 2.304  | 0.204 |
| <b>SMU_151</b>              | <i>nImB</i> | non-lantibiotic mutacin IV B                            | 4.196 | 3.585  | 4.183  | 0.001 |
| <b>SMU_1510</b>             | <i>syfB</i> | phenylalanyl-tRNA synthetase, beta subunit              | 0.001 | 0.001  | 0.000  | 0.001 |
| <b>SMU_1511</b><br><b>c</b> | -           | acetyltransferase; possible transcriptional repressor   | 0.253 | 0.382  | 0.407  | 0.003 |
| <b>SMU_1512</b>             | <i>pheS</i> | phenylalanyl-tRNA synthetase, alpha subunit             | 0.000 | 0.000  | 0.001  | 0.351 |
| <b>SMU_1513</b>             | <i>smc</i>  | chromosome segregation SMC protein                      | 0.961 | 0.178  | 0.067  | 0.000 |
| <b>SMU_1514</b>             | <i>rnc</i>  | ribonuclease III                                        | 0.067 | 0.001  | 0.006  | 0.002 |
| <b>SMU_1515</b>             | <i>covX</i> | gtfB/C regulator, metallo-beta-lactamase superfamily    | 1.052 | 0.447  | 0.536  | 0.000 |
| <b>SMU_1516</b>             | <i>covS</i> | two-component sensor histidine kinase                   | 0.964 | 0.024  | 0.245  | 0.001 |
| <b>SMU_1517</b>             | <i>covR</i> | two-component response regulator                        | 0.256 | 0.188  | 0.130  | 0.001 |



|                       |             |                                                                        |       |       |       |       |
|-----------------------|-------------|------------------------------------------------------------------------|-------|-------|-------|-------|
| <b>SMU_1519</b>       | <i>glnQ</i> | glutamine ABC transport, ATP-binding protein                           | 1.364 | 0.241 | 0.849 | 0.000 |
| <b>SMU_152</b>        | -           | hypothetical protein                                                   | 3.378 | 3.124 | 3.932 | 0.043 |
| <b>SMU_1520</b>       | <i>glnH</i> | amino acid ABC transporter, substrate-binding protein                  | 1.554 | 0.225 | 0.914 | 0.001 |
| <b>SMU_1521</b>       | <i>glnM</i> | amino acid (glutamine) ABC transporter permease                        | 2.358 | 0.400 | 1.071 | 0.004 |
| <b>SMU_1522</b>       | <i>glnP</i> | amino acid (glutamine) ABC transporter permease                        | 1.217 | 0.190 | 0.490 | 0.003 |
| <b>SMU_1523</b>       | <i>endA</i> | competence associated membrane nuclease (DNA-entry nuclease)           | 2.093 | 1.029 | 1.207 | 0.001 |
| <b>SMU_1524<br/>c</b> | <i>epuA</i> | conserved hypothetical protein                                         | 0.682 | 0.003 | 0.030 | 0.001 |
| <b>SMU_1525</b>       | <i>murA</i> | UDP-N-acetylglucosamine 1-carboxyvinyltransferase                      | 1.232 | 0.766 | 0.694 | 0.000 |
| <b>SMU_1526<br/>c</b> | -           | conserved hypothetical protein                                         | 1.603 | 0.596 | 0.996 | 0.005 |
| <b>SMU_1527</b>       | <i>atpA</i> | proton-translocating ATPase epsilon subunit                            | 0.141 | 0.007 | 0.009 | 0.000 |
| <b>SMU_1528</b>       | <i>atpB</i> | ATPase beta subunit                                                    | 0.000 | 0.000 | 0.000 | 0.000 |
| <b>SMU_1529</b>       | <i>atpC</i> | ATPase, gamma subunit                                                  | 0.007 | 0.002 | 0.001 | 0.000 |
| <b>SMU_153</b>        | -           | hypothetical protein                                                   | 2.010 | 3.050 | 4.120 | 0.003 |
| <b>SMU_1530</b>       | <i>atpD</i> | ATP synthase alpha subunit                                             | 0.002 | 0.000 | 0.001 | 0.001 |
| <b>SMU_1531</b>       | <i>atpE</i> | ATPase delta subunit                                                   | 0.019 | 0.024 | 0.006 | 0.001 |
| <b>SMU_1532</b>       | <i>atpF</i> | ATPase, b subunit                                                      | 0.014 | 0.000 | 0.001 | 0.000 |
| <b>SMU_1533</b>       | <i>atpG</i> | ATP synthase subunit A                                                 | 0.211 | 0.096 | 0.077 | 0.001 |
| <b>SMU_1534</b>       | <i>atpH</i> | ATPase, c subunit                                                      | 0.005 | 0.000 | 0.000 | 0.001 |
| <b>SMU_1535</b>       | <i>phsG</i> | glycogen phosphorylase                                                 | 1.900 | 2.145 | 2.179 | 0.078 |
| <b>SMU_1536</b>       | <i>glgA</i> | glycogen synthase                                                      | 1.467 | 1.358 | 1.434 | 0.001 |
| <b>SMU_1537</b>       | <i>glgD</i> | glycogen biosynthesis protein                                          | 2.304 | 2.863 | 3.014 | 0.003 |
| <b>SMU_1538</b>       | <i>glgC</i> | glucose-1-phosphate adenylyltransferase                                | 2.149 | 2.659 | 2.884 | 0.009 |
| <b>SMU_1539</b>       | <i>glgB</i> | 1,4-alpha-glucan branching enzyme                                      | 1.866 | 2.123 | 2.346 | 0.001 |
| <b>SMU_154</b>        | <i>rpsO</i> | 30S ribosomal protein S15                                              | 0.027 | 0.000 | 0.002 | 0.000 |
| <b>SMU_1541</b>       | <i>pulA</i> | pullulanase                                                            | 3.025 | 2.595 | 1.988 | 0.191 |
| <b>SMU_1542<br/>c</b> | -           | conserved hypothetical protein, diacylglycerol kinase catalytic domain | 0.136 | 0.004 | 0.003 | 0.003 |
| <b>SMU_1543</b>       | <i>ligA</i> | DNA ligase                                                             | 0.000 | 0.001 | 0.000 | 0.001 |
| <b>SMU_1545<br/>c</b> | -           | conserved hypothetical protein                                         | 4.204 | 4.187 | 4.207 | 0.721 |
| <b>SMU_1546</b>       | -           | conserved hypothetical protein                                         | 1.437 | 0.021 | 0.002 | 0.013 |
| <b>SMU_1547<br/>c</b> | <i>rr11</i> | response regulator                                                     | 2.329 | 2.163 | 1.706 | 0.000 |
| <b>SMU_1548<br/>c</b> | <i>hk11</i> | sensor histidine kinase                                                | 1.362 | 1.460 | 1.018 | 0.001 |
| <b>SMU_155</b>        | <i>pnpA</i> | polyribonucleotide nucleotidyltransferase alpha subunit (PNPase)       | 0.519 | 0.090 | 0.164 | 0.021 |
| <b>SMU_1550<br/>c</b> | -           | ABC transporter, membrane spanning permease                            | 3.600 | 3.983 | 3.300 | 2.852 |
| <b>SMU_1551<br/>c</b> | <i>yvfR</i> | ABC transporter, ATP-binding protein                                   | 3.498 | 3.912 | 2.493 | 1.047 |

|                             |             |                                                         |       |       |       |       |
|-----------------------------|-------------|---------------------------------------------------------|-------|-------|-------|-------|
| <b>SMU_1552</b><br><b>c</b> | -           | hypothetical protein                                    | 1.717 | 2.121 | 1.414 | 0.000 |
| <b>SMU_1553</b><br><b>c</b> | -           | hypothetical protein                                    | 2.385 | 2.404 | 2.078 | 0.002 |
| <b>SMU_1554</b><br><b>c</b> | -           | conserved hypothetical protein                          | 3.501 | 4.022 | 2.419 | 0.001 |
| <b>SMU_1555</b><br><b>c</b> | -           | ribonuclease BN-like family protein                     | 2.261 | 2.353 | 1.402 | 0.003 |
| <b>SMU_1556</b>             | <i>map</i>  | methionine aminopeptidase                               | 0.088 | 0.026 | 0.014 | 0.000 |
| <b>SMU_1557</b><br><b>c</b> | -           | conserved hypothetical protein, DRTGG and CBS domains   | 0.201 | 0.031 | 0.101 | 0.000 |
| <b>SMU_1558</b><br><b>c</b> | <i>yhdC</i> | acetyltransferase, GNAT family                          | 0.641 | 0.400 | 0.479 | 0.000 |
| <b>SMU_156</b>              | -           | conserved hypothetical protein                          | 0.738 | 0.677 | 0.365 | 0.001 |
| <b>SMU_1560</b>             | -           | conserved hypothetical protein                          | 0.812 | 0.660 | 1.534 | 0.018 |
| <b>SMU_1561</b>             | <i>trkB</i> | potassium uptake protein B                              | 1.485 | 1.261 | 1.764 | 0.256 |
| <b>SMU_1562</b>             | <i>trk</i>  | potassium uptake protein A                              | 1.182 | 0.968 | 1.029 | 0.000 |
| <b>SMU_1563</b>             | <i>pacL</i> | cation-transporting P-ATPase                            | 1.170 | 1.021 | 1.038 | 0.008 |
| <b>SMU_1564</b>             | <i>glgP</i> | glycogen phosphorylase                                  | 1.554 | 1.678 | 1.180 | 0.002 |
| <b>SMU_1565</b>             | <i>malQ</i> | 4-alpha-glucanotransferase                              | 0.283 | 0.092 | 0.025 | 0.000 |
| <b>SMU_1566</b>             | <i>malR</i> | maltose operon transcriptional repressor                | 1.424 | 0.047 | 0.025 | 0.001 |
| <b>SMU_1568</b>             | <i>malX</i> | maltose / maltodextrin-binding protein                  | 1.641 | 1.914 | 1.604 | 0.124 |
| <b>SMU_1569</b>             | <i>malF</i> | maltodextrin ABC transport system permease              | 1.371 | 1.931 | 1.607 | 0.001 |
| <b>SMU_157</b>              | <i>cysE</i> | serine O-acetyltransferase                              | 0.057 | 0.010 | 0.011 | 0.000 |
| <b>SMU_1570</b>             | <i>malG</i> | maltose / maltodextrin ABC transport system (permease)  | 2.200 | 3.270 | 2.872 | 0.004 |
| <b>SMU_1571</b>             | <i>msmK</i> | ABC-type transport system ATP-binding protein (maltose) | 1.204 | 1.542 | 1.654 | 0.001 |
| <b>SMU_1572</b>             | <i>murZ</i> | UDP-N-acetylglucosamine 1-carboxyvinyltransferase       | 1.808 | 3.175 | 1.132 | 0.001 |
| <b>SMU_1573</b>             | <i>metK</i> | S-adenosylmethionine synthetase                         | 0.000 | 0.000 | 0.000 | 0.000 |
| <b>SMU_1574</b><br><b>c</b> | -           | conserved hypothetical protein                          | 2.601 | 3.837 | 2.819 | 4.556 |
| <b>SMU_1575</b><br><b>c</b> | -           | hypothetical protein                                    | 2.039 | 3.326 | 3.356 | 1.010 |
| <b>SMU_1576</b><br><b>c</b> | -           | hypothetical protein                                    | 4.849 | 7.855 | 6.329 | 0.009 |
| <b>SMU_1577</b><br><b>c</b> | -           | conserved hypothetical protein                          | 4.545 | 5.156 | 4.572 | 0.074 |
| <b>SMU_1578</b>             | <i>birA</i> | biotin--[acetyl-CoA-carboxylase] ligase                 | 0.132 | 0.029 | 0.051 | 0.003 |
| <b>SMU_1579</b>             | -           | hypothetical protein                                    | 2.444 | 2.613 | 2.814 | 0.000 |
| <b>SMU_158</b>              | <i>cysS</i> | cysteinyI-tRNA synthetase                               | 0.007 | 0.002 | 0.001 | 0.001 |
| <b>SMU_1581</b>             | <i>dnaX</i> | DNA polymerase III subunits gamma and tau               | 0.000 | 0.000 | 0.000 | 0.002 |
| <b>SMU_1582</b><br><b>c</b> | -           | conserved hypothetical protein                          | 0.995 | 1.165 | 1.380 | 0.000 |
| <b>SMU_1584</b><br><b>c</b> | <i>mycA</i> | 67 kDa myosin-crossreactive streptococcal antigen       | 1.175 | 0.916 | 1.159 | 0.040 |
| <b>SMU_1585</b><br><b>c</b> | -           | transcriptional regulator                               | 1.129 | 1.278 | 1.251 | 0.021 |
| <b>SMU_1586</b>             | <i>thrS</i> | threonyI-tRNA synthetase                                | 0.026 | 0.024 | 0.022 | 0.013 |

|                             |             |                                                                           |       |       |       |       |
|-----------------------------|-------------|---------------------------------------------------------------------------|-------|-------|-------|-------|
| <b>SMU_1587</b><br><b>c</b> | -           | hypothetical protein                                                      | 0.684 | 0.461 | 0.556 | 0.001 |
| <b>SMU_1588</b><br><b>c</b> | <i>rfaG</i> | glucosyl transferase, family 1                                            | 0.017 | 0.003 | 0.003 | 0.008 |
| <b>SMU_1589</b><br><b>c</b> | <i>cpoA</i> | glucosyl transferase, family 1                                            | 0.087 | 0.014 | 0.012 | 0.001 |
| <b>SMU_159</b>              | -           | conserved hypothetical protein                                            | 1.636 | 0.618 | 0.840 | 0.001 |
| <b>SMU_1590</b>             | <i>amyA</i> | intracellular $\alpha$ -amylase                                           | 1.379 | 1.487 | 1.925 | 1.643 |
| <b>SMU_1591</b>             | <i>ccpA</i> | catabolite control protein A                                              | 0.663 | 0.024 | 0.588 | 0.001 |
| <b>SMU_1592</b>             | <i>pepQ</i> | proline dipeptidase                                                       | 0.232 | 0.124 | 0.144 | 0.000 |
| <b>SMU_1593</b><br><b>c</b> | -           | conserved hypothetical protein (possible CDP-diglyceride synthetase)      | 0.830 | 0.689 | 0.835 | 0.001 |
| <b>SMU_1595</b>             | <i>cah</i>  | carbonic anhydrase (carbonate dehydratase)                                | 0.910 | 1.446 | 1.272 | 0.001 |
| <b>SMU_1596</b>             | <i>celB</i> | PTS system, cellobiose-specific IIC component                             | 2.262 | 2.927 | 3.704 | 0.007 |
| <b>SMU_1597</b><br><b>c</b> | -           | conserved hypothetical protein                                            | 2.645 | 3.106 | 3.694 | 0.001 |
| <b>SMU_1598</b>             | <i>celC</i> | PTS system IIA component, required for cellobiose uptake and metabolism   | 1.394 | 1.238 | 0.718 | 0.001 |
| <b>SMU_1599</b>             | <i>celR</i> | transcriptional regulator, required for cellobiose uptake and metabolism  | 2.040 | 2.392 | 2.341 | 0.098 |
| <b>SMU_16</b>               | -           | amino acid permease                                                       | 1.231 | 1.484 | 1.593 | 0.002 |
| <b>SMU_160</b>              | -           | conserved hypothetical protein                                            | 1.441 | 1.009 | 0.890 | 0.164 |
| <b>SMU_1600</b>             | <i>celB</i> | PTS system IIB component, required for cellobiose uptake and metabolism   | 1.658 | 1.203 | 0.993 | 0.000 |
| <b>SMU_1601</b>             | <i>bgl</i>  | 6-phospho-beta-glucosidase, required for cellobiose uptake and metabolism | 2.006 | 2.346 | 2.705 | 0.000 |
| <b>SMU_1602</b>             | <i>frp</i>  | NAD(P)H-flavin oxidoreductase                                             | 0.997 | 1.196 | 1.647 | 0.001 |
| <b>SMU_1603</b>             | <i>lguL</i> | lactoylglutathione lyase                                                  | 1.883 | 1.749 | 1.337 | 0.000 |
| <b>SMU_1604</b><br><b>c</b> | -           | conserved hypothetical protein                                            | 1.969 | 0.825 | 0.591 | 0.002 |
| <b>SMU_1605</b>             | -           | MDR-type permease;transmembrane efflux protein                            | 2.645 | 2.293 | 2.221 | 0.190 |
| <b>SMU_1606</b>             | <i>smpB</i> | SsrA-binding protein (small protein B)                                    | 0.579 | 0.005 | 0.051 | 0.000 |
| <b>SMU_1607</b>             | <i>vacB</i> | exoribonuclease R                                                         | 1.337 | 0.503 | 0.687 | 0.000 |
| <b>SMU_1609</b><br><b>c</b> | <i>secG</i> | preprotein translocase, SecG subunit                                      | 0.004 | 0.006 | 0.005 | 0.002 |
| <b>SMU_161</b>              | -           | transcriptional regulator (MerR family?)                                  | 1.379 | 1.498 | 0.934 | 0.001 |
| <b>SMU_1610</b>             | <i>rpmG</i> | 50S ribosomal protein L33                                                 | 1.605 | 1.464 | 2.213 | 0.000 |
| <b>SMU_1611</b><br><b>c</b> | <i>pmrA</i> | multi-drug resistance efflux pump, major facilitator superfamily          | 1.809 | 1.383 | 1.767 | 0.002 |
| <b>SMU_1612</b><br><b>c</b> | -           | conserved hypothetical protein                                            | 2.595 | 1.015 | 1.468 | 0.000 |
| <b>SMU_1613</b><br><b>c</b> | -           | dephospho-CoA kinase                                                      | 0.001 | 0.000 | 0.000 | 0.000 |

|                       |             |                                                                      |       |       |       |        |
|-----------------------|-------------|----------------------------------------------------------------------|-------|-------|-------|--------|
| <b>SMU_1614</b>       | <i>fpg</i>  | formamidopyrimidine-DNA glycosylase                                  | 0.498 | 0.384 | 0.424 | 0.216  |
| <b>SMU_1615<br/>c</b> | -           | conserved hypothetical protein                                       | 1.356 | 2.054 | 1.775 | 0.001  |
| <b>SMU_1616<br/>c</b> | -           | phosphohydrolase MutT/nudix family protein                           | 0.265 | 0.295 | 0.363 | 0.002  |
| <b>SMU_1617</b>       | <i>era</i>  | GTP-binding protein era homolog.                                     | 0.022 | 0.023 | 0.052 | 0.004  |
| <b>SMU_1618</b>       | <i>dgk</i>  | diacylglycerol kinase                                                | 0.005 | 0.004 | 0.001 | 0.001  |
| <b>SMU_1619<br/>c</b> | -           | conserved hypothetical protein                                       | 0.286 | 0.383 | 0.379 | 0.008  |
| <b>SMU_1620</b>       | <i>phoH</i> | phosphate starvation-induced protein                                 | 1.208 | 1.524 | 1.221 | 0.221  |
| <b>SMU_1621<br/>c</b> | -           | conserved hypothetical protein                                       | 1.306 | 1.516 | 0.747 | 0.001  |
| <b>SMU_1622</b>       | <i>msrA</i> | peptide methionine sulfoxide reductase A                             | 1.737 | 2.717 | 2.314 | 0.000  |
| <b>SMU_1623<br/>c</b> | -           | conserved hypothetical protein                                       | 1.211 | 0.721 | 0.692 | 0.001  |
| <b>SMU_1624</b>       | <i>rrf1</i> | ribosome recycling factor                                            | 0.037 | 0.000 | 0.002 | 0.000  |
| <b>SMU_1625</b>       | <i>pyrH</i> | uridylate kinase (UMP-kinase)                                        | 0.000 | 0.001 | 0.000 | 0.000  |
| <b>SMU_1626</b>       | <i>rplA</i> | 50S ribosomal protein L1                                             | 0.000 | 0.001 | 0.000 | 0.000  |
| <b>SMU_1627</b>       | <i>rplK</i> | 50S ribosomal protein L11                                            | 0.000 | 0.000 | 0.000 | 0.000  |
| <b>SMU_1628</b>       | -           | conserved hypothetical protein                                       | 3.183 | 4.736 | 4.914 | 0.001  |
| <b>SMU_1629<br/>c</b> | -           | cell division protein                                                | 0.058 | 0.007 | 0.001 | 0.000  |
| <b>SMU_162c</b>       | -           | conserved hypothetical protein                                       | 1.736 | 2.743 | 1.850 | 0.036  |
| <b>SMU_1631</b>       | <i>ppiA</i> | peptidyl-prolyl cis-trans isomerase; cyclophilin                     | 2.482 | 1.884 | 2.955 | 0.002  |
| <b>SMU_1632</b>       | <i>mtnN</i> | MTA/SAH nucleosidase                                                 | 0.024 | 0.000 | 0.001 | 0.004  |
| <b>SMU_1633<br/>c</b> | -           | conserved hypothetical protein                                       | 0.488 | 0.870 | 0.274 | 0.000  |
| <b>SMU_1634<br/>c</b> | -           | conserved hypothetical protein, MutT/nudix family                    | 0.167 | 0.253 | 0.388 | 0.004  |
| <b>SMU_1635</b>       | <i>glmU</i> | UDP-N-acetylglucosamine pyrophosphorylase                            | 0.017 | 0.029 | 0.012 | 0.002  |
| <b>SMU_1636<br/>c</b> | -           | conserved hypothetical protein                                       | 0.589 | 1.138 | 1.044 | 0.000  |
| <b>SMU_1637<br/>c</b> | -           | hypothetical protein                                                 | 0.444 | 0.415 | 0.466 | 0.001  |
| <b>SMU_1638<br/>c</b> | -           | hypothetical protein                                                 | 0.247 | 0.466 | 0.452 | 0.000  |
| <b>SMU_1639</b>       | <i>metS</i> | methionyl-tRNA synthetase                                            | 0.013 | 0.006 | 0.006 | 0.000  |
| <b>SMU_163c</b>       | -           | hypothetical protein                                                 | 1.213 | 1.344 | 1.043 | 0.001  |
| <b>SMU_164</b>        | <i>spoU</i> | tRNA/rRNA methyltransferase                                          | 1.980 | 1.508 | 0.954 | 0.002  |
| <b>SMU_1641<br/>c</b> | -           | conserved hypothetical protein                                       | 1.538 | 2.042 | 2.014 | 0.001  |
| <b>SMU_1642<br/>c</b> | -           | conserved hypothetical protein                                       | 0.974 | 1.115 | 0.940 | 0.000  |
| <b>SMU_1643<br/>c</b> | -           | conserved hypothetical protein                                       | 2.531 | 3.294 | 3.171 | 3.271  |
| <b>SMU_1644<br/>c</b> | -           | conserved hypothetical protein                                       | 3.862 | 5.662 | 4.181 | 1.821  |
| <b>SMU_1645</b>       | <i>tehB</i> | tellurite resistance protein                                         | 3.043 | 3.117 | 3.261 | 0.600  |
| <b>SMU_1646<br/>c</b> | -           | conserved hypothetical protein (possible hemolysis inducing protein) | 2.600 | 3.215 | 2.880 | 69.900 |

|                                        |             |                                                                      |       |       |       |       |
|----------------------------------------|-------------|----------------------------------------------------------------------|-------|-------|-------|-------|
| <b>SMU_1647</b><br>c                   | -           | transcriptional regulator                                            | 1.208 | 1.166 | 0.911 | 0.000 |
| <b>SMU_1648</b><br>c                   | -           | hypothetical protein                                                 | 1.787 | 1.970 | 2.173 | 0.002 |
| <b>SMU_1649</b>                        | <i>exoA</i> | exodeoxyribonuclease III/ Smx nuclease                               | 0.642 | 0.196 | 0.143 | 0.001 |
| <b>SMU_165</b>                         | -           | fatty acid-binding protein, DegV family                              | 0.224 | 0.008 | 0.358 | 0.001 |
| <b>SMU_1650</b>                        | <i>end3</i> | endonuclease III (DNA repair)                                        | 0.840 | 0.818 | 0.400 | 0.000 |
| <b>SMU_1651</b>                        | <i>arsC</i> | arsenate reductase                                                   | 1.671 | 0.972 | 0.565 | 0.091 |
| <b>SMU_1652</b>                        | <i>ogt</i>  | methylated-DNA--protein-cysteine S-methyltransferase                 | 0.687 | 0.718 | 0.428 | 0.000 |
| <b>SMU_1653</b>                        | <i>serA</i> | D-3-phosphoglycerate dehydrogenase                                   | 1.185 | 0.145 | 0.002 | 0.001 |
| <b>SMU_1654</b><br>c                   | -           | acetyltransferase                                                    | 1.004 | 0.724 | 0.560 | 0.001 |
| <b>SMU_1655</b><br>c                   | -           | hypothetical protein                                                 | 0.115 | 0.120 | 0.043 | 0.003 |
| <b>SMU_1656</b>                        | <i>serC</i> | phosphoserine aminotransferase                                       | 1.294 | 0.167 | 0.050 | 0.000 |
| <b>SMU_1657</b><br>c                   | <i>glnB</i> | nitrogen regulatory protein PII                                      | 0.976 | 1.022 | 2.273 | 0.000 |
| <b>SMU_1658</b>                        | <i>nrgA</i> | ammonium transporter, NrgA protein                                   | 2.275 | 2.424 | 2.362 | 0.001 |
| <b>SMU_1659</b><br>c                   | -           | conserved hypothetical protein, tetrapyrrole methylase family        | 1.581 | 0.735 | 0.863 | 0.001 |
| <b>SMU_166</b><br><b>SMU_1660</b><br>c | -           | hypothetical protein                                                 | 2.075 | 1.968 | 2.486 | 1.995 |
| <b>SMU_1661</b><br>c                   | <i>lspA</i> | signal peptidase II                                                  | 1.005 | 0.610 | 0.227 | 0.000 |
| <b>SMU_1662</b>                        | <i>holB</i> | DNA polymerase III delta prime subunit                               | 0.085 | 0.100 | 0.090 | 0.000 |
| <b>SMU_1663</b>                        | <i>kthY</i> | thymidylate kinase                                                   | 0.005 | 0.003 | 0.009 | 0.001 |
| <b>SMU_1664</b><br>c                   | <i>acoB</i> | acetoin utilization protein, acetoin dehydrogenase                   | 1.220 | 1.161 | 0.900 | 0.001 |
| <b>SMU_1665</b>                        | <i>livF</i> | branched chain amino acid ABC transporter, ATP-binding protein       | 0.388 | 0.540 | 0.059 | 0.002 |
| <b>SMU_1666</b>                        | <i>livG</i> | branched chain amino acid ABC transporter, ATP-binding protein       | 0.955 | 0.963 | 0.082 | 0.000 |
| <b>SMU_1667</b>                        | <i>livM</i> | branched chain amino acid ABC transporter, permease                  | 1.294 | 0.933 | 0.125 | 0.001 |
| <b>SMU_1668</b>                        | <i>livH</i> | branched chain amino acid ABC transporter, permease                  | 2.282 | 1.788 | 0.200 | 0.001 |
| <b>SMU_1669</b>                        | <i>livK</i> | branched-chain amino acid ABC transporter, substrate-binding protein | 2.363 | 2.072 | 0.192 | 0.941 |
| <b>SMU_167</b><br><b>SMU_1670</b><br>c | -           | hypothetical protein                                                 | 3.343 | 2.872 | 2.945 | 0.002 |
| <b>SMU_1671</b><br>c                   | -           | conserved hypothetical protein                                       | 5.108 | 4.038 | 7.062 | 0.002 |
| <b>SMU_1672</b>                        | <i>clpP</i> | ATP-dependent Clp protease, proteolytic subunit                      | 0.402 | 0.009 | 0.010 | 0.000 |
| <b>SMU_1673</b>                        | <i>upp</i>  | uracil phosphoribosyltransferase                                     | 2.221 | 1.660 | 1.485 | 0.000 |
| <b>SMU_1674</b>                        | <i>patB</i> | aminotransferase class II                                            | 1.893 | 5.381 | 0.883 | 0.001 |
| <b>SMU_1675</b>                        | <i>metB</i> | cystathionine gamma-synthase                                         | 1.974 | 1.365 | 0.663 | 0.000 |

|                      |              |                                                                                                      |       |        |       |       |
|----------------------|--------------|------------------------------------------------------------------------------------------------------|-------|--------|-------|-------|
| <b>SMU_1676</b><br>c | -            | polysaccharide transporter                                                                           | 0.126 | 0.096  | 0.049 | 0.002 |
| <b>SMU_1677</b>      | <i>murE</i>  | UDP-N-acetylmuramoylananine-D-glutamate-2,6-diaminopimelate ligase; UDP-MurNac-tripeptide synthetase | 0.070 | 0.005  | 0.002 | 0.001 |
| <b>SMU_1678</b>      | -            | conserved hypothetical protein                                                                       | 3.077 | 1.513  | 1.530 | 0.000 |
| <b>SMU_1679</b><br>c | -            | conserved hypothetical protein                                                                       | 2.353 | 0.764  | 0.889 | 0.000 |
| <b>SMU_168</b>       | -            | transcriptional regulator                                                                            | 0.668 | 0.410  | 0.113 | 0.000 |
| <b>SMU_1680</b><br>c | -            | hypothetical protein                                                                                 | 1.681 | 0.859  | 0.800 | 0.000 |
| <b>SMU_1681</b><br>c | -            | conserved hypothetical protein                                                                       | 0.622 | 0.454  | 0.538 | 1.004 |
| <b>SMU_1682</b><br>c | -            | conserved hypothetical protein (possible intracellular protease)                                     | 2.007 | 0.363  | 0.708 | 0.008 |
| <b>SMU_1683</b><br>c | -            | conserved hypothetical protein                                                                       | 1.460 | 1.056  | 1.084 | 0.005 |
| <b>SMU_1685</b><br>c | <i>orf11</i> | conserved hypothetical protein                                                                       | 2.053 | 0.718  | 0.664 | 0.001 |
| <b>SMU_1687</b>      | <i>ppaC</i>  | manganese-dependent inorganic pyrophosphatase (type II PPase)                                        | 0.001 | 0.005  | 0.007 | 0.000 |
| <b>SMU_1688</b>      | <i>dltD</i>  | integral membrane protein                                                                            | 3.290 | 4.951  | 0.059 | 0.000 |
| <b>SMU_1689</b>      | <i>dltC</i>  | D-alanyl carrier protein                                                                             | 4.522 | 19.069 | 0.002 | 0.001 |
| <b>SMU_169</b>       | -            | 50S ribosomal protein L13                                                                            | 0.001 | 0.000  | 0.000 | 0.000 |
| <b>SMU_1690</b>      | <i>dltB</i>  | integral membrane protein, D-alanyl transfer                                                         | 4.200 | 9.176  | 0.021 | 0.099 |
| <b>SMU_1691</b>      | <i>dltA</i>  | D-alanine-D-alanyl carrier protein ligase                                                            | 4.805 | 9.732  | 0.004 | 0.213 |
| <b>SMU_1692</b>      | <i>pflA</i>  | pyruvate-formate lyase activating enzyme                                                             | 2.012 | 1.748  | 1.924 | 0.000 |
| <b>SMU_1693</b>      | <i>hlyX</i>  | uncharacterized hemolysin                                                                            | 1.346 | 1.222  | 2.817 | 0.072 |
| <b>SMU_1694</b><br>c | -            | permease ( possible ABC transporter permease )                                                       | 2.557 | 2.885  | 2.983 | 0.003 |
| <b>SMU_1695</b>      | -            | ABC transporter, ATP-binding protein; possible molybdenum transport system                           | 1.779 | 1.436  | 1.113 | 0.000 |
| <b>SMU_1697</b><br>c | -            | possible rRNA methylase, SAM-dependent methyltransferase superfamily                                 | 1.731 | 2.050  | 1.888 | 0.001 |
| <b>SMU_1699</b><br>c | -            | conserved hypothetical protein, radical SAM superfamily                                              | 1.452 | 1.089  | 1.000 | 0.000 |
| <b>SMU_170</b>       | <i>rpsI</i>  | 30S ribosomal protein S9                                                                             | 0.014 | 0.001  | 0.000 | 0.004 |
| <b>SMU_1700</b><br>c | -            | LrgB-like protein; possible murein hydrolase regulator                                               | 1.885 | 1.668  | 1.594 | 0.002 |
| <b>SMU_1701</b><br>c | -            | conserved hypothetical protein                                                                       | 1.240 | 1.143  | 1.174 | 0.002 |
| <b>SMU_1702</b><br>c | -            | uncharacterized phosphatase; possible PAP2 family protein                                            | 2.736 | 3.626  | 2.223 | 0.002 |
| <b>SMU_1703</b><br>c | -            | conserved hypothetical protein                                                                       | 0.092 | 0.200  | 0.222 | 0.003 |
| <b>SMU_1704</b>      | -            | conserved hypothetical protein                                                                       | 3.632 | 4.446  | 3.644 | 0.025 |
| <b>SMU_1705</b>      | -            | conserved hypothetical protein                                                                       | 0.757 | 0.769  | 0.744 | 0.015 |
| <b>SMU_1706</b>      | -            | conserved hypothetical protein                                                                       | 2.068 | 2.855  | 2.914 | 0.188 |
| <b>SMU_1707</b><br>c | <i>trmH</i>  | spoU-related rRNA/tRNA methylase                                                                     | 2.492 | 3.620  | 3.241 | 0.001 |

|                             |              |                                                                            |       |       |       |       |
|-----------------------------|--------------|----------------------------------------------------------------------------|-------|-------|-------|-------|
| <b>SMU_1708</b>             | <i>trkA</i>  | potassium uptake system protein                                            | 0.448 | 0.026 | 0.008 | 0.010 |
| <b>SMU_1709</b>             | <i>trkH</i>  | potassium uptake protein TrkH                                              | 0.622 | 0.020 | 0.002 | 0.002 |
| <b>SMU_1710</b><br><b>c</b> | -            | conserved hypothetical protein                                             | 0.864 | 0.889 | 0.689 | 0.000 |
| <b>SMU_1711</b>             | <i>rluB</i>  | ribosomal large subunit pseudouridine synthase B                           | 1.007 | 0.242 | 0.240 | 0.000 |
| <b>SMU_1712</b><br><b>c</b> | <i>scpB</i>  | segregation and condensation protein B                                     | 1.100 | 0.161 | 0.057 | 0.000 |
| <b>SMU_1713</b><br><b>c</b> | <i>scpA</i>  | segregation and condensation protein A                                     | 1.642 | 0.290 | 0.081 | 0.001 |
| <b>SMU_1714</b><br><b>c</b> | <i>xerD</i>  | tyrosine recombinase                                                       | 0.812 | 0.338 | 0.376 | 0.001 |
| <b>SMU_1715</b><br><b>c</b> | -            | CBS domain protein                                                         | 1.047 | 1.203 | 1.105 | 0.000 |
| <b>SMU_1716</b><br><b>c</b> | -            | possible phosphoesterase                                                   | 0.678 | 0.467 | 0.403 | 0.001 |
| <b>SMU_1717</b><br><b>c</b> | <i>rdgB</i>  | HAM1-like protein                                                          | 0.389 | 0.297 | 0.328 | 0.000 |
| <b>SMU_1718</b>             | <i>murl</i>  | glutamate racemase                                                         | 0.015 | 0.069 | 0.071 | 0.000 |
| <b>SMU_1719</b><br><b>c</b> | -            | conserved hypothetical protein                                             | 1.701 | 1.173 | 1.313 | 0.023 |
| <b>SMU_172</b>              | -            | conserved hypothetical protein (possible cell growth regulatory protein)   | 1.603 | 1.258 | 0.781 | 0.000 |
| <b>SMU_1721</b><br><b>c</b> | <i>lysA</i>  | diaminopimelate decarboxylase                                              | 1.313 | 0.657 | 0.456 | 0.000 |
| <b>SMU_1722</b><br><b>c</b> | -            | conserved hypothetical protein, membrane protein                           | 2.033 | 1.685 | 2.309 | 0.147 |
| <b>SMU_1723</b><br><b>c</b> | -            | conserved hypothetical protein                                             | 3.430 | 2.588 | 2.788 | 0.000 |
| <b>SMU_1724</b><br><b>c</b> | <i>cspR</i>  | rRNA methyltransferase                                                     | 1.545 | 1.265 | 1.275 | 0.001 |
| <b>SMU_1725</b>             | -            | acylphosphatase                                                            | 2.055 | 1.690 | 1.827 | 0.011 |
| <b>SMU_1727</b>             | <i>yidC2</i> | OxaA-like protein; inner membrane protein                                  | 0.233 | 0.257 | 0.060 | 0.000 |
| <b>SMU_1728</b>             | <i>greA</i>  | transcription elongation factor GreA                                       | 0.114 | 0.003 | 0.002 | 0.001 |
| <b>SMU_1729</b><br><b>c</b> | <i>pabC</i>  | aminodeoxychorismate lyase-like protein (fragment)                         | 1.055 | 0.293 | 0.079 | 0.001 |
| <b>SMU_173</b>              | -            | conserved hypothetical protein (possible ppGpp-regulated growth inhibitor) | 2.131 | 2.398 | 2.773 | 0.005 |
| <b>SMU_1730</b><br><b>c</b> | -            | arylalkylamine n-acetyltransferase                                         | 0.530 | 0.753 | 1.398 | 0.000 |
| <b>SMU_1731</b>             | <i>murC</i>  | UDP-N-acetylmuramate--L-alanine ligase                                     | 0.022 | 0.094 | 0.072 | 0.000 |
| <b>SMU_1732</b><br><b>c</b> | -            | conserved hypothetical protein                                             | 1.352 | 0.898 | 1.531 | 0.001 |
| <b>SMU_1733</b><br><b>c</b> | <i>snf</i>   | SNF helicase                                                               | 1.655 | 1.348 | 0.996 | 0.181 |
| <b>SMU_1734</b>             | <i>accA</i>  | acetyl-CoA carboxylase alpha subunit                                       | 0.001 | 0.001 | 0.000 | 0.001 |
| <b>SMU_1735</b>             | <i>accD</i>  | acetyl-CoA carboxylase beta subunit                                        | 0.001 | 0.001 | 0.001 | 0.000 |
| <b>SMU_1736</b>             | <i>accC</i>  | acetyl-CoA carboxylase biotin carboxylase subunit                          | 0.002 | 0.001 | 0.001 | 0.001 |

|                  |             |                                                                                      |       |       |       |       |
|------------------|-------------|--------------------------------------------------------------------------------------|-------|-------|-------|-------|
| <b>SMU_1737</b>  | <i>fabZ</i> | (3R)-hydroxymyristoyl-(acyl carrier protein) dehydratase                             | 0.007 | 0.001 | 0.001 | 0.000 |
| <b>SMU_1738</b>  | <i>bccP</i> | biotin carboxyl carrier protein of acetyl-CoA carboxylase                            | 0.000 | 0.000 | 0.001 | 0.000 |
| <b>SMU_1739</b>  | <i>fabF</i> | 3-oxoacyl-(acyl-carrier-protein) synthase                                            | 0.029 | 0.000 | 0.000 | 0.002 |
| <b>SMU_1740</b>  | <i>fabG</i> | 3-oxoacyl-acyl-carrier-protein reductase / 3-ketoacyl-acyl carrier protein reductase | 0.007 | 0.001 | 0.001 | 0.002 |
| <b>SMU_1741</b>  | <i>fabD</i> | [acyl-carrier-protein] S-malonyltransferase                                          | 0.262 | 0.032 | 0.043 | 0.001 |
| <b>SMU_1742c</b> | -           | trans-2-enoyl-ACP reductase II                                                       | 0.002 | 0.000 | 0.000 | 0.000 |
| <b>SMU_1743</b>  | <i>acp</i>  | acyl carrier protein                                                                 | 0.007 | 0.015 | 0.051 | 0.000 |
| <b>SMU_1744</b>  | <i>fabH</i> | 3-oxoacyl-[acyl-carrier-protein] synthase III                                        | 0.082 | 0.001 | 0.001 | 0.001 |
| <b>SMU_1745c</b> | -           | transcriptional regulator, MarR family                                               | 0.547 | 0.162 | 0.058 | 0.000 |
| <b>SMU_1746c</b> | <i>fabM</i> | enoyl-CoA hydratase/trans-2, cis-3-decenoyl-ACP isomerase                            | 0.662 | 0.000 | 0.000 | 0.001 |
| <b>SMU_1747c</b> | -           | possible phosphatase                                                                 | 1.367 | 1.401 | 1.741 | 0.000 |
| <b>SMU_1748</b>  | <i>lysC</i> | aspartate kinase / homoserine dehydrogenase                                          | 0.002 | 0.001 | 0.000 | 0.001 |
| <b>SMU_174c</b>  | -           | conserved hypothetical protein                                                       | 4.976 | 6.061 | 6.021 | 0.541 |
| <b>SMU_1750c</b> | -           | hypothetical protein                                                                 | 0.670 | 0.829 | 0.980 | 0.000 |
| <b>SMU_1752c</b> | -           | hypothetical protein                                                                 | 1.004 | 0.898 | 0.882 | 0.027 |
| <b>SMU_1753c</b> | -           | conserved hypothetical protein                                                       | 0.312 | 0.311 | 0.360 | 0.003 |
| <b>SMU_1754c</b> | -           | conserved hypothetical protein                                                       | 3.976 | 4.088 | 3.421 | 0.000 |
| <b>SMU_1755c</b> | -           | conserved hypothetical protein                                                       | 0.465 | 0.619 | 0.585 | 0.001 |
| <b>SMU_1757c</b> | -           | conserved hypothetical protein                                                       | 2.284 | 2.270 | 2.328 | 0.002 |
| <b>SMU_1758c</b> | -           | conserved hypothetical protein                                                       | 2.127 | 2.001 | 1.970 | 0.000 |
| <b>SMU_176</b>   | -           | hypothetical protein                                                                 | 3.001 | 2.651 | 3.015 | 0.008 |
| <b>SMU_1760c</b> | -           | conserved hypothetical protein                                                       | 1.951 | 1.796 | 1.716 | 0.028 |
| <b>SMU_1761c</b> | -           | conserved hypothetical protein                                                       | 2.215 | 1.777 | 1.560 | 0.451 |
| <b>SMU_1762c</b> | -           | conserved hypothetical protein                                                       | 4.351 | 2.856 | 3.074 | 0.001 |
| <b>SMU_1763c</b> | -           | conserved hypothetical protein                                                       | 1.921 | 1.698 | 1.246 | 0.000 |
| <b>SMU_1764c</b> | -           | conserved hypothetical protein                                                       | 2.121 | 1.600 | 1.410 | 0.003 |
| <b>SMU_1765c</b> | -           | conserved hypothetical protein                                                       | 1.589 | 0.779 | 0.743 | 0.004 |
| <b>SMU_1766c</b> | -           | hypothetical protein                                                                 | 0.220 | 0.168 | 0.104 | 1.035 |
| <b>SMU_1767c</b> | -           | hypothetical protein                                                                 | 0.779 | 1.051 | 1.054 | 0.002 |
| <b>SMU_1768c</b> | -           | hypothetical protein                                                                 | 0.615 | 1.049 | 0.869 | 0.000 |



|                 |             |                                                                                       |       |       |       |       |
|-----------------|-------------|---------------------------------------------------------------------------------------|-------|-------|-------|-------|
| <b>SMU_177</b>  | -           | PTS cellobiose-specific IIC component)                                                | 2.649 | 3.531 | 4.303 | 3.263 |
| <b>SMU_1770</b> | <i>syv</i>  | valyl-tRNA synthetase                                                                 | 0.065 | 0.051 | 0.042 | 0.000 |
| <b>SMU_1771</b> | -           | hypothetical protein                                                                  | 1.980 | 1.716 | 3.076 | 0.003 |
| <b>SMU_1772</b> | -           | hypothetical protein                                                                  | 3.955 | 4.610 | 4.955 | 0.000 |
| <b>SMU_1773</b> | -           | conserved hypothetical protein                                                        | 2.191 | 1.710 | 2.429 | 0.001 |
| <b>SMU_1774</b> | -           | conserved hypothetical protein                                                        | 1.900 | 1.687 | 3.987 | 1.956 |
| <b>SMU_1775</b> | -           | hypothetical protein                                                                  | 3.333 | 3.394 | 4.631 | 0.001 |
| <b>SMU_1776</b> | -           | conserved hypothetical protein                                                        | 2.319 | 3.046 | 2.593 | 0.001 |
| <b>SMU_1777</b> | <i>nrdI</i> | ribonucleotide reductase protein, Nrd                                                 | 0.471 | 0.440 | 0.561 | 0.000 |
| <b>SMU_1779</b> | <i>trmA</i> | RNA methyltransferase, TrmA family                                                    | 1.086 | 0.667 | 0.981 | 0.004 |
| <b>SMU_178</b>  | -           | conserved hypothetical protein                                                        | 1.927 | 3.987 | 4.327 | 0.001 |
| <b>SMU_1780</b> | <i>recX</i> | RecA regulator RecX                                                                   | 1.221 | 1.365 | 1.126 | 0.000 |
| <b>SMU_1781</b> | -           | conserved hypothetical protein                                                        | 5.108 | 0.320 | 0.265 | 0.001 |
| <b>SMU_1782</b> | -           | conserved hypothetical protein                                                        | 0.987 | 1.068 | 1.374 | 0.000 |
| <b>SMU_1783</b> | <i>proS</i> | prolyl-tRNA synthetase                                                                | 0.001 | 0.001 | 0.000 | 0.001 |
| <b>SMU_1784</b> | <i>eep</i>  | conserved hypothetical protein, peptidase family M50                                  | 0.365 | 0.281 | 0.156 | 0.003 |
| <b>SMU_1785</b> | <i>cdsA</i> | phosphatidate cytidyltransferase (CDP-diglyceride synthase)                           | 0.002 | 0.002 | 0.002 | 0.002 |
| <b>SMU_1786</b> | <i>uppS</i> | undecaprenyl pyrophosphate synthetase                                                 | 0.019 | 0.007 | 0.011 | 0.001 |
| <b>SMU_1787</b> | -           | preprotein translocase, YajC subunit                                                  | 0.305 | 0.362 | 0.292 | 0.001 |
| <b>SMU_1788</b> | <i>bta</i>  | bacterocin transport accessory protein                                                | 1.143 | 0.834 | 0.506 | 0.000 |
| <b>SMU_1789</b> | -           | conserved hypothetical protein                                                        | 0.761 | 0.356 | 0.660 | 0.000 |
| <b>SMU_179</b>  | -           | conserved hypothetical protein (possible oxidoreductase)                              | 1.111 | 1.917 | 2.553 | 0.059 |
| <b>SMU_1790</b> | -           | transcriptional regulator, probable MerR family                                       | 1.717 | 1.119 | 1.557 | 0.002 |
| <b>SMU_1791</b> | -           | conserved hypothetical protein                                                        | 0.532 | 0.412 | 0.296 | 0.035 |
| <b>SMU_1792</b> | -           | hypothetical protein                                                                  | 5.789 | 3.131 | 1.921 | 0.000 |
| <b>SMU_1794</b> | -           | hypothetical protein                                                                  | 3.326 | 2.102 | 1.713 | 0.001 |
| <b>SMU_1795</b> | -           | conserved hypothetical protein; possible methyltransferase                            | 2.258 | 1.110 | 0.799 | 0.015 |
| <b>SMU_1797</b> | -           | conserved hypothetical protein                                                        | 1.337 | 2.096 | 1.441 | 0.000 |
| <b>SMU_1798</b> | -           | conserved hypothetical protein                                                        | 1.221 | 0.026 | 0.028 | 0.000 |
| <b>SMU_1799</b> | <i>nadD</i> | nicotinate mononucleotide adenyltransferase (nicotinate-nucleotide adenyltransferase) | 0.001 | 0.002 | 0.001 | 0.001 |
| <b>SMU_18</b>   | -           | hypothetical protein                                                                  | 0.000 | 0.000 | 0.000 | 0.002 |

|                  |             |                                                             |       |       |       |       |
|------------------|-------------|-------------------------------------------------------------|-------|-------|-------|-------|
| <b>SMU_180</b>   | -           | oxidoreductase, possible fumarate reductase                 | 1.459 | 1.920 | 2.070 | 0.003 |
| <b>SMU_1800c</b> | -           | conserved hypothetical protein                              | 0.517 | 0.264 | 0.139 | 0.001 |
| <b>SMU_1801c</b> | -           | conserved hypothetical protein, GTP-binding                 | 0.001 | 0.001 | 0.001 | 0.000 |
| <b>SMU_1802c</b> | -           | conserved hypothetical protein                              | 0.004 | 0.001 | 0.001 | 0.009 |
| <b>SMU_1803c</b> | -           | conserved hypothetical protein                              | 2.477 | 3.875 | 3.658 | 0.001 |
| <b>SMU_1804c</b> | -           | hypothetical protein                                        | 3.600 | 3.245 | 3.757 | 0.000 |
| <b>SMU_1805</b>  | -           | transcriptional regulator                                   | 0.536 | 0.703 | 0.887 | 0.000 |
| <b>SMU_1806</b>  | -           | macrolide-related glycosyltransferase                       | 2.333 | 2.309 | 2.430 | 0.004 |
| <b>SMU_1807c</b> | -           | permease                                                    | 2.734 | 3.061 | 2.957 | 0.793 |
| <b>SMU_1809</b>  | <i>scnG</i> | cdd2-related, bacteriocin related ABC element               | 3.417 | 4.302 | 4.277 | 8.773 |
| <b>SMU_181</b>   | <i>mvaK</i> | mevalonate kinase                                           | 0.186 | 0.284 | 0.000 | 0.005 |
| <b>SMU_1810</b>  | <i>scnE</i> | ABC transporter, membrane spanning permease                 | 5.798 | 6.679 | 6.561 | 0.001 |
| <b>SMU_1811</b>  | <i>scnF</i> | cdd4-like bacteriocin component, ScnF homolog               | 1.983 | 1.637 | 1.447 | 0.001 |
| <b>SMU_1812</b>  | <i>tpn</i>  | transposase, IS1193n-related                                | 2.091 | 1.855 | 2.063 | 0.000 |
| <b>SMU_1813</b>  | -           | hypothetical protein, probable transposase fragment         | 2.122 | 1.566 | 1.334 | 0.000 |
| <b>SMU_1814</b>  | <i>scnK</i> | histidine kinase, ScnK homolog                              | 2.914 | 2.615 | 2.500 | 0.001 |
| <b>SMU_1815</b>  | <i>scnR</i> | response regulator, ScnR homolog                            | 2.085 | 1.887 | 2.021 | 0.000 |
| <b>SMU_1816c</b> | -           | transposon-related, maturase-related protein fragment       | 2.094 | 1.097 | 1.104 | 0.000 |
| <b>SMU_1817c</b> | -           | transposon-related, maturase-related protein fragment       | 2.245 | 1.258 | 0.947 | 0.000 |
| <b>SMU_1818c</b> | -           | hypothetical protein                                        | 0.997 | 0.313 | 0.412 | 0.000 |
| <b>SMU_1819</b>  | <i>gatB</i> | glutamyl-tRNA (Gln) amidotransferase subunit B              | 0.008 | 0.001 | 0.000 | 0.001 |
| <b>SMU_182</b>   | <i>sloA</i> | ABC transporter, ATP-binding protein, iron and/or manganese | 1.350 | 1.595 | 0.705 | 0.104 |
| <b>SMU_1820c</b> | <i>gatA</i> | glutamyl-tRNA(Gln) amidotransferase subunit A               | 0.003 | 0.000 | 0.002 | 0.000 |
| <b>SMU_1821c</b> | <i>gatC</i> | glutamyl-tRNA (Gln) amidotransferase subunit C              | 0.000 | 0.000 | 0.001 | 0.001 |
| <b>SMU_1822</b>  | <i>gatA</i> | aspartyl-tRNA synthetase                                    | 0.126 | 0.024 | 0.000 | 0.001 |
| <b>SMU_1823</b>  | <i>pncA</i> | pyrazinamidase/nicotinamidase                               | 1.728 | 1.291 | 1.592 | 0.000 |
| <b>SMU_1824c</b> | -           | GTP-sensing transcriptional repressor                       | 2.100 | 0.134 | 0.335 | 0.000 |
| <b>SMU_1826</b>  | <i>yfbQ</i> | aminotransferase                                            | 1.126 | 1.346 | 0.266 | 0.004 |
| <b>SMU_1827</b>  | <i>bioB</i> | biotin biosynthesis protein                                 | 2.118 | 0.110 | 0.053 | 0.001 |
| <b>SMU_1828</b>  | <i>uspA</i> | universal stress protein family                             | 1.410 | 1.086 | 0.772 | 0.089 |
| <b>SMU_183</b>   | <i>sloB</i> | manganese ABC transporter permease element                  | 1.810 | 2.051 | 1.910 | 0.108 |
| <b>SMU_1830c</b> | -           | conserved hypothetical protein                              | 2.374 | 1.604 | 1.862 | 0.000 |

|                       |                   |                                                                         |       |       |       |        |
|-----------------------|-------------------|-------------------------------------------------------------------------|-------|-------|-------|--------|
| <b>SMU_1831</b>       | <i>aspG</i>       | L-asparaginase                                                          | 2.038 | 1.862 | 2.545 | 0.000  |
| <b>SMU_1832</b>       | -                 | hypothetical protein                                                    | 2.024 | 2.167 | 2.762 | 0.002  |
| <b>SMU_1833</b>       | <i>recG</i>       | ATP-dependent DNA helicase                                              | 1.129 | 0.255 | 0.226 | 0.001  |
| <b>SMU_1834</b>       | <i>alr</i>        | alanine racemase                                                        | 0.001 | 0.001 | 0.000 | 0.001  |
| <b>SMU_1835</b>       | <i>acpS</i>       | acyl carrier protein synthase                                           | 0.253 | 0.155 | 0.202 | 0.001  |
| <b>SMU_1836</b>       | <i>aroG</i>       | phospho-2-dehydro-3-deoxyheptonate aldolase (DAHP synthase)             | 0.000 | 0.000 | 0.000 | 0.001  |
| <b>SMU_1837</b>       | <i>aroH</i>       | 3-deoxy-7-phosphoheptulonate synthase                                   | 0.000 | 0.000 | 0.000 | 0.000  |
| <b>SMU_1838</b>       | <i>secA</i>       | preprotein translocase subunit SecA                                     | 0.011 | 0.009 | 0.008 | 0.001  |
| <b>SMU_1839</b>       | <i>manA</i>       | mannose-6-phosphate isomerase                                           | 0.919 | 0.266 | 1.253 | 0.000  |
| <b>SMU_184</b>        | <i>sloC</i>       | ABC transporter element, iron predicted binding protein                 | 2.776 | 3.411 | 3.676 | 0.323  |
| <b>SMU_1840</b>       | <i>scrK</i>       | fructokinase                                                            | 1.580 | 1.224 | 1.475 | 0.000  |
| <b>SMU_1841</b>       | <i>scrA</i>       | PTS system, sucrose-specific IIABC component                            | 1.960 | 2.164 | 2.391 | 0.002  |
| <b>SMU_1843</b>       | <i>scrB</i>       | sucrose-6-phosphate hydrolase                                           | 1.423 | 0.052 | 1.669 | 0.002  |
| <b>SMU_1844</b>       | <i>scrR</i>       | sucrose operon repressor                                                | 1.572 | 1.007 | 2.179 | 0.001  |
| <b>SMU_1845</b>       | <i>nusB</i>       | transcription antitermination factor                                    | 0.088 | 0.000 | 0.001 | 0.004  |
| <b>SMU_1846<br/>c</b> | -                 | conserved hypothetical protein                                          | 0.144 | 0.011 | 0.000 | 0.001  |
| <b>SMU_1847</b>       | <i>efp</i>        | translation elongation factor P                                         | 0.777 | 0.073 | 0.050 | 0.000  |
| <b>SMU_1848</b>       | -                 | hypothetical protein (similar to eukaryotic potassium channel proteins) | 4.380 | 4.824 | 5.534 | 0.001  |
| <b>SMU_1849</b>       | <i>comE<br/>B</i> | deoxycytidylate deaminase; late competence protein                      | 3.292 | 2.091 | 2.574 | 0.000  |
| <b>SMU_185</b>        | -                 | hypothetical protein                                                    | 3.592 | 4.451 | 4.998 | 0.001  |
| <b>SMU_1850</b>       | <i>pepP</i>       | aminopeptidase P (XAA-Pro aminopeptidase)                               | 2.553 | 1.747 | 1.747 | 0.001  |
| <b>SMU_1851</b>       | <i>uvrA</i>       | excinuclease ABC subunit A                                              | 1.556 | 0.898 | 0.862 | 0.009  |
| <b>SMU_1852</b>       | -                 | cation transporter, CorA family                                         | 0.000 | 0.001 | 0.000 | 0.002  |
| <b>SMU_1853</b>       | -                 | conserved hypothetical protein                                          | 0.544 | 0.380 | 0.207 | 0.001  |
| <b>SMU_1854</b>       | <i>hdrR</i>       | high density responsive regulator, HdrR                                 | 1.176 | 1.414 | 1.598 | 0.441  |
| <b>SMU_1855</b>       | <i>hdrM</i>       | high density responsive membrane protein, HdrM                          | 0.562 | 0.162 | 0.168 | 0.000  |
| <b>SMU_1856<br/>c</b> | -                 | conserved hypothetical protein                                          | 2.877 | 3.391 | 3.395 | 0.006  |
| <b>SMU_1858</b>       | <i>rpsR</i>       | 30S ribosomal protein S18                                               | 0.035 | 0.000 | 0.000 | 0.000  |
| <b>SMU_1859</b>       | <i>ssb</i>        | single-stranded DNA-binding protein                                     | 0.000 | 0.000 | 0.000 | 0.000  |
| <b>SMU_186</b>        | <i>sloR</i>       | metal-dependent transcriptional regulator (probable DtxR homolog)       | 1.197 | 0.589 | 0.039 | 0.000  |
| <b>SMU_1860</b>       | <i>rpsF</i>       | 30S ribosomal protein S6                                                | 0.000 | 0.000 | 0.000 | 0.000  |
| <b>SMU_1861<br/>c</b> | -                 | hypothetical protein                                                    | 2.723 | 2.951 | 2.625 | 0.000  |
| <b>SMU_1862</b>       | -                 | hypothetical protein                                                    | 3.799 | 4.455 | 3.132 | 40.223 |
| <b>SMU_1865</b>       | <i>mutY</i>       | A/G-specific adenine glycosylase                                        | 2.611 | 2.742 | 1.876 | 0.057  |

|                      |              |                                                               |       |        |        |       |
|----------------------|--------------|---------------------------------------------------------------|-------|--------|--------|-------|
| <b>SMU_1867</b><br>c | <i>adhB</i>  | alcohol dehydrogenase                                         | 2.018 | 1.493  | 0.721  | 0.000 |
| <b>SMU_1869</b>      | <i>trxA</i>  | thioredoxin                                                   | 2.212 | 0.410  | 0.372  | 0.000 |
| <b>SMU_1870</b>      | <i>mutS2</i> | DNA mismatch repair protein                                   | 1.613 | 0.798  | 0.509  | 0.001 |
| <b>SMU_1871</b><br>c | -            | conserved hypothetical protein                                | 1.715 | 0.066  | 0.171  | 0.004 |
| <b>SMU_1872</b><br>c | -            | Streptococcus-specific protein                                | 3.882 | 0.361  | 0.089  | 0.000 |
| <b>SMU_1873</b>      | <i>mh3</i>   | ribonuclease HIII                                             | 0.340 | 0.207  | 0.015  | 0.001 |
| <b>SMU_1874</b>      | <i>lepC</i>  | signal peptidase I                                            | 0.083 | 0.113  | 0.017  | 0.001 |
| <b>SMU_1875</b>      | <i>recD</i>  | exodeoxyribonuclease V alpha subunit                          | 1.187 | 0.562  | 0.396  | 0.002 |
| <b>SMU_1876</b>      | -            | conserved hypothetical protein                                | 3.081 | 2.346  | 4.563  | 0.003 |
| <b>SMU_1877</b>      | <i>manL</i>  | mannose PTS system component IIAB                             | 1.011 | 0.332  | 0.002  | 0.001 |
| <b>SMU_1878</b>      | <i>manM</i>  | mannose PTS system component IIC                              | 1.557 | 0.578  | 0.000  | 0.003 |
| <b>SMU_1879</b>      | <i>manN</i>  | mannose PTS system component IID                              | 3.347 | 1.347  | 0.002  | 0.066 |
| <b>SMU_187c</b>      | <i>dusA</i>  | probable tRNA-dihydrouridine synthase                         | 0.818 | 0.748  | 1.025  | 0.000 |
| <b>SMU_1881</b><br>c | <i>comA</i>  | competence factor transporting ATP-binding / permease protein | 2.363 | 2.759  | 3.292  | 0.045 |
| <b>SMU_1882</b><br>c | -            | hypothetical protein                                          | 7.330 | 9.209  | 11.166 | 0.001 |
| <b>SMU_1883</b>      | -            | conserved hypothetical protein                                | 1.475 | 0.549  | 0.074  | 0.000 |
| <b>SMU_1884</b><br>c | -            | conserved hypothetical protein                                | 2.420 | 3.653  | 3.510  | 0.279 |
| <b>SMU_1886</b>      | <i>sys</i>   | seryl-tRNA synthetase                                         | 0.000 | 0.000  | 0.000  | 0.001 |
| <b>SMU_1888</b>      | -            | transposase fragment                                          | 0.838 | 1.351  | 1.906  | 1.192 |
| <b>SMU_1889</b><br>c | -            | hypothetical protein (possible relation to bacteriocin BlpU)  | 2.768 | 2.215  | 3.388  | 2.195 |
| <b>SMU_188c</b>      | <i>hslO</i>  | Hsp33-like chaperonin                                         | 0.490 | 0.454  | 0.501  | 0.000 |
| <b>SMU_189</b>       | -            | hypothetical protein                                          | 0.560 | 0.873  | 0.856  | 0.000 |
| <b>SMU_1891</b><br>c | -            | hypothetical protein                                          | 1.772 | 2.065  | 4.515  | 0.008 |
| <b>SMU_1892</b><br>c | -            | hypothetical protein                                          | 1.933 | 2.808  | 2.640  | 0.000 |
| <b>SMU_1895</b><br>c | -            | hypothetical protein                                          | 6.135 | 4.711  | 3.982  | 0.001 |
| <b>SMU_1896</b><br>c | -            | hypothetical protein                                          | 2.238 | 2.394  | 3.028  | 0.000 |
| <b>SMU_1897</b>      | -            | ABC transporter, ATP-binding protein; similar to BlpA         | 2.298 | 2.093  | 2.320  | 0.000 |
| <b>SMU_1898</b>      | -            | ABC transporter, ATP-binding and permease element             | 1.406 | 1.483  | 1.465  | 0.520 |
| <b>SMU_1900</b>      | <i>comB</i>  | ABC transporter                                               | 0.668 | 0.758  | 0.940  | 0.012 |
| <b>SMU_1902</b><br>c | -            | hypothetical protein                                          | 0.833 | 1.200  | 1.697  | 0.001 |
| <b>SMU_1903</b><br>c | -            | hypothetical protein                                          | 6.828 | 10.036 | 11.250 | 0.004 |
| <b>SMU_1904</b><br>c | -            | hypothetical protein                                          | 1.835 | 2.573  | 2.833  | 0.004 |
| <b>SMU_1905</b><br>c | -            | hypothetical protein                                          | 0.866 | 1.097  | 2.064  | 0.000 |
| <b>SMU_1906</b><br>c | -            | bacteriocin-related protein                                   | 1.302 | 1.084  | 1.264  | 0.000 |

|                 |              |                                                                     |       |       |       |       |
|-----------------|--------------|---------------------------------------------------------------------|-------|-------|-------|-------|
| <b>SMU_1907</b> | -            | hypothetical protein                                                | 0.426 | 0.394 | 0.732 | 0.000 |
| <b>SMU_1908</b> | -            | hypothetical protein                                                | 5.630 | 6.844 | 8.017 | 0.001 |
| <b>SMU_1909</b> | -            | hypothetical protein                                                | 4.421 | 5.183 | 9.977 | 0.001 |
| <b>SMU_1910</b> | -            | hypothetical protein                                                | 2.358 | 3.302 | 4.730 | 0.391 |
| <b>SMU_1912</b> | -            | hypothetical protein                                                | 0.563 | 1.335 | 1.224 | 0.001 |
| <b>SMU_1913</b> | -            | hypothetical protein; immunity protein, BLpL-like                   | 0.718 | 1.097 | 1.975 | 0.001 |
| <b>SMU_1914</b> | <i>cipB</i>  | bacteriocin protein, BlpO-like                                      | 7.591 | 6.511 | 5.328 | 0.000 |
| <b>SMU_1915</b> | <i>comC</i>  | <i>S. mutans</i> specific competence stimulating peptide, precursor | 1.463 | 3.331 | 1.904 | 0.000 |
| <b>SMU_1916</b> | <i>comD</i>  | histidine kinase                                                    | 2.763 | 1.779 | 1.802 | 0.000 |
| <b>SMU_1917</b> | <i>comE</i>  | response regulator                                                  | 1.157 | 0.465 | 0.579 | 0.000 |
| <b>SMU_1918</b> | <i>dedA</i>  | membrane-associated protein DedA                                    | 0.616 | 0.405 | 0.116 | 0.001 |
| <b>SMU_1919</b> | <i>sapR2</i> | sakacin A production response regulator                             | 0.858 | 1.153 | 5.529 | 0.001 |
| <b>SMU_191c</b> | -            | phage-related integrase                                             | 3.996 | 4.677 | 4.557 | 0.001 |
| <b>SMU_1920</b> | <i>pgdA</i>  | phosphoglycerate dehydrogenase                                      | 0.007 | 0.012 | 0.014 | 0.004 |
| <b>SMU_1921</b> | <i>dnal</i>  | DNA replication protein; primosome component                        | 0.004 | 0.000 | 0.000 | 0.000 |
| <b>SMU_1922</b> | <i>dnaB</i>  | chromosome replication initiation and membrane attachment protein   | 0.000 | 0.001 | 0.001 | 0.000 |
| <b>SMU_1923</b> | -            | conserved hypothetical protein                                      | 0.309 | 0.106 | 0.072 | 0.001 |
| <b>SMU_1924</b> | <i>gcrR</i>  | response regulator for glucan-binding protein                       | 0.397 | 0.132 | 0.705 | 0.001 |
| <b>SMU_1925</b> | -            | conserved hypothetical protein                                      | 2.075 | 0.640 | 0.760 | 0.003 |
| <b>SMU_1926</b> | <i>psaR</i>  | transcriptional regulator PsaR                                      | 1.253 | 1.173 | 1.422 | 0.000 |
| <b>SMU_1927</b> | <i>psaA</i>  | PsaA protein/ ABC transporter, ATP-binding protein                  | 1.561 | 1.886 | 1.624 | 0.000 |
| <b>SMU_1928</b> | <i>psaB</i>  | protein secretion ABC transport permease                            | 1.468 | 1.808 | 1.912 | 0.011 |
| <b>SMU_1929</b> | <i>htpX</i>  | protease HtpX-like protein; heat shock protein                      | 1.245 | 1.635 | 1.554 | 0.001 |
| <b>SMU_1930</b> | <i>lemA</i>  | LemA-like protein                                                   | 1.268 | 1.609 | 2.012 | 0.000 |
| <b>SMU_1931</b> | <i>gidB</i>  | glucose-inhibited division protein                                  | 1.035 | 0.803 | 1.273 | 0.000 |
| <b>SMU_1933</b> | <i>sdcBB</i> | cobalt ABC transporter permease                                     | 1.772 | 2.935 | 3.191 | 0.012 |
| <b>SMU_1934</b> | <i>sdcBA</i> | cation ABC transport ATP-binding protein                            | 1.527 | 2.289 | 1.878 | 3.201 |
| <b>SMU_1935</b> | -            | conserved hypothetical protein                                      | 2.718 | 2.300 | 2.024 | 0.003 |
| <b>SMU_1936</b> | -            | conserved hypothetical protein                                      | 1.554 | 2.492 | 1.505 | 0.020 |
| <b>SMU_1937</b> | <i>cnhA</i>  | hydrolase, carbon-nitrogen family                                   | 0.827 | 0.688 | 0.788 | 0.000 |
| <b>SMU_1938</b> | <i>atmE</i>  | amino acid ABC transport permease                                   | 0.753 | 0.791 | 0.436 | 0.001 |

|                             |              |                                                            |       |       |       |       |
|-----------------------------|--------------|------------------------------------------------------------|-------|-------|-------|-------|
| <b>SMU_1939</b><br><b>c</b> | <i>atmD</i>  | amino acid ABC transport ATP-binding protein               | 0.782 | 0.703 | 0.242 | 0.000 |
| <b>SMU_193c</b>             | -            | conserved hypothetical protein                             | 0.529 | 1.302 | 1.187 | 0.000 |
| <b>SMU_1940</b><br><b>c</b> | <i>atmC</i>  | peptidase, possible succinyl-diaminopimelic descuccinylase | 1.495 | 0.907 | 1.137 | 0.001 |
| <b>SMU_1941</b>             | <i>atmB</i>  | ABC transporter solute-binding protein                     | 1.530 | 0.203 | 0.579 | 0.000 |
| <b>SMU_1942</b><br><b>c</b> | <i>atmA</i>  | amino acid ABC transporter substrate-binding protein       | 1.016 | 0.439 | 1.089 | 0.001 |
| <b>SMU_1943</b>             | <i>leuRS</i> | leucyl-tRNA synthetase                                     | 0.004 | 0.001 | 0.000 | 0.000 |
| <b>SMU_1945</b>             | -            | conserved hypothetical protein                             | 1.739 | 1.404 | 1.220 | 0.001 |
| <b>SMU_1946</b>             | -            | conserved hypothetical protein                             | 3.691 | 4.134 | 4.006 | 3.793 |
| <b>SMU_1947</b>             | <i>nusG</i>  | transcription antitermination factor                       | 0.240 | 0.010 | 0.021 | 0.001 |
| <b>SMU_1948</b>             | <i>secE</i>  | preprotein translocase, SecE subunit                       | 0.000 | 0.001 | 0.001 | 0.001 |
| <b>SMU_1949</b>             | <i>pbp2a</i> | penicillin-binding protein 2a                              | 1.009 | 0.535 | 0.149 | 0.000 |
| <b>SMU_194c</b>             | -            | conserved hypothetical protein, phage-related              | 1.338 | 0.843 | 1.393 | 0.001 |
| <b>SMU_1950</b>             | <i>rluD</i>  | ribosomal large subunit pseudouridine synthase D           | 1.993 | 1.703 | 1.591 | 0.001 |
| <b>SMU_1951</b><br><b>c</b> | -            | conserved hypothetical protein                             | 2.242 | 1.924 | 2.229 | 0.288 |
| <b>SMU_1954</b>             | <i>groEL</i> | chaperonin GroEL                                           | 0.000 | 0.001 | 0.001 | 0.001 |
| <b>SMU_1955</b>             | <i>groES</i> | co-chaperonin 10kDa                                        | 0.114 | 0.032 | 0.042 | 0.002 |
| <b>SMU_1956</b><br><b>c</b> | -            | conserved hypothetical protein                             | 1.508 | 1.998 | 2.029 | 0.001 |
| <b>SMU_1957</b>             | <i>levG</i>  | fructose-specific Enzyme IID component                     | 1.010 | 0.894 | 0.949 | 0.000 |
| <b>SMU_1958</b><br><b>c</b> | <i>levF</i>  | fructose-specific Enzyme IIC component                     | 2.176 | 2.174 | 1.775 | 0.001 |
| <b>SMU_195c</b>             | -            | hypothetical protein                                       | 1.980 | 3.183 | 1.909 | 0.000 |
| <b>SMU_1960</b><br><b>c</b> | <i>levE</i>  | fructose-specific Enzyme IIB component                     | 0.639 | 0.717 | 0.539 | 0.001 |
| <b>SMU_1961</b><br><b>c</b> | <i>levD</i>  | fructose-specific Enzyme IIA component                     | 1.164 | 0.845 | 0.568 | 0.001 |
| <b>SMU_1963</b><br><b>c</b> | <i>levQ</i>  | sugar-binding periplasmic protein                          | 1.655 | 3.080 | 2.649 | 0.001 |
| <b>SMU_1964</b><br><b>c</b> | <i>levR</i>  | two-component response regulator                           | 0.944 | 1.900 | 1.408 | 1.515 |
| <b>SMU_1965</b><br><b>c</b> | <i>levS</i>  | histidine kinase                                           | 1.518 | 1.780 | 1.551 | 0.001 |
| <b>SMU_1966</b><br><b>c</b> | <i>rbsB</i>  | ABC transport ribose-binding protein, periplasmic          | 1.452 | 1.756 | 1.668 | 0.059 |
| <b>SMU_1967</b>             | <i>ssbA</i>  | single-stranded DNA-binding protein                        | 0.717 | 1.028 | 0.999 | 0.000 |
| <b>SMU_1968</b><br><b>c</b> | -            | conserved hypothetical protein                             | 1.023 | 1.556 | 1.344 | 0.000 |
| <b>SMU_1969</b><br><b>c</b> | -            | probable transcriptional regulator                         | 1.259 | 1.417 | 1.287 | 0.001 |
| <b>SMU_196c</b>             | -            | immunogenic secreted protein (transfer protein)            | 1.544 | 1.415 | 1.631 | 0.072 |
| <b>SMU_1970</b><br><b>c</b> | <i>pheT</i>  | phenylalanyl-tRNA synthetase beta subunit                  | 1.039 | 1.421 | 0.803 | 0.001 |

|                             |                         |                                                                                      |       |       |        |        |
|-----------------------------|-------------------------|--------------------------------------------------------------------------------------|-------|-------|--------|--------|
| <b>SMU_1971</b><br><b>c</b> | <i>trxH</i>             | thioredoxin family protein                                                           | 0.383 | 0.348 | 0.337  | 0.001  |
| <b>SMU_1972</b><br><b>c</b> | -                       | conserved hypothetical protein                                                       | 0.918 | 0.855 | 0.713  | 0.001  |
| <b>SMU_1973</b>             | <i>pepA</i>             | glutamyl aminopeptidase                                                              | 1.206 | 0.436 | 1.298  | 0.001  |
| <b>SMU_1974</b>             | <i>proC</i>             | pyrroline-5-carboxylate reductase                                                    | 1.168 | 0.005 | 1.231  | 0.000  |
| <b>SMU_1975</b><br><b>c</b> | -                       | conserved hypothetical protein                                                       | 0.661 | 0.556 | 0.455  | 0.003  |
| <b>SMU_1976</b><br><b>c</b> | -                       | conserved hypothetical protein                                                       | 0.926 | 1.431 | 1.295  | 0.002  |
| <b>SMU_1977</b><br><b>c</b> | -                       | transcriptional regulator                                                            | 0.267 | 0.177 | 0.100  | 0.000  |
| <b>SMU_1978</b>             | <i>ackA</i>             | acetate kinase                                                                       | 0.044 | 0.015 | 0.008  | 0.001  |
| <b>SMU_1979</b><br><b>c</b> | <i>ythI</i>             | conserved hypothetical protein, methyltransferase domain                             | 0.349 | 0.273 | 0.214  | 0.001  |
| <b>SMU_197c</b>             | -                       | hypothetical protein                                                                 | 1.881 | 2.226 | 3.729  | 0.128  |
| <b>SMU_1980</b><br><b>c</b> | -                       | conserved hypothetical protein                                                       | 0.598 | 0.706 | 0.559  | 0.000  |
| <b>SMU_1981</b><br><b>c</b> | <i>comG</i>             | competence protein G                                                                 | 0.356 | 0.613 | 0.386  | 0.002  |
| <b>SMU_1982</b><br><b>c</b> | -                       | conserved hypothetical protein                                                       | 0.294 | 0.296 | 0.275  | 0.000  |
| <b>SMU_1983</b>             | <i>comY<sub>D</sub></i> | competence protein ComYD                                                             | 1.092 | 1.332 | 1.185  | 0.001  |
| <b>SMU_1984</b>             | <i>comY<sub>C</sub></i> | competence protein ComYC                                                             | 0.477 | 0.595 | 0.467  | 0.002  |
| <b>SMU_1985</b>             | <i>comY<sub>B</sub></i> | competence protein; general (type II) secretory pathway protein                      | 0.299 | 0.255 | 0.238  | 0.037  |
| <b>SMU_1987</b>             | <i>comY<sub>A</sub></i> | late competence protein; type II secretion system protein E                          | 0.589 | 0.356 | 0.367  | 0.001  |
| <b>SMU_1988</b><br><b>c</b> | -                       | probable DNA binding protein                                                         | 0.388 | 0.565 | 0.081  | 0.001  |
| <b>SMU_1989</b>             | <i>rpoC</i>             | DNA-directed RNA polymerase, beta' subunit                                           | 0.028 | 0.015 | 0.026  | 0.005  |
| <b>SMU_198c</b>             | <i>tpn</i>              | conjugative transposon protein                                                       | 3.995 | 5.740 | 8.983  | 0.006  |
| <b>SMU_1990</b>             | <i>rpoB</i>             | DNA-directed RNA polymerase, beta subunit                                            | 0.035 | 0.011 | 0.023  | 0.003  |
| <b>SMU_1991</b>             | <i>pbp1b</i>            | penicillin-binding protein 1b                                                        | 1.868 | 0.061 | 0.228  | 0.005  |
| <b>SMU_1992</b>             | <i>tyrS</i>             | tyrosyl-tRNA synthetase                                                              | 0.079 | 0.026 | 0.033  | 0.000  |
| <b>SMU_1993</b>             | <i>adcB</i>             | zinc ABC transporter, permease                                                       | 0.489 | 0.061 | 0.002  | 0.003  |
| <b>SMU_1994</b>             | <i>adcC</i>             | zinc ABC transport, ATP-binding protein                                              | 0.341 | 0.063 | 0.003  | 0.000  |
| <b>SMU_1995</b><br><b>c</b> | <i>zitR</i>             | zinc transport transcriptional repressor                                             | 0.270 | 0.102 | 0.021  | 0.000  |
| <b>SMU_1996</b>             | <i>ipk</i>              | isopentenyl monophosphate kinase (4-diphosphocytidyl-2-C-methyl-D-erythritol kinase) | 2.804 | 2.752 | 2.752  | 0.472  |
| <b>SMU_1997</b>             | <i>comX1</i>            | competence-specific sigma factor                                                     | 1.521 | 1.584 | 1.963  | 45.863 |
| <b>SMU_1999</b><br><b>c</b> | -                       | glutamate--cysteine ligase                                                           | 0.730 | 0.854 | 0.384  | 0.003  |
| <b>SMU_199c</b>             | -                       | hypothetical protein                                                                 | 5.406 | 6.616 | 11.323 | 0.003  |
| <b>SMU_20</b>               | <i>mreC</i>             | cell shape-determining protein MreC                                                  | 1.145 | 8.024 | 12.768 | 0.003  |
| <b>SMU_2000</b>             | <i>rl17</i>             | 50S ribosomal protein L17                                                            | 0.002 | 0.001 | 0.001  | 0.001  |

|                  |               |                                                                                            |       |       |       |       |
|------------------|---------------|--------------------------------------------------------------------------------------------|-------|-------|-------|-------|
| <b>SMU_2001</b>  | <i>rpoA</i>   | DNA-directed RNA polymerase, alpha subunit                                                 | 0.000 | 0.001 | 0.000 | 0.000 |
| <b>SMU_2002</b>  | <i>rs11</i>   | 30S ribosomal protein S11                                                                  | 0.046 | 0.022 | 0.041 | 0.001 |
| <b>SMU_2003</b>  | <i>rs13</i>   | 50S ribosomal protein L36                                                                  | 0.044 | 0.002 | 0.000 | 0.000 |
| <b>SMU_2004</b>  | <i>if1</i>    | translation initiation factor IF-1                                                         | 0.001 | 0.000 | 0.000 | 0.000 |
| <b>SMU_2005</b>  | <i>adk</i>    | adenylate kinase (ATP-AMP transphosphorylase) (superoxide-inducible protein 16)            | 0.001 | 0.001 | 0.000 | 0.000 |
| <b>SMU_2006</b>  | <i>secY</i>   | preprotein translocase                                                                     | 0.005 | 0.007 | 0.016 | 0.008 |
| <b>SMU_2007</b>  | <i>r15</i>    | 50S ribosomal protein L15, N-terminal fragment                                             | 0.004 | 0.000 | 0.000 | 0.000 |
| <b>SMU_2008</b>  | <i>r130</i>   | 50S ribosomal protein L30                                                                  | 0.001 | 0.000 | 0.000 | 0.046 |
| <b>SMU_2009</b>  | <i>rs5</i>    | 30S ribosomal protein S5                                                                   | 0.017 | 0.000 | 0.000 | 0.000 |
| <b>SMU_200c</b>  | -             | hypothetical protein                                                                       | 2.259 | 2.852 | 3.716 | 0.001 |
| <b>SMU_2010</b>  | <i>r18</i>    | 50S ribosomal protein L18                                                                  | 0.001 | 0.000 | 0.000 | 0.000 |
| <b>SMU_2011</b>  | <i>r16</i>    | 50S ribosomal protein L6 (BL10)                                                            | 0.012 | 0.003 | 0.008 | 0.000 |
| <b>SMU_2012</b>  | <i>rs8</i>    | 30S ribosomal protein S8                                                                   | 0.000 | 0.001 | 0.000 | 0.000 |
| <b>SMU_2014</b>  | <i>rs14</i>   | 30S ribosomal protein S14                                                                  | 0.000 | 0.000 | 0.000 | 0.000 |
| <b>SMU_2015</b>  | <i>r15</i>    | 50S ribosomal protein L5                                                                   | 0.000 | 0.000 | 0.000 | 0.002 |
| <b>SMU_2016</b>  | <i>r124</i>   | 50S ribosomal protein L24                                                                  | 0.000 | 0.001 | 0.000 | 0.000 |
| <b>SMU_2017</b>  | <i>r14</i>    | 50S ribosomal protein L14                                                                  | 0.001 | 0.000 | 0.000 | 0.000 |
| <b>SMU_2018</b>  | <i>rs17</i>   | 30S ribosomal protein S17                                                                  | 0.000 | 0.000 | 0.000 | 0.000 |
| <b>SMU_2019</b>  | <i>r129</i>   | 50s ribosomal protein L29                                                                  | 0.001 | 0.000 | 0.000 | 0.000 |
| <b>SMU_201c</b>  | -             | conserved hypothetical protein                                                             | 2.414 | 2.264 | 3.024 | 0.001 |
| <b>SMU_2020</b>  | <i>r16</i>    | 50S ribosomal protein L16                                                                  | 0.000 | 0.000 | 0.000 | 0.000 |
| <b>SMU_2021</b>  | <i>rs3</i>    | 30S ribosomal protein S3                                                                   | 0.001 | 0.000 | 0.000 | 0.003 |
| <b>SMU_2022</b>  | <i>r122</i>   | 50S ribosomal protein L22                                                                  | 0.001 | 0.000 | 0.001 | 0.000 |
| <b>SMU_2023c</b> | <i>rps19</i>  | 30S ribosomal protein S19, C-terminal fragment                                             | 0.000 | 0.001 | 0.000 | 0.000 |
| <b>SMU_2024c</b> | <i>r14</i>    | 50S ribosomal protein L4, N-terminal fragment                                              | 0.001 | 0.001 | 0.000 | 0.000 |
| <b>SMU_2025</b>  | <i>r13</i>    | 50S ribosomal protein L3                                                                   | 0.000 | 0.000 | 0.000 | 0.000 |
| <b>SMU_2026c</b> | <i>rps1NA</i> | 30S ribosomal protein S10 fragment                                                         | 0.126 | 0.006 | 0.010 | 0.003 |
| <b>SMU_2027</b>  | -             | transcriptional regulator/repressor                                                        | 1.874 | 2.934 | 2.907 | 0.001 |
| <b>SMU_2028</b>  | <i>sacB</i>   | fructosyltransferase                                                                       | 2.086 | 3.044 | 3.155 | 0.023 |
| <b>SMU_2029</b>  | <i>clpC</i>   | ATP-dependent Clp protease, ATP-binding subunit (Class III stress response-related ATPase) | 1.352 | 1.600 | 1.122 | 0.006 |
| <b>SMU_202c</b>  | -             | conserved hypothetical protein/Streptococcus-specific protein                              | 1.476 | 1.409 | 1.834 | 0.000 |
| <b>SMU_2030</b>  | <i>ctsR</i>   | transcriptional regulator of class III stress genes, CtsR                                  | 0.603 | 0.468 | 0.190 | 0.000 |
| <b>SMU_2031</b>  | <i>effS</i>   | translation elongation factor Ts                                                           | 0.000 | 0.000 | 0.000 | 0.000 |
| <b>SMU_2032</b>  | <i>rs2</i>    | 30S ribosomal protein S2                                                                   | 0.002 | 0.000 | 0.000 | 0.001 |
| <b>SMU_2033c</b> | -             | conserved hypothetical protein                                                             | 6.796 | 7.342 | 8.271 | 0.018 |
| <b>SMU_2035</b>  | <i>mccF</i>   | possible bacteriocin self-immunity protein                                                 | 2.163 | 2.999 | 2.915 | 0.002 |
| <b>SMU_2036</b>  | <i>pepO</i>   | endopeptidase O                                                                            | 0.725 | 0.575 | 0.663 | 0.001 |
| <b>SMU_2037</b>  | <i>treA</i>   | trehalose-6-phosphate hydrolase                                                            | 0.019 | 0.002 | 0.024 | 0.000 |



|                  |             |                                                                                                             |       |       |       |       |
|------------------|-------------|-------------------------------------------------------------------------------------------------------------|-------|-------|-------|-------|
| <b>SMU_2038</b>  | <i>treB</i> | phosphotransferase system, trehalose-specific IIBC component (EIIBC-tre)                                    | 1.666 | 1.705 | 2.257 | 0.029 |
| <b>SMU_2040</b>  | <i>treR</i> | trehalose operon transcriptional repressor (transcriptional regulator, GntR family)                         | 1.880 | 2.120 | 2.280 | 0.002 |
| <b>SMU_2042</b>  | <i>dexT</i> | dextranase ( 1,6-alpha-glucanhydrolase )                                                                    | 1.829 | 2.202 | 1.894 | 0.006 |
| <b>SMU_2043c</b> | <i>dtd</i>  | D-tyrosyl-tRNA deacylase                                                                                    | 1.136 | 1.125 | 1.377 | 0.001 |
| <b>SMU_2044</b>  | <i>relA</i> | GTP pyrophosphokinase                                                                                       | 0.415 | 0.018 | 0.002 | 0.001 |
| <b>SMU_2046c</b> | -           | conserved hypothetical protein                                                                              | 1.413 | 1.289 | 1.321 | 0.000 |
| <b>SMU_2047</b>  | <i>ptsG</i> | PTS system, enzyme II, A component                                                                          | 2.571 | 3.479 | 2.922 | 0.001 |
| <b>SMU_2048</b>  | -           | hypothetical protein                                                                                        | 0.365 | 0.487 | 0.417 | 0.002 |
| <b>SMU_2049c</b> | -           | conserved hypothetical protein                                                                              | 1.282 | 1.225 | 0.946 | 0.001 |
| <b>SMU_204c</b>  | -           | hypothetical protein                                                                                        | 1.293 | 1.205 | 1.150 | 0.000 |
| <b>SMU_2050c</b> | <i>prmA</i> | ribosomal protein L11 methylase                                                                             | 2.803 | 2.446 | 2.141 | 0.001 |
| <b>SMU_2052c</b> | -           | hypothetical protein                                                                                        | 1.449 | 1.731 | 1.766 | 0.001 |
| <b>SMU_2054c</b> | -           | conserved hypothetical protein                                                                              | 1.338 | 1.126 | 1.229 | 0.001 |
| <b>SMU_2055</b>  | -           | acetyltransferase                                                                                           | 1.427 | 1.501 | 1.344 | 0.000 |
| <b>SMU_2056</b>  | <i>csbA</i> | chromosome segregation helicase (ATPase related to the helicase subunit of the Holliday junction resolvase) | 1.290 | 1.346 | 1.358 | 0.000 |
| <b>SMU_2057c</b> | <i>cadA</i> | cadmium-efflux ATPase, E1-E2 (heavy metal-transporting ATPase)                                              | 2.094 | 1.239 | 1.399 | 0.003 |
| <b>SMU_2058</b>  | -           | transcriptional regulator                                                                                   | 1.490 | 1.706 | 1.866 | 0.000 |
| <b>SMU_2059c</b> | -           | conserved hypothetical protein; possible membrane protein                                                   | 1.798 | 2.303 | 2.023 | 0.003 |
| <b>SMU_205c</b>  | -           | conserved hypothetical protein                                                                              | 3.926 | 4.965 | 6.474 | 0.312 |
| <b>SMU_2060</b>  | <i>rscR</i> | transcriptional regulator, LysR family (possible RUBISCO transcriptional regulator, RscR)                   | 2.031 | 1.962 | 1.647 | 6.323 |
| <b>SMU_2061</b>  | -           | hypothetical protein                                                                                        | 2.970 | 2.707 | 2.493 | 0.002 |
| <b>SMU_2063</b>  | <i>hemZ</i> | ferrochelataase (heme synthetase) (protoheme ferro-lyase)                                                   | 2.046 | 2.327 | 2.530 | 0.000 |
| <b>SMU_2064c</b> | -           | hypothetical protein                                                                                        | 2.807 | 3.518 | 3.196 | 0.054 |
| <b>SMU_2065</b>  | <i>galE</i> | UDP-glucose 4-epimerase                                                                                     | 1.657 | 2.086 | 2.182 | 0.001 |
| <b>SMU_2066c</b> | -           | conserved hypothetical protein (possible integral membrane protein, ABC transporter)                        | 2.560 | 4.855 | 3.379 | 0.041 |
| <b>SMU_2067</b>  | <i>csbB</i> | stress response protein (glycosyltransferase) (sugar transferase)                                           | 1.998 | 2.186 | 2.171 | 0.284 |

|                  |             |                                                                                                                       |       |       |       |       |
|------------------|-------------|-----------------------------------------------------------------------------------------------------------------------|-------|-------|-------|-------|
| <b>SMU_2069</b>  | -           | conserved hypothetical protein (probable integral membrane protein)                                                   | 2.248 | 2.567 | 2.834 | 0.004 |
| <b>SMU_206c</b>  | -           | hypothetical protein                                                                                                  | 1.647 | 1.399 | 1.324 | 0.001 |
| <b>SMU_2070</b>  | -           | conserved hypothetical protein                                                                                        | 1.501 | 1.981 | 1.934 | 0.019 |
| <b>SMU_2071</b>  | <i>nrdG</i> | anaerobic ribonucleoside-triphosphate reductase activating protein (NrdD activating enzyme, generating glycy radical) | 1.629 | 0.893 | 1.856 | 0.001 |
| <b>SMU_2072c</b> | -           | possible acetyltransferase, GNAT family                                                                               | 1.466 | 1.263 | 2.006 | 0.005 |
| <b>SMU_2073c</b> | -           | conserved hypothetical protein                                                                                        | 0.712 | 0.862 | 0.664 | 0.000 |
| <b>SMU_2074</b>  | <i>nrdD</i> | anaerobic ribonucleoside-triphosphate reductase                                                                       | 1.285 | 0.404 | 0.992 | 0.001 |
| <b>SMU_2075c</b> | -           | conserved hypothetical protein (possible competence-induced protein)                                                  | 1.535 | 1.840 | 2.870 | 0.002 |
| <b>SMU_2076c</b> | -           | hypothetical protein                                                                                                  | 0.783 | 0.632 | 0.902 | 0.000 |
| <b>SMU_2077c</b> | -           | conserved hypothetical protein                                                                                        | 0.470 | 0.034 | 0.062 | 0.001 |
| <b>SMU_2078c</b> | -           | conserved hypothetical protein; possible Holliday junction resolvase-like protein                                     | 0.077 | 0.002 | 0.036 | 0.000 |
| <b>SMU_2079c</b> | -           | conserved hypothetical protein                                                                                        | 0.119 | 0.091 | 0.215 | 0.001 |
| <b>SMU_207c</b>  | -           | transcriptional regulator                                                                                             | 1.913 | 2.081 | 2.089 | 0.096 |
| <b>SMU_2080</b>  | -           | conserved hypothetical protein                                                                                        | 2.217 | 1.843 | 2.111 | 0.001 |
| <b>SMU_2081</b>  | -           | hypothetical protein                                                                                                  | 1.885 | 1.239 | 2.001 | 0.003 |
| <b>SMU_2083c</b> | -           | hypothetical protein                                                                                                  | 0.962 | 0.952 | 1.320 | 0.009 |
| <b>SMU_2084c</b> | -           | conserved hypothetical protein (possible arsenate reductase)                                                          | 0.704 | 0.176 | 0.251 | 0.020 |
| <b>SMU_2085</b>  | <i>recA</i> | recombinase A                                                                                                         | 0.648 | 0.014 | 0.001 | 0.001 |
| <b>SMU_2086</b>  | <i>cinA</i> | competence damage-inducible protein A                                                                                 | 0.855 | 0.696 | 0.340 | 0.000 |
| <b>SMU_2087</b>  | <i>tagI</i> | 3-methyladenine DNA glycosylase I                                                                                     | 0.703 | 0.795 | 0.742 | 0.002 |
| <b>SMU_2088</b>  | <i>ruvA</i> | Holliday junction DNA helicase                                                                                        | 0.432 | 0.013 | 0.024 | 0.001 |
| <b>SMU_2089</b>  | <i>hexB</i> | DNA mismatch repair protein                                                                                           | 1.178 | 1.472 | 1.717 | 0.022 |
| <b>SMU_208c</b>  | -           | conserved hypothetical protein, FtsK/SpoIIIE family                                                                   | 1.814 | 1.866 | 1.741 | 0.000 |
| <b>SMU_2090c</b> | -           | hypothetical protein                                                                                                  | 0.333 | 0.119 | 0.518 | 0.001 |
| <b>SMU_2091c</b> | <i>hexA</i> | DNA mismatch repair protein, HexA                                                                                     | 1.708 | 1.465 | 1.303 | 0.001 |
| <b>SMU_2092c</b> | -           | conserved hypothetical protein                                                                                        | 1.201 | 0.777 | 0.782 | 0.008 |
| <b>SMU_2093</b>  | <i>argR</i> | arginine repressor                                                                                                    | 0.006 | 0.000 | 0.000 | 0.001 |
| <b>SMU_2094c</b> | <i>arcE</i> | transcriptional regulator                                                                                             | 4.311 | 4.389 | 5.153 | 1.645 |
| <b>SMU_2096c</b> | -           | conserved hypothetical protein                                                                                        | 1.875 | 1.301 | 3.920 | 0.001 |

|                  |              |                                                                                   |       |        |        |         |
|------------------|--------------|-----------------------------------------------------------------------------------|-------|--------|--------|---------|
| <b>SMU_2097</b>  | <i>argR</i>  | arginine transcriptional repressor (arginine hydroxymate resistance protein)      | 1.695 | 1.407  | 1.619  | 0.794   |
| <b>SMU_2098</b>  | <i>argS</i>  | arginyl-tRNA synthetase                                                           | 0.016 | 0.035  | 0.031  | 0.000   |
| <b>SMU_2099c</b> | -            | conserved hypothetical protein                                                    | 1.613 | 1.149  | 2.609  | 0.020   |
| <b>SMU_209c</b>  | -            | hypothetical protein                                                              | 2.732 | 3.714  | 3.431  | 0.000   |
| <b>SMU_21</b>    | <i>mreD</i>  | cell shape-determining protein MreD                                               | 6.791 | 36.699 | 49.159 | 0.053   |
| <b>SMU_2100c</b> | -            | conserved hypothetical protein                                                    | 3.673 | 2.768  | 3.133  | 221.069 |
| <b>SMU_2101</b>  | <i>aspS</i>  | aspartyl-tRNA synthetase                                                          | 0.640 | 0.007  | 0.328  | 0.000   |
| <b>SMU_2102</b>  | <i>hisS</i>  | histidine-tRNA synthetase                                                         | 0.001 | 0.001  | 0.001  | 0.001   |
| <b>SMU_2104</b>  | <i>potE</i>  | aminoacid specific permease                                                       | 2.089 | 2.294  | 1.666  | 0.000   |
| <b>SMU_2104a</b> | <i>rl32</i>  | 50S ribosomal protein L32                                                         | 0.696 | 0.049  | 0.057  | 0.000   |
| <b>SMU_2105</b>  | -            | hypothetical protein                                                              | 0.553 | 0.660  | 0.730  | 0.000   |
| <b>SMU_2106c</b> | -            | hypothetical protein                                                              | 3.560 | 5.124  | 4.908  | 0.005   |
| <b>SMU_2107c</b> | -            | hypothetical protein                                                              | 1.027 | 0.939  | 0.937  | 0.000   |
| <b>SMU_2108c</b> | <i>mepR</i>  | transcriptional regulator, MepR protein (possible regulator of MepA)              | 2.078 | 2.900  | 2.694  | 0.001   |
| <b>SMU_2109</b>  | <i>mepA</i>  | possible multiple drug efflux pump MepA                                           | 2.137 | 2.524  | 3.009  | 0.088   |
| <b>SMU_210c</b>  | -            | hypothetical protein                                                              | 0.563 | 0.507  | 0.319  | 0.000   |
| <b>SMU_2111c</b> | <i>orf1</i>  | hypothetical protein                                                              | 2.978 | 4.193  | 3.663  | 0.001   |
| <b>SMU_2112</b>  | <i>gbpA</i>  | glucan-binding protein                                                            | 1.081 | 1.434  | 1.383  | 0.054   |
| <b>SMU_2113c</b> | -            | conserved hypothetical protein                                                    | 3.860 | 4.628  | 5.109  | 0.002   |
| <b>SMU_2114c</b> | <i>rmeD</i>  | probable transcriptional regulator, MerR family                                   | 1.698 | 2.076  | 2.260  | 0.002   |
| <b>SMU_2115</b>  | -            | probable oxidoreductase (probable short-chain dehydrogenase)                      | 2.146 | 2.831  | 2.666  | 0.000   |
| <b>SMU_2116</b>  | <i>opuCa</i> | glycine betaine / carnitine / choline ABC transporter, ATP-binding protein, opuCA | 1.902 | 2.018  | 1.955  | 0.155   |
| <b>SMU_2117</b>  | <i>opuCb</i> | glycine betaine / carnitine / choline ABC transporter permease                    | 2.275 | 2.543  | 2.331  | 0.001   |
| <b>SMU_2118</b>  | <i>opuCc</i> | glycine betaine/carnitine/choline ABC transporter, substrate-binding protein      | 3.328 | 3.627  | 4.333  | 0.000   |
| <b>SMU_2119</b>  | <i>opuCd</i> | ABC transport betaine/carnitine/choline permease                                  | 3.360 | 4.488  | 4.840  | 0.002   |
| <b>SMU_211c</b>  | -            | hypothetical protein                                                              | 6.332 | 6.836  | 8.791  | 0.226   |
| <b>SMU_2120c</b> | <i>3mgh</i>  | probable 3-methyladenine DNA glycosylase                                          | 1.955 | 1.917  | 2.106  | 0.000   |
| <b>SMU_2121c</b> | -            | conserved hypothetical protein                                                    | 3.624 | 4.097  | 4.635  | 0.000   |
| <b>SMU_2123</b>  | -            | hypothetical protein                                                              | 5.056 | 5.763  | 6.550  | 0.000   |
| <b>SMU_2124</b>  | -            | hypothetical protein                                                              | 0.474 | 1.260  | 1.763  | 0.000   |

|                                                |              |                                                                            |       |       |       |       |
|------------------------------------------------|--------------|----------------------------------------------------------------------------|-------|-------|-------|-------|
| <b>SMU_2125</b>                                | -            | conserved hypothetical protein (possible transcriptional regulator)        | 3.149 | 3.373 | 3.669 | 0.000 |
| <b>SMU_2126</b><br><b>c</b>                    | -            | possible phosphorylase                                                     | 0.955 | 1.159 | 1.167 | 0.000 |
| <b>SMU_2127</b>                                | <i>gabD</i>  | succinic semialdehyde dehydrogenase (NAD-dependent aldehyde dehydrogenase) | 1.336 | 1.483 | 1.523 | 0.000 |
| <b>SMU_2128</b><br><b>SMU_2129</b><br><b>c</b> | <i>dad</i>   | dihydroxy-acid dehydratase                                                 | 1.317 | 0.040 | 0.000 | 0.090 |
| <b>SMU_212c</b>                                | -            | conserved hypothetical protein                                             | 1.967 | 1.619 | 0.562 | 0.000 |
| <b>SMU_2130</b>                                | -            | hypothetical protein                                                       | 1.267 | 1.577 | 1.441 | 0.000 |
| <b>SMU_2130</b>                                | <i>shetA</i> | exfoliative toxin A                                                        | 1.786 | 2.054 | 2.223 | 0.001 |
| <b>SMU_2131</b>                                | -            | hypothetical protein                                                       | 1.862 | 2.027 | 2.271 | 0.009 |
| <b>SMU_2133</b><br><b>c</b>                    | -            | conserved hypothetical protein (possible transmembrane protein)            | 1.582 | 1.739 | 1.991 | 0.083 |
| <b>SMU_2134</b>                                | -            | transcriptional regulator, TetR/AcrR family                                | 2.198 | 3.263 | 4.962 | 0.009 |
| <b>SMU_2135</b><br><b>c</b>                    | <i>rpsD</i>  | 30S Ribosomal protein S4                                                   | 0.004 | 0.001 | 0.000 | 0.000 |
| <b>SMU_2136</b><br><b>c</b>                    | -            | hypothetical protein                                                       | 0.561 | 0.468 | 0.655 | 0.000 |
| <b>SMU_2137</b><br><b>c</b>                    | -            | conserved hypothetical protein                                             | 1.608 | 0.015 | 0.028 | 0.002 |
| <b>SMU_2138</b>                                | <i>dnaC</i>  | replicative DNA helicase                                                   | 0.030 | 0.063 | 0.163 | 0.003 |
| <b>SMU_2139</b><br><b>c</b>                    | <i>rl9</i>   | 50S ribosomal protein L9                                                   | 0.345 | 0.556 | 0.587 | 0.000 |
| <b>SMU_213c</b>                                | -            | hypothetical protein                                                       | 5.728 | 6.520 | 8.098 | 0.002 |
| <b>SMU_2142</b>                                | <i>rpiA</i>  | sugar-phosphate isomerase (ribose 5-phosphate isomerase)                   | 0.173 | 0.140 | 0.231 | 0.002 |
| <b>SMU_2143</b><br><b>c</b>                    | <i>trmU</i>  | tRNA (5-methylaminomethyl-2-thiouridylate)-methyltransferase               | 0.003 | 0.003 | 0.001 | 0.001 |
| <b>SMU_2146</b><br><b>c</b>                    | -            | conserved hypothetical protein                                             | 0.876 | 0.302 | 0.559 | 0.002 |
| <b>SMU_2147</b><br><b>c</b>                    | -            | conserved hypothetical protein                                             | 0.739 | 1.001 | 0.552 | 0.001 |
| <b>SMU_2148</b><br><b>c</b>                    | -            | ABC transporter, membrane-spanning permease                                | 0.037 | 0.029 | 0.002 | 0.007 |
| <b>SMU_2149</b><br><b>c</b>                    | -            | ABC transporter, ATP-binding protein                                       | 0.003 | 0.000 | 0.001 | 0.006 |
| <b>SMU_214c</b>                                | -            | hypothetical protein                                                       | 1.498 | 2.842 | 3.979 | 0.002 |
| <b>SMU_2150</b><br><b>c</b>                    | -            | ABC transporter, ATP-binding protein                                       | 0.015 | 0.018 | 0.004 | 0.000 |
| <b>SMU_2151</b>                                | <i>pgsA</i>  | CDP-diacylglycerol--glycerol-3-phosphate 3-phosphatidyltransferase         | 0.000 | 0.000 | 0.000 | 0.001 |
| <b>SMU_2152</b><br><b>c</b>                    | <i>rodZ</i>  | conserved hypothetical protein                                             | 1.093 | 2.377 | 8.430 | 0.001 |
| <b>SMU_2153</b><br><b>c</b>                    | -            | peptidase, M16 family                                                      | 5.683 | 5.252 | 7.097 | 0.001 |
| <b>SMU_2154</b><br><b>c</b>                    | -            | peptidase, M16 family                                                      | 2.772 | 2.100 | 2.791 | 0.002 |
| <b>SMU_2155</b>                                | -            | conserved hypothetical protein                                             | 0.670 | 0.373 | 0.552 | 0.002 |
| <b>SMU_2156</b>                                | <i>recF</i>  | recombination protein F (DNA replication and repair ATPase)                | 0.633 | 0.061 | 0.102 | 0.001 |

|                  |             |                                                                |        |        |        |       |
|------------------|-------------|----------------------------------------------------------------|--------|--------|--------|-------|
| <b>SMU_2157</b>  | <i>guaB</i> | inosine-5'- monophosphate dehydrogenase                        | 0.346  | 0.036  | 0.134  | 0.002 |
| <b>SMU_2158c</b> | <i>trsA</i> | tryptophanyl-tRNA synthetase                                   | 0.004  | 0.007  | 0.018  | 0.001 |
| <b>SMU_2159</b>  | -           | ABC transporter, ATP-binding protein                           | 2.234  | 1.728  | 2.089  | 0.011 |
| <b>SMU_215c</b>  | -           | hypothetical protein                                           | 0.593  | 0.814  | 0.646  | 0.000 |
| <b>SMU_2160</b>  | -           | possible permease, ABC transporter protein                     | 4.825  | 5.531  | 6.264  | 0.010 |
| <b>SMU_2161c</b> | -           | conserved hypothetical protein                                 | 12.958 | 14.802 | 14.508 | 0.051 |
| <b>SMU_2162c</b> | -           | conserved hypothetical protein                                 | 0.561  | 0.383  | 0.268  | 0.000 |
| <b>SMU_2164</b>  | <i>htrA</i> | serine protease                                                | 1.725  | 1.745  | 1.635  | 0.002 |
| <b>SMU_2165</b>  | <i>smc</i>  | chromosome segregation protein, ParB-like nuclease domain      | 2.073  | 0.326  | 0.630  | 0.000 |
| <b>SMU_2166</b>  | <i>rpIW</i> | Ribosomal protein L23                                          | 0.000  | 0.000  | 0.000  | 0.000 |
| <b>SMU_2167</b>  | <i>rpIB</i> | Ribosomal protein L2                                           | 0.012  | 0.000  | 0.000  | 0.001 |
| <b>SMU_216c</b>  | -           | hypothetical protein                                           | 2.942  | 5.148  | 4.982  | 0.001 |
| <b>SMU_217c</b>  | -           | conserved hypothetical protein; Streptococcus-specific protein | 3.294  | 4.024  | 4.112  | 0.000 |
| <b>SMU_218</b>   | -           | transcriptional regulator                                      | 0.066  | 0.001  | 0.003  | 0.017 |
| <b>SMU_219</b>   | -           | hypothetical protein                                           | 3.228  | 3.660  | 2.340  | 0.001 |
| <b>SMU_22</b>    | <i>gbpB</i> | glucan-binding protein B                                       | 0.000  | 0.000  | 0.000  | 0.000 |
| <b>SMU_220c</b>  | -           | hypothetical protein                                           | 7.753  | 7.561  | 12.199 | 0.002 |
| <b>SMU_221c</b>  | -           | phage-related integrase, truncated                             | 5.786  | 6.264  | 5.992  | 0.002 |
| <b>SMU_222c</b>  | -           | hypothetical protein (possible integrase fragment)             | 1.574  | 1.912  | 2.147  | 0.000 |
| <b>SMU_223c</b>  | -           | hypothetical protein                                           | 2.037  | 2.127  | 1.594  | 0.000 |
| <b>SMU_224c</b>  | -           | hypothetical protein                                           | 3.685  | 3.431  | 4.174  | 0.002 |
| <b>SMU_225c</b>  | -           | hypothetical protein                                           | 1.029  | 2.096  | 3.096  | 0.002 |
| <b>SMU_226c</b>  | <i>tpn</i>  | transposase, IS1216, also reported on plasmid, truncated       | 1.189  | 1.432  | 0.997  | 0.000 |
| <b>SMU_227c</b>  | -           | conserved hypothetical protein                                 | 8.658  | 13.425 | 8.470  | 0.011 |
| <b>SMU_228</b>   | -           | alkaline-shock protein homolog                                 | 0.125  | 0.010  | 0.037  | 0.021 |
| <b>SMU_229</b>   | -           | conserved hypothetical protein (possible kinase)               | 0.262  | 0.001  | 0.232  | 0.000 |
| <b>SMU_23</b>    | <i>prs</i>  | phosphoribosyl pyrophosphate synthetase (PRPP synthetase)      | 0.002  | 0.000  | 0.001  | 0.001 |
| <b>SMU_231</b>   | <i>ilvB</i> | acetolactate synthase, large subunit (AHAS)                    | 0.972  | 0.053  | 0.018  | 0.001 |
| <b>SMU_232</b>   | <i>ilvH</i> | acetolactate synthase, small subunit                           | 1.509  | 0.589  | 0.954  | 0.000 |
| <b>SMU_233</b>   | <i>ilvC</i> | ketol-acid reductoisomerase                                    | 0.933  | 0.042  | 0.000  | 0.000 |
| <b>SMU_234</b>   | <i>ilvA</i> | threonine dehydratase                                          | 1.576  | 1.678  | 0.969  | 0.000 |
| <b>SMU_235</b>   | -           | conserved hypothetical protein, SPFH domain/band 7 family      | 1.947  | 2.423  | 1.185  | 0.002 |
| <b>SMU_236c</b>  | <i>ycdC</i> | transcriptional regulator                                      | 0.908  | 0.409  | 0.405  | 0.000 |
| <b>SMU_237c</b>  | <i>drrB</i> | ABC transporter multidrug permease protein                     | 3.160  | 2.737  | 2.708  | 0.003 |
| <b>SMU_238c</b>  | -           | ABC transporter, ATP-binding protein                           | 1.721  | 1.288  | 1.477  | 0.002 |

|                 |             |                                                                    |       |       |       |         |
|-----------------|-------------|--------------------------------------------------------------------|-------|-------|-------|---------|
| <b>SMU_239c</b> | -           | conserved hypothetical protein                                     | 2.586 | 2.690 | 3.648 | 0.278   |
| <b>SMU_24</b>   | <i>aspC</i> | aspartate or aromatic amino acid aminotransferase                  | 0.010 | 0.031 | 0.069 | 0.038   |
| <b>SMU_241c</b> | -           | amino acid ABC transporter, ATP-binding protein                    | 0.688 | 0.097 | 0.303 | 0.000   |
| <b>SMU_242c</b> | -           | glutamine ABC transporter, solute binding protein                  | 3.979 | 0.468 | 1.475 | 0.002   |
| <b>SMU_243</b>  | -           | conserved hypothetical protein                                     | 0.814 | 0.631 | 0.496 | 0.124   |
| <b>SMU_244</b>  | <i>bacA</i> | undecaprenyl-diphosphatase; bacitracin resistance protein          | 0.080 | 0.036 | 0.037 | 0.001   |
| <b>SMU_245</b>  | <i>mecA</i> | negative regulator of genetic competence                           | 0.426 | 4.722 | 0.084 | 0.005   |
| <b>SMU_246</b>  | <i>rgpG</i> | polysaccharide biosynthesis protein, glycosyl transferase family 4 | 0.050 | 0.277 | 0.001 | 0.002   |
| <b>SMU_247</b>  | <i>sufC</i> | ABC transporter, ATP-binding protein                               | 0.788 | 0.003 | 0.000 | 0.000   |
| <b>SMU_248</b>  | -           | ABC transporter permease                                           | 1.148 | 0.005 | 0.000 | 0.000   |
| <b>SMU_249</b>  | <i>nifS</i> | class-V aminotransferase, NifS protein homolog,                    | 1.433 | 0.007 | 0.002 | 0.000   |
| <b>SMU_25</b>   | <i>recO</i> | DNA repair protein RecO (recombination protein O)                  | 1.012 | 0.021 | 0.013 | 0.000   |
| <b>SMU_250</b>  | <i>nifU</i> | nitrogen fixation-like protein, NifU                               | 0.804 | 0.004 | 0.000 | 0.010   |
| <b>SMU_251</b>  | -           | ABC transporter permease                                           | 1.026 | 0.008 | 0.020 | 0.000   |
| <b>SMU_252</b>  | -           | hypothetical protein                                               | 1.907 | 1.884 | 1.637 | 0.000   |
| <b>SMU_253</b>  | <i>dacA</i> | D-alanyl-D-alanine carboxypeptidase; penicillin-binding protein    | 1.667 | 2.242 | 3.244 | 0.001   |
| <b>SMU_255</b>  | <i>oppA</i> | oligopeptide ABC transporter, OppA                                 | 1.888 | 1.462 | 1.964 | 145.914 |
| <b>SMU_256</b>  | <i>oppB</i> | oligopeptide ABC transporter, permease                             | 1.487 | 0.794 | 1.219 | 2.527   |
| <b>SMU_257</b>  | <i>oppC</i> | oligopeptide ABC transporter, permease                             | 1.663 | 1.136 | 2.012 | 253.083 |
| <b>SMU_258</b>  | <i>oppD</i> | oligopeptide ABC transporter, ATP-binding                          | 1.285 | 0.915 | 1.404 | 105.258 |
| <b>SMU_259</b>  | <i>oppF</i> | oligopeptide ABC transporter, ATP-binding                          | 1.181 | 1.047 | 1.013 | 57.069  |
| <b>SMU_26</b>   | <i>plsX</i> | fatty acid/phospholipid synthesis protein                          | 0.194 | 0.005 | 0.003 | 0.001   |
| <b>SMU_260</b>  | -           | conserved hypothetical protein                                     | 1.559 | 2.104 | 2.858 | 5.102   |
| <b>SMU_261c</b> | <i>aguR</i> | transcriptional regulator                                          | 2.635 | 2.582 | 3.112 | 0.001   |
| <b>SMU_262</b>  | <i>otcA</i> | ornithine carbamoyltransferase                                     | 1.727 | 1.453 | 1.748 | 0.427   |
| <b>SMU_263</b>  | <i>aguD</i> | amino acid permease /putrescine antiporter                         | 1.477 | 1.715 | 1.910 | 0.001   |
| <b>SMU_264</b>  | <i>aguA</i> | agmatine deiminase                                                 | 1.647 | 1.559 | 1.711 | 0.000   |
| <b>SMU_265</b>  | <i>arcC</i> | carbamate kinase                                                   | 1.370 | 1.258 | 1.324 | 0.000   |
| <b>SMU_267c</b> | <i>gcl</i>  | glutamate--cysteine ligase (gamma ECS)                             | 2.047 | 2.640 | 1.837 | 0.069   |
| <b>SMU_268</b>  | <i>purA</i> | adenylosuccinate synthetase                                        | 0.921 | 0.144 | 0.680 | 0.004   |
| <b>SMU_27</b>   | <i>acpP</i> | acyl carrier protein                                               | 0.107 | 0.021 | 0.106 | 0.000   |
| <b>SMU_270</b>  | <i>sgaT</i> | ribulose monophosphate PTS pathway enzyme IIC                      | 1.907 | 1.474 | 1.893 | 0.001   |

|          |             |                                                                |        |        |        |        |
|----------|-------------|----------------------------------------------------------------|--------|--------|--------|--------|
| SMU_271  | <i>ptxB</i> | PTS system, enzyme IIB component                               | 2.443  | 3.026  | 4.997  | 0.000  |
| SMU_272  | <i>ptxA</i> | PTS system, enzyme IIA component                               | 1.333  | 1.168  | 1.402  | 0.012  |
| SMU_273  | <i>rmpD</i> | hexulose-6-phosphate synthase                                  | 1.459  | 1.229  | 1.994  | 0.001  |
| SMU_274  | <i>rmpE</i> | hexulose-6-phosphate isomerase                                 | 1.604  | 2.710  | 2.395  | 0.001  |
| SMU_275  | <i>rmpF</i> | L-ribulose 5-phosphate 4-epimerase                             | 1.660  | 2.090  | 2.122  | 0.000  |
| SMU_276c | -           | hypothetical protein                                           | 3.558  | 3.518  | 4.338  | 0.011  |
| SMU_277  | -           | hypothetical protein                                           | 6.000  | 5.888  | 7.272  | 0.481  |
| SMU_278  | -           | hypothetical protein                                           | 5.216  | 5.496  | 4.377  | 0.000  |
| SMU_279  | -           | hypothetical protein                                           | 25.453 | 28.141 | 29.435 | 0.001  |
| SMU_28   | <i>comA</i> | ABC transporter, ATP-binding protein                           | 1.270  | 1.173  | 1.102  | 0.000  |
| SMU_281  | -           | hypothetical protein                                           | 1.770  | 1.571  | 1.298  | 0.000  |
| SMU_283  | -           | hypothetical protein                                           | 2.859  | 4.061  | 4.298  | 0.000  |
| SMU_284  | -           | hypothetical protein                                           | 3.107  | 3.747  | 4.468  | 0.009  |
| SMU_286  | <i>comA</i> | competence factor transporting ATP-binding/permease protein    | 1.874  | 2.566  | 4.778  | 0.110  |
| SMU_287  | <i>comB</i> | ABC transport protein ComB, accessory factor for ComA          | 0.793  | 1.194  | 1.206  | 0.213  |
| SMU_289  | -           | transcriptional antiterminator                                 | 3.305  | 3.805  | 5.518  | 0.001  |
| SMU_29   | <i>purC</i> | phosphoribosylaminoimidazole-succinocarboxamide synthase       | 1.003  | 0.540  | 0.659  | 0.037  |
| SMU_290  | -           | conserved hypothetical protein                                 | 2.439  | 2.693  | 3.038  | 0.000  |
| SMU_291  | <i>tkt</i>  | transketolase                                                  | 0.012  | 0.000  | 0.000  | 0.000  |
| SMU_292  | -           | transcriptional regulator, probable AraC family                | 1.440  | 0.954  | 0.817  | 0.002  |
| SMU_293  | -           | hypothetical protein                                           | 2.208  | 1.657  | 1.333  | 0.000  |
| SMU_294  | -           | conserved hypothetical protein                                 | 2.003  | 2.587  | 2.383  | 0.000  |
| SMU_295  | -           | hypothetical protein                                           | 1.396  | 1.213  | 1.385  | 0.002  |
| SMU_296  | -           | conserved hypothetical protein                                 | 2.599  | 1.957  | 2.011  | 0.001  |
| SMU_297  | <i>poll</i> | DNA polymerase I                                               | 0.159  | 0.063  | 0.046  | 0.000  |
| SMU_298  | -           | conserved hypothetical protein                                 | 0.403  | 0.322  | 0.447  | 0.000  |
| SMU_299c | <i>ip</i>   | bacteriocin peptide precursor                                  | 2.855  | 4.712  | 3.563  | 0.000  |
| SMU_30   | <i>purL</i> | phosphoribosylformylglycinamide synthase                       | 1.218  | 0.793  | 0.665  | 0.012  |
| SMU_300  | <i>tgt</i>  | tRNA-guanine transglycosylase; queuine tRNA-ribosyltransferase | 1.146  | 1.050  | 0.887  | 0.113  |
| SMU_301  | -           | conserved hypothetical protein                                 | 1.046  | 1.109  | 1.008  | 0.001  |
| SMU_302  | -           | conserved hypothetical protein                                 | 2.716  | 2.741  | 3.294  | 1.379  |
| SMU_303  | -           | conserved hypothetical protein                                 | 1.021  | 0.633  | 0.848  | 0.189  |
| SMU_304  | <i>cdd</i>  | cytidine/ deoxycytidylate deaminase                            | 0.698  | 0.002  | 0.000  | 0.000  |
| SMU_305  | -           | conserved hypothetical protein                                 | 1.704  | 1.776  | 1.512  | 19.892 |
| SMU_307  | <i>pgi</i>  | glucose-6-phosphate isomerase                                  | 0.000  | 0.000  | 0.000  | 0.001  |
| SMU_308  | <i>srlD</i> | sorbitol-6-phosphate 2-dehydrogenase                           | 0.823  | 0.457  | 0.378  | 0.001  |
| SMU_309  | <i>srlR</i> | regulator of sorbitol operon                                   | 1.460  | 0.827  | 1.173  | 0.000  |
| SMU_31   | -           | conserved hypothetical protein                                 | 1.558  | 1.586  | 1.552  | 0.000  |
| SMU_310  | <i>srlM</i> | sorbitol operon activator                                      | 2.960  | 1.729  | 3.089  | 0.001  |
| SMU_311  | <i>srlA</i> | PTS system, sorbitol (glucitol) phosphotransferase enzyme IIC2 | 1.702  | 1.779  | 1.826  | 8.563  |

|                 |              |                                                                   |       |       |       |       |
|-----------------|--------------|-------------------------------------------------------------------|-------|-------|-------|-------|
| <b>SMU_312</b>  | <i>srlE</i>  | PTS system, sorbitol phosphotransferase enzyme IIBC               | 1.099 | 1.074 | 1.016 | 0.001 |
| <b>SMU_313</b>  | <i>srlB</i>  | PTS system, sorbitol-specific enzyme IIA                          | 2.561 | 2.131 | 1.771 | 0.000 |
| <b>SMU_314</b>  | -            | hypothetical protein                                              | 2.736 | 2.857 | 2.888 | 0.001 |
| <b>SMU_317</b>  | <i>dapD</i>  | tetrahydrodipicolinate succinylase                                | 0.264 | 0.001 | 0.000 | 0.000 |
| <b>SMU_318</b>  | <i>hipO</i>  | peptidase/aminoacylase/hippurate hydrolase                        | 1.692 | 0.945 | 0.528 | 0.003 |
| <b>SMU_32</b>   | <i>purF</i>  | amidophosphoribosyltransferase                                    | 1.339 | 1.412 | 1.331 | 0.107 |
| <b>SMU_320</b>  | -            | probable 5-formyltetrahydrofolate cyclo-ligase                    | 0.996 | 1.418 | 0.999 | 0.000 |
| <b>SMU_321</b>  | -            | conserved hypothetical protein, Rhomboid family                   | 0.570 | 0.487 | 0.486 | 0.001 |
| <b>SMU_322c</b> | <i>galU</i>  | glucose-1-phosphate uridylyltransferase                           | 0.000 | 0.000 | 0.000 | 0.001 |
| <b>SMU_323</b>  | <i>gpsA</i>  | glycerol-3-phosphate dehydrogenase (NAD(P)+)                      | 0.000 | 0.000 | 0.000 | 0.002 |
| <b>SMU_325</b>  | <i>dutA</i>  | dUTP diphosphatase (dUTPase)                                      | 0.387 | 0.029 | 0.002 | 0.001 |
| <b>SMU_326</b>  | -            | conserved hypothetical protein                                    | 2.044 | 2.279 | 1.555 | 0.001 |
| <b>SMU_327</b>  | <i>radA</i>  | DNA repair protein                                                | 1.135 | 0.978 | 0.657 | 0.004 |
| <b>SMU_328</b>  | -            | conserved hypothetical protein; possible carbonic anhydrase       | 2.507 | 0.002 | 1.160 | 0.001 |
| <b>SMU_329</b>  | -            | conserved hypothetical protein                                    | 1.063 | 0.495 | 1.086 | 2.477 |
| <b>SMU_33</b>   | -            | hypothetical protein                                              | 1.112 | 1.713 | 1.998 | 0.000 |
| <b>SMU_330</b>  | <i>gltX</i>  | glutamyl-tRNA synthetase                                          | 0.000 | 0.000 | 0.000 | 0.000 |
| <b>SMU_331</b>  | -            | transcriptional regulator                                         | 0.210 | 0.171 | 0.159 | 0.000 |
| <b>SMU_332</b>  | -            | conserved hypothetical protein                                    | 1.383 | 1.012 | 0.974 | 0.011 |
| <b>SMU_333</b>  | -            | conserved hypothetical protein                                    | 1.943 | 0.958 | 1.350 | 0.003 |
| <b>SMU_334</b>  | <i>argG</i>  | argininosuccinate synthase                                        | 1.938 | 1.880 | 1.820 | 0.000 |
| <b>SMU_335</b>  | <i>argH</i>  | argininosuccinate lyase                                           | 2.125 | 2.166 | 2.401 | 0.139 |
| <b>SMU_336</b>  | <i>mmpA</i>  | ribonuclease P protein component                                  | 0.529 | 1.777 | 0.586 | 0.001 |
| <b>SMU_337</b>  | <i>yidC1</i> | inner membrane protein                                            | 1.299 | 0.850 | 0.216 | 0.001 |
| <b>SMU_338</b>  | <i>jag</i>   | conserved hypothetical protein, Jag protein                       | 1.059 | 0.084 | 0.111 | 0.001 |
| <b>SMU_339</b>  | -            | hypothetical protein                                              | 2.676 | 1.920 | 1.615 | 0.002 |
| <b>SMU_34</b>   | <i>purM</i>  | phosphoribosylformylglycinamide cyclo-ligase (AIRS)               | 1.088 | 0.802 | 0.716 | 0.000 |
| <b>SMU_340</b>  | <i>rpmH</i>  | 50S ribosomal protein L34                                         | 0.092 | 0.000 | 0.000 | 0.000 |
| <b>SMU_341</b>  | <i>yabD</i>  | conserved hypothetical protein (possible deoxyribonuclease)       | 2.208 | 1.325 | 1.241 | 0.203 |
| <b>SMU_342</b>  | -            | possible primase-related protein                                  | 0.985 | 0.100 | 0.138 | 0.001 |
| <b>SMU_343</b>  | -            | conserved hypothetical protein                                    | 1.200 | 0.852 | 0.907 | 0.002 |
| <b>SMU_344</b>  | -            | hypothetical protein                                              | 0.781 | 0.215 | 0.105 | 0.004 |
| <b>SMU_345c</b> | -            | conserved hypothetical protein (possible transcription regulator) | 0.524 | 0.708 | 0.435 | 0.000 |
| <b>SMU_346</b>  | <i>nrd</i>   | NADH dehydrogenase; NAD(P)H nitroreductase                        | 0.993 | 0.551 | 0.549 | 0.003 |
| <b>SMU_348</b>  | <i>pht</i>   | histidine triad (HIT) hydrolase                                   | 0.453 | 0.168 | 0.169 | 0.000 |
| <b>SMU_349</b>  | <i>ksgA</i>  | dimethyladenosine transferase                                     | 0.648 | 0.223 | 0.114 | 0.001 |
| <b>SMU_35</b>   | <i>purN</i>  | phosphoribosylglycinamide formyltransferase                       | 0.994 | 0.896 | 0.876 | 0.001 |



|          |             |                                                                                      |       |       |       |         |
|----------|-------------|--------------------------------------------------------------------------------------|-------|-------|-------|---------|
| SMU_350  | -           | hypothetical protein                                                                 | 0.594 | 0.403 | 0.466 | 0.001   |
| SMU_351  | -           | conserved hypothetical protein, possible GTPase                                      | 1.368 | 0.056 | 0.130 | 0.002   |
| SMU_352  | <i>rpe</i>  | ribulose-phosphate-3-epimerase                                                       | 0.016 | 0.001 | 0.000 | 0.001   |
| SMU_353  | -           | thiamine pyrophosphokinase                                                           | 0.022 | 0.000 | 0.000 | 0.001   |
| SMU_354  | -           | conserved hypothetical protein                                                       | 0.721 | 0.421 | 0.608 | 0.001   |
| SMU_355  | <i>cbf1</i> | CMP-binding factor 1                                                                 | 1.022 | 0.709 | 0.584 | 1.966   |
| SMU_356  | <i>purR</i> | purine operon repressor/xanthine phosphoribosyltransferase                           | 0.607 | 0.286 | 0.196 | 0.000   |
| SMU_357  | <i>rpsL</i> | 30S ribosomal protein S12                                                            | 0.000 | 0.000 | 0.000 | 0.000   |
| SMU_358  | <i>rpsG</i> | 30S ribosomal protein S7                                                             | 0.000 | 0.000 | 0.000 | 0.000   |
| SMU_359  | <i>efg</i>  | translation elongation factor G/EF-2                                                 | 0.001 | 0.000 | 0.000 | 0.000   |
| SMU_36   | -           | conserved hypothetical protein (eukaryotic-like)                                     | 2.178 | 2.184 | 2.232 | 0.000   |
| SMU_360  | <i>gapC</i> | glyceraldehyde-3-phosphate dehydrogenase; plasmin receptor                           | 0.000 | 0.000 | 0.000 | 0.002   |
| SMU_361  | <i>pgk</i>  | phosphoglycerate kinase                                                              | 0.001 | 0.001 | 0.000 | 0.000   |
| SMU_362  | -           | Streptococcus-specific protein                                                       | 3.312 | 2.150 | 1.557 | 0.012   |
| SMU_363  | <i>glnR</i> | transcriptional regulator; glutamine synthetase repressor                            | 0.882 | 0.233 | 0.093 | 0.001   |
| SMU_364  | <i>glnA</i> | glutamine synthetase type 1                                                          | 4.083 | 0.001 | 0.001 | 0.000   |
| SMU_365  | <i>gltA</i> | glutamate synthase, large subunit                                                    | 1.195 | 1.291 | 1.352 | 0.040   |
| SMU_366  | <i>gltB</i> | glutamate synthase, small subunit                                                    | 1.391 | 1.247 | 0.985 | 0.008   |
| SMU_367  | -           | Streptococcus-specific protein; similar to glucan-binding protein                    | 1.915 | 2.018 | 1.987 | 0.001   |
| SMU_368c | -           | metallo-beta-lactamase superfamily protein                                           | 0.002 | 0.000 | 0.002 | 0.002   |
| SMU_369c | -           | conserved hypothetical protein                                                       | 0.037 | 0.000 | 0.002 | 0.000   |
| SMU_37   | <i>purH</i> | phosphoribosylaminoimidazolecarboxamide formyltransferase / IMP cyclohydrolase       | 1.273 | 1.349 | 0.926 | 0.000   |
| SMU_370  | -           | ABC transporter, ATP-binding protein                                                 | 2.709 | 1.699 | 1.435 | 0.002   |
| SMU_371  | -           | Streptococcus-specific protein; possible ABC transporter, membrane spanning permease | 2.329 | 2.391 | 2.821 | 0.001   |
| SMU_372  | -           | hypothetical protein                                                                 | 3.390 | 4.377 | 5.079 | 0.005   |
| SMU_373  | -           | hypothetical protein                                                                 | 2.155 | 2.575 | 3.259 | 7.073   |
| SMU_374  | -           | oxidoreductase/ dehydrogenase                                                        | 2.533 | 2.546 | 2.604 | 0.001   |
| SMU_375  | -           | hypothetical protein                                                                 | 5.595 | 6.942 | 6.910 | 113.365 |
| SMU_376  | -           | aminotransferase                                                                     | 1.702 | 2.115 | 2.545 | 0.000   |
| SMU_378  | -           | hypothetical protein                                                                 | 5.637 | 5.487 | 6.161 | 0.001   |
| SMU_379  | -           | hypothetical protein                                                                 | 0.882 | 0.508 | 0.428 | 0.000   |
| SMU_381c | -           | transcriptional regulator                                                            | 0.894 | 1.198 | 1.289 | 0.001   |
| SMU_382c | -           | conserved hypothetical protein (possible oxidoreductase)                             | 0.964 | 1.345 | 1.052 | 0.000   |
| SMU_383c | -           | undetermined reductase or epimerase                                                  | 2.232 | 2.251 | 1.998 | 2.212   |
| SMU_384  | -           | hypothetical protein (possible transcriptional regulator)                            | 0.956 | 0.834 | 0.655 | 0.001   |

|          |             |                                                                          |       |        |       |       |
|----------|-------------|--------------------------------------------------------------------------|-------|--------|-------|-------|
| SMU_385  | -           | probable glycoprotein endopeptidase                                      | 0.091 | 0.000  | 0.000 | 0.000 |
| SMU_386  | <i>rimI</i> | ribosomal-protein-alanine transferase                                    | 0.785 | 0.767  | 0.696 | 0.001 |
| SMU_387  | <i>gcp</i>  | O-sialoglycoprotein endopeptidase                                        | 0.275 | 0.025  | 0.073 | 0.001 |
| SMU_388  | -           | possible branched-chain amino acid permease                              | 1.010 | 0.985  | 1.034 | 0.002 |
| SMU_389  | -           | conserved hypothetical protein                                           | 0.523 | 0.677  | 0.413 | 0.000 |
| SMU_38c  | -           | AcrR/TetR related transcriptional regulator                              | 3.347 | 3.428  | 4.309 | 0.001 |
| SMU_39   | -           | conserved hypothetical protein                                           | 5.413 | 6.226  | 8.472 | 0.002 |
| SMU_390  | -           | hypothetical protein                                                     | 0.241 | 0.704  | 1.026 | 0.000 |
| SMU_391c | -           | conserved hypothetical protein                                           | 1.937 | 1.238  | 1.126 | 0.001 |
| SMU_392c | -           | conserved hypothetical protein, HI0933-like                              | 1.160 | 1.155  | 1.409 | 0.001 |
| SMU_393  | -           | conserved hypothetical protein                                           | 0.006 | 0.000  | 0.000 | 0.000 |
| SMU_394c | -           | conserved hypothetical protein                                           | 1.104 | 1.271  | 1.420 | 0.000 |
| SMU_395  | <i>pepX</i> | X-prolyl dipeptidyl-peptidase                                            | 1.641 | 1.695  | 1.805 | 0.471 |
| SMU_396  | <i>glpF</i> | glycerol uptake facilitator protein                                      | 1.001 | 0.000  | 0.001 | 0.051 |
| SMU_399  | <i>cppA</i> | C3-degrading proteinase                                                  | 1.635 | 0.605  | 0.383 | 0.001 |
| SMU_40   | -           | conserved hypothetical protein                                           | 2.527 | 3.449  | 4.524 | 0.000 |
| SMU_400  | -           | beta-lactamase family protein                                            | 2.462 | 2.683  | 2.548 | 0.096 |
| SMU_401c | -           | acetyltransferase                                                        | 0.688 | 0.625  | 0.711 | 0.074 |
| SMU_402  | <i>pfl</i>  | pyruvate formate-lyase                                                   | 2.044 | 1.764  | 1.396 | 0.000 |
| SMU_403  | <i>dinP</i> | nucleotidyltransferase/DNA polymerase involved in DNA repair             | 1.001 | 0.934  | 1.061 | 0.000 |
| SMU_404c | -           | hypothetical protein                                                     | 1.857 | 2.052  | 1.875 | 0.001 |
| SMU_405c | -           | transcriptional regulator                                                | 1.122 | 1.344  | 1.511 | 0.004 |
| SMU_406c | -           | haloacid dehalogenase-like hydrolase                                     | 0.925 | 0.924  | 1.618 | 0.000 |
| SMU_407  | -           | conserved hypothetical protein                                           | 2.246 | 2.527  | 2.232 | 0.016 |
| SMU_408  | -           | xanthine/uracil permease family protein                                  | 0.997 | 1.269  | 0.495 | 0.008 |
| SMU_409  | -           | conserved hypothetical protein                                           | 0.114 | 0.002  | 0.004 | 0.060 |
| SMU_41   | -           | hypothetical protein (protein)                                           | 3.789 | 3.643  | 3.544 | 0.000 |
| SMU_410  | <i>brpA</i> | transcriptional regulator                                                | 2.523 | 10.075 | 0.145 | 0.001 |
| SMU_411c | -           | Streptococcus-specific protein                                           | 0.580 | 1.205  | 0.637 | 0.000 |
| SMU_412c | -           | Hit-like protein                                                         | 0.866 | 0.955  | 0.656 | 0.000 |
| SMU_413  | -           | ABC transporter, ATP-binding protein                                     | 0.488 | 0.281  | 0.130 | 0.001 |
| SMU_414  | -           | ABC transporter permease                                                 | 0.751 | 0.520  | 0.259 | 0.001 |
| SMU_415  | -           | conserved hypothetical protein, phosphotransferase enzyme family         | 0.000 | 0.000  | 0.000 | 0.001 |
| SMU_416  | <i>trmB</i> | tRNA (guanine-N(7)-)-methyltransferase                                   | 0.539 | 0.262  | 0.381 | 0.000 |
| SMU_417  | -           | conserved hypothetical protein                                           | 0.719 | 0.049  | 0.006 | 0.001 |
| SMU_418  | <i>nusA</i> | transcription termination-antitermination factor NusA; elongation factor | 0.000 | 0.001  | 0.001 | 0.001 |
| SMU_419  | -           | conserved hypothetical protein                                           | 0.001 | 0.001  | 0.000 | 0.000 |
| SMU_42   | -           | conserved hypothetical protein                                           | 2.692 | 4.061  | 4.137 | 0.016 |

|          |              |                                                                                                               |       |       |       |       |
|----------|--------------|---------------------------------------------------------------------------------------------------------------|-------|-------|-------|-------|
| SMU_420  | -            | ribosomal protein L7A family                                                                                  | 0.112 | 0.002 | 0.000 | 0.000 |
| SMU_421  | <i>infB</i>  | translation initiation factor IF-2                                                                            | 0.000 | 0.000 | 0.000 | 0.000 |
| SMU_422  | <i>rbfA</i>  | ribosome binding factor A                                                                                     | 0.174 | 0.031 | 0.029 | 0.000 |
| SMU_423  | <i>nlmD</i>  | possible bacteriocin                                                                                          | 4.506 | 2.959 | 2.820 | 0.001 |
| SMU_424  | <i>copY</i>  | negative transcriptional regulator, CopY                                                                      | 2.348 | 1.314 | 1.268 | 0.000 |
| SMU_426  | <i>copA</i>  | copper-transporting ATPase                                                                                    | 1.314 | 1.177 | 1.126 | 0.001 |
| SMU_427  | <i>copZ</i>  | copper chaperone                                                                                              | 0.721 | 0.973 | 0.772 | 0.000 |
| SMU_428  | -            | conserved hypothetical protein, Cof family                                                                    | 1.902 | 2.289 | 2.092 | 0.045 |
| SMU_429c | -            | hypothetical protein                                                                                          | 2.389 | 3.094 | 2.463 | 0.484 |
| SMU_43   | -            | conserved hypothetical protein (possible site-specific DNA-methyltransferase/restriction modification enzyme) | 5.292 | 6.090 | 7.835 | 9.011 |
| SMU_431  | <i>cylA</i>  | ABC transporter, ATP-binding protein (hemolysin/cytolysin)                                                    | 1.466 | 2.047 | 2.167 | 0.001 |
| SMU_432  | <i>cylB</i>  | ABC transporter, permease and solute binding protein                                                          | 2.483 | 2.617 | 3.489 | 1.520 |
| SMU_433  | -            | transcriptional regulator                                                                                     | 1.895 | 1.861 | 1.870 | 0.000 |
| SMU_434  | -            | conserved hypothetical protein                                                                                | 0.783 | 0.014 | 0.015 | 0.000 |
| SMU_435  | <i>nagA</i>  | N-acetylglucosamine-6-phosphate deacetylase                                                                   | 2.445 | 2.454 | 2.088 | 4.877 |
| SMU_438c | -            | (R)-2-hydroxyglutaryl-CoA dehydratase activator-related protein                                               | 1.169 | 1.162 | 1.119 | 0.000 |
| SMU_439  | -            | transcriptional regulator                                                                                     | 1.481 | 1.071 | 1.284 | 0.001 |
| SMU_44   | -            | conserved hypothetical protein                                                                                | 3.319 | 3.721 | 4.877 | 0.001 |
| SMU_440  | -            | hypothetical protein                                                                                          | 1.236 | 1.105 | 1.268 | 0.002 |
| SMU_441  | -            | transcriptional regulator                                                                                     | 0.453 | 0.348 | 0.394 | 0.001 |
| SMU_442  | -            | conserved hypothetical protein                                                                                | 1.653 | 1.561 | 1.456 | 0.000 |
| SMU_444  | -            | hypothetical protein                                                                                          | 0.929 | 0.387 | 0.180 | 0.001 |
| SMU_445  | <i>sygA</i>  | glycyl-tRNA synthetase alpha subunit                                                                          | 0.000 | 0.001 | 0.000 | 0.000 |
| SMU_446  | <i>sygB</i>  | glycyl tRNA synthetase beta subunit                                                                           | 0.000 | 0.000 | 0.000 | 0.001 |
| SMU_447  | -            | conserved hypothetical protein                                                                                | 0.231 | 0.061 | 0.155 | 0.000 |
| SMU_448  | -            | conserved hypothetical protein                                                                                | 3.436 | 3.213 | 3.513 | 0.349 |
| SMU_449  | <i>proB</i>  | gamma-glutamyl kinase                                                                                         | 1.422 | 0.654 | 2.079 | 0.001 |
| SMU_45   | -            | hypothetical protein                                                                                          | 3.895 | 4.330 | 5.367 | 0.002 |
| SMU_450  | <i>proA</i>  | gamma-glutamyl phosphate reductase                                                                            | 3.174 | 0.541 | 2.676 | 0.001 |
| SMU_451  | -            | hypothetical protein                                                                                          | 0.908 | 1.284 | 1.686 | 0.000 |
| SMU_453  | <i>mraW</i>  | S-adenosyl-methyltransferase, MraW family                                                                     | 0.682 | 0.297 | 0.389 | 5.216 |
| SMU_454  | <i>ftsL</i>  | cell division protein                                                                                         | 0.404 | 0.225 | 0.002 | 0.030 |
| SMU_455  | <i>pbp2x</i> | penicillin-binding protein 2X                                                                                 | 0.001 | 0.001 | 0.000 | 0.001 |
| SMU_456  | <i>mraY</i>  | phospho-N-acetylmuramoyl-pentapeptide-transferase                                                             | 0.001 | 0.001 | 0.000 | 0.002 |
| SMU_457  | -            | hypothetical protein                                                                                          | 0.734 | 1.262 | 1.192 | 0.000 |
| SMU_458  | <i>rheB</i>  | ATP-dependent RNA helicase; DEAD/DEAH family                                                                  | 0.036 | 0.055 | 0.156 | 0.000 |
| SMU_459  | -            | amino acid ABC transporter, substrate-binding protein                                                         | 0.868 | 0.454 | 0.421 | 0.001 |

|                |              |                                                                       |        |        |        |        |
|----------------|--------------|-----------------------------------------------------------------------|--------|--------|--------|--------|
| <b>SMU_46</b>  | -            | hypothetical protein                                                  | 19.291 | 24.492 | 33.517 | 16.355 |
| <b>SMU_460</b> | -            | amino acid ABC transporter, permease                                  | 1.219  | 0.389  | 0.540  | 0.000  |
| <b>SMU_461</b> | -            | amino acid ABC transporter, ATP-binding protein                       | 0.601  | 0.218  | 0.296  | 0.000  |
| <b>SMU_462</b> | -            | Streptococcus-specific protein                                        | 2.576  | 1.551  | 0.481  | 0.001  |
| <b>SMU_463</b> | <i>trxB</i>  | thioredoxin reductase (NADPH)                                         | 0.017  | 0.000  | 0.001  | 0.004  |
| <b>SMU_464</b> | <i>pncB</i>  | nicotinate phosphoribosyltransferase                                  | 0.107  | 0.004  | 0.067  | 0.006  |
| <b>SMU_465</b> | <i>nadE</i>  | NAD(+) synthetase (nitrogen-regulatory protein)                       | 0.002  | 0.001  | 0.001  | 0.000  |
| <b>SMU_466</b> | <i>pepC</i>  | cysteine aminopeptidase C                                             | 0.843  | 0.619  | 0.736  | 0.071  |
| <b>SMU_467</b> | <i>pbp1a</i> | penicillin-binding protein 1a                                         | 0.064  | 0.010  | 0.011  | 0.001  |
| <b>SMU_469</b> | <i>recU</i>  | recombination protein U                                               | 0.611  | 0.021  | 0.014  | 0.034  |
| <b>SMU_47</b>  | -            | hypothetical protein                                                  | 12.828 | 16.566 | 23.924 | 1.113  |
| <b>SMU_470</b> | -            | conserved hypothetical protein                                        | 2.303  | 6.375  | 1.826  | 0.001  |
| <b>SMU_471</b> | -            | conserved hypothetical protein                                        | 0.001  | 0.000  | 0.001  | 0.000  |
| <b>SMU_472</b> | -            | conserved hypothetical protein, RNA methylase family                  | 1.526  | 3.010  | 1.236  | 0.000  |
| <b>SMU_473</b> | -            | conserved hypothetical protein                                        | 1.666  | 1.776  | 1.173  | 0.090  |
| <b>SMU_474</b> | <i>luxS</i>  | S-ribosylhomocysteine lyase (S-ribosylhomocysteinase)                 | 1.484  | 2.706  | 1.912  | 0.001  |
| <b>SMU_475</b> | -            | conserved hypothetical protein                                        | 1.018  | 0.006  | 0.000  | 0.000  |
| <b>SMU_478</b> | <i>kguA</i>  | guanylate kinase                                                      | 0.001  | 0.001  | 0.001  | 0.123  |
| <b>SMU_479</b> | <i>rpoZ</i>  | DNA-directed RNA polymerase, omega subunit                            | 0.373  | 0.143  | 0.122  | 0.003  |
| <b>SMU_48</b>  | <i>purD</i>  | phosphoribosylamine-glycine ligase                                    | 1.430  | 0.907  | 0.868  | 0.009  |
| <b>SMU_480</b> | <i>priA</i>  | primosomal replication factor Y (primosomal protein N')               | 0.368  | 0.003  | 0.002  | 0.010  |
| <b>SMU_481</b> | <i>fmt</i>   | methionyl-tRNA formyltransferase                                      | 0.001  | 0.000  | 0.003  | 0.003  |
| <b>SMU_482</b> | <i>sunL</i>  | RNA-binding Sun protein; possible rRNA methylase                      | 1.481  | 1.126  | 1.059  | 0.022  |
| <b>SMU_483</b> | <i>pppL</i>  | phosphoprotein phosphatase (pppL protein)                             | 0.624  | 0.003  | 0.000  | 0.001  |
| <b>SMU_484</b> | <i>pknB</i>  | serine/threonine protein kinase                                       | 1.493  | 0.046  | 0.036  | 0.002  |
| <b>SMU_485</b> | <i>liaF</i>  | conserved hypothetical protein                                        | 3.073  | 1.523  | 3.772  | 0.220  |
| <b>SMU_486</b> | <i>liaS</i>  | two-component sensor histidine kinase                                 | 2.228  | 0.745  | 4.123  | 0.000  |
| <b>SMU_487</b> | <i>liaR</i>  | two-component response regulator                                      | 0.968  | 0.841  | 3.107  | 0.001  |
| <b>SMU_488</b> | <i>ppiB</i>  | hydrolase; possible peptidyl-prolyl cis-trans isomerase               | 2.792  | 1.175  | 2.766  | 0.003  |
| <b>SMU_489</b> | <i>pnpB</i>  | polyribonucleotide nucleotidyltransferase (general stress protein 13) | 1.627  | 0.371  | 0.425  | 0.000  |
| <b>SMU_49</b>  | -            | hypothetical protein                                                  | 1.127  | 0.938  | 0.629  | 0.001  |
| <b>SMU_490</b> | <i>pfIC</i>  | pyruvate formate-lyase activating enzyme                              | 1.418  | 1.576  | 1.390  | 0.001  |
| <b>SMU_491</b> | -            | transcriptional regulator, DeoR family                                | 2.055  | 1.808  | 2.779  | 0.001  |
| <b>SMU_493</b> | <i>pfI2</i>  | formate acetyltransferase (pyruvate-formate lyase)                    | 2.539  | 2.237  | 2.312  | 0.000  |

|                 |                         |                                                                                      |       |       |       |       |
|-----------------|-------------------------|--------------------------------------------------------------------------------------|-------|-------|-------|-------|
| <b>SMU_494</b>  | <i>mipB</i>             | transaldolase family protein                                                         | 0.756 | 0.542 | 0.397 | 0.001 |
| <b>SMU_495</b>  | <i>gldA</i>             | glycerol dehydrogenase                                                               | 1.386 | 1.681 | 1.751 | 0.000 |
| <b>SMU_496</b>  | <i>cysK</i>             | cysteine synthetase A                                                                | 1.230 | 0.854 | 0.979 | 0.000 |
| <b>SMU_497c</b> | -                       | conserved hypothetical protein                                                       | 2.390 | 2.167 | 1.796 | 0.000 |
| <b>SMU_498</b>  | <i>comF</i><br><i>A</i> | late competence protein F                                                            | 0.927 | 0.799 | 0.726 | 0.001 |
| <b>SMU_499</b>  | <i>comF</i><br><i>C</i> | late competence protein required for DNA uptake                                      | 3.801 | 3.261 | 3.309 | 0.001 |
| <b>SMU_50</b>   | <i>purE</i>             | phosphoribosylaminoimidazole carboxylase catalytic subunit                           | 0.885 | 0.693 | 0.472 | 0.000 |
| <b>SMU_500</b>  | <i>yfiA</i>             | ribosome-associated protein                                                          | 4.307 | 9.055 | 4.912 | 0.719 |
| <b>SMU_501</b>  | -                       | hypothetical protein                                                                 | 1.986 | 2.099 | 1.893 | 0.129 |
| <b>SMU_502</b>  | -                       | conserved hypothetical protein                                                       | 2.602 | 2.677 | 2.638 | 0.001 |
| <b>SMU_503c</b> | -                       | hypothetical protein                                                                 | 1.578 | 1.171 | 1.374 | 0.990 |
| <b>SMU_504</b>  | <i>dam</i>              | site-specific DNA-adenine methyltransferase                                          | 2.397 | 1.528 | 1.619 | 0.004 |
| <b>SMU_505</b>  | <i>dpn</i>              | adenine-specific DNA methylase (DpnIIb)                                              | 3.236 | 3.362 | 3.802 | 0.001 |
| <b>SMU_506</b>  | <i>ssuRB</i>            | type II restriction endonuclease                                                     | 1.015 | 1.222 | 1.346 | 0.007 |
| <b>SMU_507</b>  | <i>glcR</i>             | transcriptional regulator, DeoR family                                               | 0.595 | 0.730 | 0.814 | 0.008 |
| <b>SMU_508</b>  | -                       | conserved hypothetical protein (possible hydrolase)                                  | 0.731 | 0.633 | 0.592 | 0.013 |
| <b>SMU_509</b>  | -                       | conserved hypothetical protein                                                       | 1.346 | 1.377 | 1.371 | 0.021 |
| <b>SMU_51</b>   | <i>purK</i>             | phosphoribosylaminoimidazole carboxylase, ATPase subunit                             | 1.104 | 0.836 | 0.485 | 0.001 |
| <b>SMU_510c</b> | -                       | deoxyribonuclease                                                                    | 1.263 | 1.514 | 1.358 | 0.241 |
| <b>SMU_512c</b> | -                       | conserved hypothetical protein                                                       | 3.842 | 1.967 | 2.041 | 0.001 |
| <b>SMU_513</b>  | -                       | hypothetical protein                                                                 | 4.316 | 6.151 | 5.283 | 0.000 |
| <b>SMU_514</b>  | -                       | transcriptional regulator, AcrR family                                               | 1.193 | 1.398 | 1.163 | 0.002 |
| <b>SMU_515</b>  | <i>mycA</i>             | 67 kDa myosin-crossreactive antigen                                                  | 1.457 | 1.541 | 1.479 | 0.004 |
| <b>SMU_516</b>  | -                       | conserved hypothetical protein, N6 adenine-specific DNA methylase signature domain   | 0.821 | 0.300 | 0.236 | 0.038 |
| <b>SMU_517</b>  | <i>coaD</i>             | phosphopantetheine adenylyltransferase; lipopolysaccharide core biosynthesis protein | 0.000 | 0.000 | 0.002 | 0.002 |
| <b>SMU_518</b>  | -                       | conserved hypothetical protein                                                       | 1.945 | 1.863 | 1.476 | 0.002 |
| <b>SMU_52</b>   | -                       | conserved hypothetical protein                                                       | 2.297 | 1.571 | 1.898 | 0.001 |
| <b>SMU_520</b>  | -                       | phosphodiesterase-related protein                                                    | 1.462 | 1.405 | 1.044 | 0.001 |
| <b>SMU_521</b>  | -                       | conserved hypothetical protein                                                       | 1.690 | 1.920 | 1.595 | 0.016 |
| <b>SMU_522</b>  | -                       | conserved hypothetical protein                                                       | 1.481 | 2.256 | 1.891 | 0.000 |
| <b>SMU_523</b>  | -                       | conserved hypothetical protein, VanZ-like family                                     | 3.535 | 3.874 | 3.344 | 0.008 |
| <b>SMU_524</b>  | -                       | ABC transporter ATP-binding / permease protein                                       | 2.112 | 2.477 | 1.756 | 0.032 |
| <b>SMU_525</b>  | -                       | ABC transporter ATP-binding / permease protein                                       | 2.280 | 2.693 | 2.606 | 0.002 |
| <b>SMU_526c</b> | -                       | transcriptional regulator                                                            | 3.436 | 4.035 | 4.038 | 0.097 |
| <b>SMU_527</b>  | -                       | conserved hypothetical protein                                                       | 1.601 | 1.700 | 1.773 | 0.000 |

|                 |               |                                                                                     |       |       |       |       |
|-----------------|---------------|-------------------------------------------------------------------------------------|-------|-------|-------|-------|
| <b>SMU_528c</b> | -             | conserved hypothetical protein                                                      | 1.828 | 1.704 | 0.993 | 0.135 |
| <b>SMU_529</b>  | -             | hypothetical protein                                                                | 1.995 | 1.061 | 0.759 | 0.032 |
| <b>SMU_53</b>   | -             | conserved hypothetical protein                                                      | 1.510 | 2.369 | 2.270 | 0.001 |
| <b>SMU_530c</b> | -             | conserved hypothetical protein                                                      | 1.965 | 2.353 | 2.577 | 1.303 |
| <b>SMU_531</b>  | <i>pheA</i>   | chorismate mutase; possible prephenate dehydrogenase                                | 0.708 | 0.886 | 0.716 | 0.000 |
| <b>SMU_532</b>  | <i>trpE</i>   | anthranilate synthase, component I                                                  | 0.844 | 0.970 | 0.818 | 0.001 |
| <b>SMU_533</b>  | <i>trpG</i>   | anthranilate synthase, component II                                                 | 1.004 | 0.721 | 0.797 | 0.334 |
| <b>SMU_534</b>  | <i>trpD</i>   | phosphoribosyl anthranilate transferase                                             | 1.172 | 1.237 | 0.992 | 0.000 |
| <b>SMU_535</b>  | <i>trpC</i>   | indole-3-glycerol phosphate synthase                                                | 1.102 | 1.165 | 1.219 | 0.001 |
| <b>SMU_536</b>  | <i>trpF</i>   | phosphoribosylanthranilate isomerase                                                | 1.274 | 1.162 | 0.945 | 0.000 |
| <b>SMU_537</b>  | <i>trpB</i>   | tryptophan synthase, beta subunit                                                   | 0.714 | 0.770 | 0.630 | 0.105 |
| <b>SMU_538</b>  | <i>trpA</i>   | tryptophan synthase, alpha subunit                                                  | 1.041 | 1.209 | 1.108 | 0.001 |
| <b>SMU_539c</b> | <i>comC</i>   | prepilin peptidase type IV                                                          | 1.914 | 2.131 | 4.187 | 0.001 |
| <b>SMU_54</b>   | -             | amino acid racemase                                                                 | 0.983 | 0.949 | 0.912 | 0.000 |
| <b>SMU_540</b>  | <i>dpr</i>    | peroxide resistance protein / iron binding protein                                  | 3.169 | 0.470 | 0.143 | 0.000 |
| <b>SMU_541</b>  | -             | conserved hypothetical protein                                                      | 4.747 | 2.691 | 2.404 | 0.000 |
| <b>SMU_542</b>  | <i>glk</i>    | glucose kinase                                                                      | 0.885 | 0.460 | 0.713 | 0.008 |
| <b>SMU_543</b>  | -             | conserved hypothetical protein                                                      | 1.893 | 1.570 | 1.688 | 0.002 |
| <b>SMU_545</b>  | -             | hypothetical protein                                                                | 1.472 | 1.831 | 2.226 | 0.540 |
| <b>SMU_546</b>  | <i>bipA</i>   | GTP-binding protein (tyrosine phosphorylated protein A); possible elongation factor | 0.951 | 0.281 | 0.171 | 0.000 |
| <b>SMU_547</b>  | -             | conserved hypothetical protein                                                      | 0.942 | 2.095 | 0.197 | 0.000 |
| <b>SMU_548</b>  | <i>murD</i>   | D-glutamic acid adding enzyme MurD; UDP-N-acetylmuramoylalanine--D-glutamate ligase | 0.001 | 0.000 | 0.001 | 1.103 |
| <b>SMU_549</b>  | <i>murG</i>   | undecaprenyl-PP-MurNAc-pentapeptide-UDPGlcNAc GlcNAc transferase                    | 0.023 | 0.007 | 0.016 | 0.002 |
| <b>SMU_55</b>   | -             | hypothetical protein                                                                | 5.695 | 4.958 | 5.816 | 0.001 |
| <b>SMU_550</b>  | <i>divIB</i>  | cell division protein                                                               | 1.026 | 1.368 | 0.093 | 0.008 |
| <b>SMU_551</b>  | <i>ftsA</i>   | cell division protein FtsA                                                          | 0.000 | 0.000 | 0.000 | 0.001 |
| <b>SMU_552</b>  | <i>ftsZ</i>   | cell division protein FtsZ                                                          | 3.707 | 0.000 | 0.000 | 0.002 |
| <b>SMU_553</b>  | <i>ylmE</i>   | conserved hypothetical protein                                                      | 0.174 | 0.130 | 0.112 | 0.003 |
| <b>SMU_554</b>  | <i>ylmF</i>   | conserved hypothetical protein                                                      | 1.256 | 0.256 | 0.250 | 0.000 |
| <b>SMU_555</b>  | <i>ylmG</i>   | conserved hypothetical protein                                                      | 0.925 | 0.812 | 0.552 | 0.004 |
| <b>SMU_556</b>  | <i>ylmH</i>   | conserved hypothetical protein                                                      | 0.241 | 0.277 | 0.169 | 0.001 |
| <b>SMU_557</b>  | <i>divIVA</i> | cell division initiation protein                                                    | 0.245 | 0.226 | 0.039 | 0.000 |
| <b>SMU_558</b>  | <i>ileS</i>   | isoleucine-tRNA synthetase                                                          | 0.008 | 0.001 | 0.003 | 0.003 |
| <b>SMU_56</b>   | -             | Streptococcus-specific protein                                                      | 1.842 | 2.482 | 3.065 | 0.001 |
| <b>SMU_560c</b> | -             | conserved hypothetical protein                                                      | 2.775 | 1.603 | 0.227 | 0.001 |
| <b>SMU_561c</b> | <i>mutT</i>   | mutator protein, Nudix hydrolase, MutT family                                       | 0.997 | 1.084 | 0.818 | 0.000 |
| <b>SMU_562</b>  | <i>clpE</i>   | ATP-dependent protease ClpE                                                         | 0.810 | 0.734 | 0.780 | 2.323 |

|                 |              |                                                                                                               |       |       |       |       |
|-----------------|--------------|---------------------------------------------------------------------------------------------------------------|-------|-------|-------|-------|
| <b>SMU_563</b>  | -            | ornithine carbamoyltransferase                                                                                | 0.657 | 0.728 | 0.616 | 0.002 |
| <b>SMU_564</b>  | -            | conserved hypothetical protein                                                                                | 0.331 | 0.245 | 0.182 | 0.000 |
| <b>SMU_567</b>  | <i>glnP</i>  | amino acid (glutamine) ABC transporter permease                                                               | 1.042 | 0.010 | 0.283 | 0.003 |
| <b>SMU_568</b>  | <i>glnQ</i>  | glutamine ABC transporter, ATP-binding protein                                                                | 0.936 | 0.027 | 0.428 | 0.007 |
| <b>SMU_569</b>  | <i>feoA</i>  | ferrous ion transport protein A                                                                               | 0.927 | 1.222 | 1.308 | 0.000 |
| <b>SMU_570</b>  | <i>feoB</i>  | ferrous ion transport protein B                                                                               | 0.926 | 1.035 | 0.870 | 0.377 |
| <b>SMU_571</b>  | -            | hypothetical protein                                                                                          | 1.350 | 1.353 | 1.001 | 0.001 |
| <b>SMU_572</b>  | <i>folD</i>  | bifunctional protein:<br>methylenetetrahydrofolate dehydrogenase /<br>methenyltetrahydrofolate cyclohydrolase | 1.390 | 0.048 | 0.000 | 0.008 |
| <b>SMU_573</b>  | -            | conserved hypothetical protein                                                                                | 0.929 | 1.102 | 0.697 | 0.002 |
| <b>SMU_574c</b> | <i>lrg</i>   | effector of murein hydrolase                                                                                  | 0.995 | 1.699 | 1.716 | 0.006 |
| <b>SMU_575c</b> | <i>lrgA</i>  | murein hydrolase regulator                                                                                    | 1.744 | 2.404 | 2.221 | 0.047 |
| <b>SMU_576</b>  | <i>lytT</i>  | response regulator                                                                                            | 0.913 | 1.444 | 1.655 | 0.000 |
| <b>SMU_577</b>  | <i>lytS</i>  | sensor histidine kinase                                                                                       | 1.220 | 1.454 | 1.531 | 0.281 |
| <b>SMU_58</b>   | -            | hypothetical protein                                                                                          | 4.821 | 6.932 | 8.899 | 0.003 |
| <b>SMU_580</b>  | <i>xseA</i>  | exodeoxyribonuclease VII, large subunit                                                                       | 0.639 | 0.223 | 0.292 | 0.000 |
| <b>SMU_581</b>  | <i>xseB</i>  | exodeoxyribonuclease VII, small subunit                                                                       | 0.156 | 0.332 | 0.283 | 0.000 |
| <b>SMU_582</b>  | <i>fps</i>   | farnesyl diphosphate synthase (geranyltranstransferase)                                                       | 0.910 | 0.515 | 0.030 | 0.000 |
| <b>SMU_583</b>  | <i>hlyX</i>  | probable hemolysin A                                                                                          | 0.170 | 0.062 | 0.120 | 0.000 |
| <b>SMU_584</b>  | <i>argR</i>  | arginine repressor                                                                                            | 0.019 | 0.000 | 0.000 | 0.001 |
| <b>SMU_585</b>  | <i>recN</i>  | DNA repair and genetic recombination protein                                                                  | 1.195 | 0.558 | 0.660 | 0.001 |
| <b>SMU_586</b>  | -            | conserved hypothetical protein, DevG family                                                                   | 0.956 | 0.687 | 0.886 | 0.000 |
| <b>SMU_587</b>  | -            | lipase/acylhydrolase with GDSL-like domain                                                                    | 1.182 | 0.858 | 1.017 | 0.003 |
| <b>SMU_588</b>  | -            | conserved hypothetical protein                                                                                | 1.638 | 1.446 | 1.592 | 0.000 |
| <b>SMU_589</b>  | <i>hlpA</i>  | histone-like DNA-binding protein                                                                              | 0.001 | 0.000 | 0.000 | 0.002 |
| <b>SMU_59</b>   | <i>purB</i>  | adenylosuccinate lyase                                                                                        | 0.362 | 0.000 | 0.163 | 0.000 |
| <b>SMU_590c</b> | -            | transposase fragment                                                                                          | 0.081 | 0.048 | 0.030 | 0.000 |
| <b>SMU_591c</b> | -            | conserved hypothetical protein                                                                                | 4.014 | 5.529 | 4.337 | 0.002 |
| <b>SMU_592c</b> | -            | transcriptional regulator                                                                                     | 2.700 | 4.453 | 2.701 | 0.004 |
| <b>SMU_593</b>  | <i>furR</i>  | ferric uptake regulator protein FurR                                                                          | 2.351 | 2.998 | 1.649 | 0.002 |
| <b>SMU_594</b>  | -            | hypothetical protein                                                                                          | 2.172 | 3.148 | 1.654 | 0.001 |
| <b>SMU_595</b>  | <i>pyrD</i>  | dihydroorotate dehydrogenase (dihydroorotate oxidase)                                                         | 1.588 | 1.708 | 1.438 | 0.000 |
| <b>SMU_596</b>  | <i>pmgY</i>  | phosphoglycerate mutase                                                                                       | 0.000 | 0.000 | 0.000 | 0.000 |
| <b>SMU_597</b>  | <i>pbp2b</i> | penicillin-binding protein 2b                                                                                 | 1.849 | 5.755 | 7.674 | 0.011 |
| <b>SMU_598</b>  | <i>recM</i>  | recombination protein                                                                                         | 0.653 | 0.059 | 0.042 | 0.000 |
| <b>SMU_599</b>  | <i>ddlA</i>  | D-alanine-D-alanine ligase                                                                                    | 0.029 | 0.042 | 0.049 | 0.005 |
| <b>SMU_60</b>   | <i>alkD</i>  | DNA alkylation repair enzyme                                                                                  | 2.203 | 1.061 | 2.134 | 0.000 |
| <b>SMU_600c</b> | -            | conserved hypothetical protein                                                                                | 1.905 | 1.747 | 1.486 | 0.001 |
| <b>SMU_602</b>  | -            | sodium-dependent transporter                                                                                  | 1.762 | 1.713 | 1.673 | 0.003 |

|                 |                         |                                                                                                                                                           |       |       |       |         |
|-----------------|-------------------------|-----------------------------------------------------------------------------------------------------------------------------------------------------------|-------|-------|-------|---------|
| <b>SMU_603</b>  | <i>murF</i>             | D-Ala-D-Ala adding enzyme; UDP-N-acetylmuramoylalanyl-D-glutamyl-2,6-diaminopimelate-D-alanyl-D-alanyl ligase (UDP-N-acetylmuramyl pentapeptide synthase) | 0.001 | 0.001 | 0.000 | 0.001   |
| <b>SMU_604</b>  | <i>yddK</i>             | conserved hypothetical protein                                                                                                                            | 3.923 | 4.291 | 1.850 | 0.012   |
| <b>SMU_605</b>  | -                       | hypothetical protein                                                                                                                                      | 3.032 | 6.228 | 2.556 | 0.002   |
| <b>SMU_606</b>  | -                       | hypothetical protein                                                                                                                                      | 2.337 | 4.971 | 3.125 | 0.164   |
| <b>SMU_607</b>  | -                       | conserved hypothetical protein                                                                                                                            | 3.342 | 4.994 | 4.397 | 0.005   |
| <b>SMU_608</b>  | <i>prfC</i>             | peptide chain release factor 3 ; translation elongation and release factor                                                                                | 1.369 | 0.668 | 1.061 | 0.020   |
| <b>SMU_609</b>  | <i>bsp</i>              | cell wall protein precursor                                                                                                                               | 0.507 | 0.509 | 0.565 | 0.001   |
| <b>SMU_61</b>   | <i>comR</i>             | transcriptional regulator, Cro/C1 family                                                                                                                  | 2.456 | 2.809 | 4.336 | 380.442 |
| <b>SMU_610</b>  | <i>spaP</i>             | cell surface antigen                                                                                                                                      | 0.885 | 1.082 | 1.139 | 0.326   |
| <b>SMU_611</b>  | <i>deaD</i>             | ATP-dependent RNA helicase/DEAD family                                                                                                                    | 0.407 | 0.029 | 0.117 | 0.004   |
| <b>SMU_613</b>  | -                       | hypothetical protein                                                                                                                                      | 1.902 | 1.050 | 1.570 | 0.001   |
| <b>SMU_614</b>  | -                       | hypothetical protein                                                                                                                                      | 0.650 | 0.482 | 0.904 | 0.002   |
| <b>SMU_616</b>  | -                       | hypothetical protein                                                                                                                                      | 1.771 | 3.128 | 4.427 | 0.000   |
| <b>SMU_618</b>  | -                       | hypothetical protein                                                                                                                                      | 0.985 | 0.152 | 0.211 | 0.002   |
| <b>SMU_620</b>  | -                       | hypothetical protein                                                                                                                                      | 1.415 | 1.412 | 1.929 | 0.001   |
| <b>SMU_621c</b> | -                       | conserved hypothetical protein                                                                                                                            | 1.565 | 1.285 | 1.894 | 0.012   |
| <b>SMU_622c</b> | -                       | conserved hypothetical protein                                                                                                                            | 0.828 | 1.168 | 1.208 | 0.000   |
| <b>SMU_623c</b> | <i>yheN</i>             | polysaccharide deacetylase                                                                                                                                | 1.336 | 1.283 | 1.551 | 0.001   |
| <b>SMU_624</b>  | <i>plsC</i>             | 1-acylglycerol-3-phosphate O-acyltransferase                                                                                                              | 0.011 | 0.001 | 0.000 | 0.002   |
| <b>SMU_625</b>  | <i>comE</i><br><i>A</i> | competence protein                                                                                                                                        | 1.120 | 0.913 | 1.678 | 0.001   |
| <b>SMU_626</b>  | <i>comE</i><br><i>C</i> | competence protein; possible integral membrane protein                                                                                                    | 0.616 | 0.467 | 0.695 | 0.003   |
| <b>SMU_627</b>  | -                       | conserved hypothetical protein                                                                                                                            | 0.551 | 0.934 | 1.306 | 0.077   |
| <b>SMU_628</b>  | <i>holA</i>             | DNA polymerase III, delta subunit                                                                                                                         | 0.001 | 0.001 | 0.000 | 0.003   |
| <b>SMU_629</b>  | <i>sodA</i>             | superoxide dismutase                                                                                                                                      | 0.001 | 0.000 | 0.000 | 0.000   |
| <b>SMU_630</b>  | -                       | conserved hypothetical protein                                                                                                                            | 2.342 | 2.509 | 3.770 | 0.001   |
| <b>SMU_631</b>  | -                       | conserved hypothetical protein                                                                                                                            | 1.410 | 1.125 | 1.784 | 0.222   |
| <b>SMU_632</b>  | -                       | transcriptional regulator                                                                                                                                 | 0.504 | 0.720 | 0.613 | 0.000   |
| <b>SMU_633</b>  | <i>tesA</i>             | thioesterase                                                                                                                                              | 1.294 | 1.226 | 1.486 | 0.002   |
| <b>SMU_634</b>  | <i>queA</i>             | S-adenosylmethionine--tRNA ribosyltransferase-isomerase (queuosine (Q) biosynthesis protein)                                                              | 0.763 | 0.665 | 0.797 | 1.112   |
| <b>SMU_635</b>  | -                       | conserved hypothetical protein                                                                                                                            | 0.453 | 0.332 | 0.721 | 0.004   |
| <b>SMU_636</b>  | <i>nagB</i>             | glucosamine-6-phosphate isomerase                                                                                                                         | 0.685 | 0.725 | 0.865 | 0.000   |
| <b>SMU_637c</b> | -                       | hypothetical protein                                                                                                                                      | 0.976 | 1.050 | 1.274 | 0.001   |
| <b>SMU_638</b>  | <i>rsuA</i>             | ribosomal small subunit pseudouridine synthase A                                                                                                          | 0.907 | 0.819 | 1.232 | 0.001   |
| <b>SMU_639</b>  | <i>rimJ</i>             | N-terminal acetyltransferase                                                                                                                              | 2.018 | 2.732 | 2.948 | 0.000   |
| <b>SMU_63c</b>  | -                       | conserved hypothetical protein                                                                                                                            | 1.687 | 2.085 | 2.125 | 0.239   |
| <b>SMU_64</b>   | <i>ruvB</i>             | Holliday junction DNA helicase                                                                                                                            | 0.412 | 0.013 | 0.013 | 0.001   |



|                 |              |                                                                                                   |       |       |       |       |
|-----------------|--------------|---------------------------------------------------------------------------------------------------|-------|-------|-------|-------|
| <b>SMU_640c</b> | <i>ydeF</i>  | transcriptional regulator                                                                         | 1.312 | 1.318 | 1.406 | 0.220 |
| <b>SMU_641</b>  | <i>qor</i>   | oxidoreductase                                                                                    | 1.512 | 1.297 | 1.062 | 0.160 |
| <b>SMU_642</b>  | -            | hypothetical protein                                                                              | 1.658 | 2.300 | 2.944 | 0.000 |
| <b>SMU_643</b>  | <i>yeeB</i>  | acetyl esterase/ sugar hydrolase                                                                  | 2.322 | 2.628 | 2.886 | 0.001 |
| <b>SMU_644</b>  | <i>coiA</i>  | competence protein CoiA                                                                           | 0.926 | 1.041 | 1.228 | 0.002 |
| <b>SMU_645</b>  | <i>pepB</i>  | PepB oligopeptidase                                                                               | 0.941 | 1.029 | 1.052 | 0.000 |
| <b>SMU_646</b>  | <i>gph</i>   | hydrolase (possible phosphoglycolate phosphatase)                                                 | 2.536 | 2.623 | 2.606 | 1.032 |
| <b>SMU_647</b>  | -            | O-methyltransferase                                                                               | 0.707 | 0.603 | 3.507 | 0.745 |
| <b>SMU_648</b>  | <i>prtM</i>  | protease maturation protein; possible peptidylprolyl isomerase                                    | 1.195 | 1.741 | 1.045 | 0.000 |
| <b>SMU_649</b>  | -            | conserved hypothetical protein                                                                    | 0.932 | 0.891 | 1.209 | 0.000 |
| <b>SMU_65</b>   | <i>ptp</i>   | protein tyrosine-phosphatase                                                                      | 1.381 | 1.232 | 0.601 | 0.000 |
| <b>SMU_650</b>  | <i>alaS</i>  | alanyl-tRNA synthetase (alanine--tRNA ligase)                                                     | 0.000 | 0.000 | 0.000 | 0.001 |
| <b>SMU_651c</b> | -            | ABC transporter, periplasmic substrate-binding protein                                            | 1.250 | 1.286 | 1.473 | 0.004 |
| <b>SMU_652c</b> | <i>msmK</i>  | ABC transporter, ATP-binding protein (possible nitrate transport system)                          | 1.560 | 1.510 | 1.664 | 0.001 |
| <b>SMU_653c</b> | <i>tauC</i>  | ABC transporter, permease protein (possible taurine transport system permease)                    | 0.717 | 0.739 | 0.774 | 0.022 |
| <b>SMU_654</b>  | <i>mutF</i>  | ABC transporter, ATP-binding protein                                                              | 1.075 | 1.199 | 1.649 | 0.000 |
| <b>SMU_655</b>  | <i>mutE1</i> | mutE like protein, possibly bacteriocin associated                                                | 1.037 | 1.390 | 1.483 | 0.000 |
| <b>SMU_656</b>  | <i>mutE2</i> | ABC transporter, permease, possibly bacteriocin associated                                        | 0.972 | 0.892 | 1.456 | 0.001 |
| <b>SMU_657</b>  | <i>mutG</i>  | ABC transporter, permease, possibly bacteriocin associated                                        | 0.845 | 0.920 | 0.992 | 0.003 |
| <b>SMU_658</b>  | -            | conserved hypothetical protein                                                                    | 1.185 | 1.470 | 1.476 | 0.021 |
| <b>SMU_659</b>  | <i>spaR</i>  | response regulator                                                                                | 0.903 | 0.987 | 0.989 | 0.007 |
| <b>SMU_66</b>   | -            | conserved hypothetical protein; possible phosphatidylinositol-4-phosphate 5-kinase                | 3.134 | 2.239 | 1.785 | 0.001 |
| <b>SMU_660</b>  | <i>spaK</i>  | histidine kinase                                                                                  | 0.636 | 0.906 | 0.946 | 0.001 |
| <b>SMU_661</b>  | -            | transcriptional regulator                                                                         | 1.651 | 1.914 | 4.062 | 1.955 |
| <b>SMU_662</b>  | -            | conserved hypothetical protein (possible membrane protein)                                        | 2.579 | 4.044 | 4.256 | 0.001 |
| <b>SMU_663</b>  | <i>argC</i>  | N-acetyl-gamma-glutamyl-phosphate reductase (N-acetyl-glutamate-gamma-semialdehyde dehydrogenase) | 1.817 | 1.745 | 1.581 | 0.010 |
| <b>SMU_664</b>  | <i>argJ</i>  | ornithine acetyltransferase / N-acetylglutamate synthase                                          | 1.025 | 0.999 | 0.812 | 0.002 |
| <b>SMU_665</b>  | <i>argB</i>  | acetylglutamate kinase                                                                            | 1.390 | 1.232 | 1.018 | 0.001 |
| <b>SMU_666</b>  | <i>argD</i>  | N-acetylornithine aminotransferase                                                                | 1.760 | 1.149 | 1.294 | 0.203 |
| <b>SMU_667</b>  | <i>nrdG</i>  | ribonucleotide reductase, small subunit                                                           | 0.000 | 0.000 | 0.000 | 0.001 |
| <b>SMU_668c</b> | <i>nrdA</i>  | ribonucleotide reductase, large subunit                                                           | 0.000 | 0.000 | 0.000 | 0.002 |
| <b>SMU_669c</b> | <i>nrdH</i>  | glutaredoxin                                                                                      | 0.601 | 0.100 | 0.162 | 0.001 |

|                 |             |                                                                             |       |       |       |       |
|-----------------|-------------|-----------------------------------------------------------------------------|-------|-------|-------|-------|
| <b>SMU_67</b>   | -           | acyltransferase                                                             | 2.105 | 2.447 | 2.724 | 0.318 |
| <b>SMU_670</b>  | <i>citB</i> | aconitate hydratase; aconitase A                                            | 1.007 | 1.002 | 1.169 | 0.002 |
| <b>SMU_671</b>  | <i>citZ</i> | citrate synthase                                                            | 1.492 | 1.269 | 1.418 | 0.000 |
| <b>SMU_672</b>  | <i>idh</i>  | isocitrate dehydrogenase                                                    | 0.788 | 0.826 | 0.955 | 0.000 |
| <b>SMU_673</b>  | -           | conserved hypothetical protein                                              | 1.000 | 0.929 | 1.209 | 0.001 |
| <b>SMU_674</b>  | <i>ptsH</i> | phosphotransferase system phosphohistidine-containing protein               | 0.016 | 0.002 | 0.001 | 0.000 |
| <b>SMU_675</b>  | <i>ptsI</i> | phosphoenolpyruvate-protein phosphotransferase (enzyme I)                   | 0.000 | 0.000 | 0.000 | 0.035 |
| <b>SMU_676</b>  | <i>gapN</i> | NADP-dependent non-phosphorylating glyceraldehyde-3-phosphate dehydrogenase | 0.099 | 0.001 | 0.000 | 0.000 |
| <b>SMU_677</b>  | <i>rmeA</i> | transcriptional regulator, MerR family                                      | 1.210 | 0.775 | 0.386 | 0.032 |
| <b>SMU_678</b>  | <i>ycgG</i> | oxidoreductase, aldo/keto reductase family                                  | 2.458 | 1.969 | 1.637 | 0.070 |
| <b>SMU_679</b>  | <i>ycgG</i> | oxidoreductase, aldo/keto reductase family                                  | 1.562 | 1.845 | 1.008 | 0.001 |
| <b>SMU_680</b>  | -           | carboxymuconolactone decarboxylase family protein                           | 2.667 | 2.092 | 1.902 | 0.001 |
| <b>SMU_681</b>  | -           | conserved hypothetical protein                                              | 2.220 | 2.040 | 2.707 | 0.000 |
| <b>SMU_682</b>  | -           | hypothetical protein                                                        | 2.959 | 3.031 | 3.414 | 0.102 |
| <b>SMU_683</b>  | -           | conserved hypothetical protein                                              | 1.918 | 2.085 | 2.242 | 0.040 |
| <b>SMU_684</b>  | -           | hypothetical protein                                                        | 1.636 | 1.782 | 3.433 | 0.000 |
| <b>SMU_685</b>  | -           | hypothetical protein                                                        | 2.118 | 1.862 | 1.755 | 0.003 |
| <b>SMU_687c</b> | -           | hypothetical protein                                                        | 1.184 | 1.549 | 1.623 | 0.000 |
| <b>SMU_688</b>  | -           | conserved hypothetical protein                                              | 1.628 | 2.216 | 2.366 | 0.002 |
| <b>SMU_689</b>  | <i>atlA</i> | autolysin/endolysin                                                         | 2.406 | 2.507 | 2.760 | 0.275 |
| <b>SMU_690</b>  | -           | hypothetical protein                                                        | 0.906 | 1.121 | 0.908 | 0.000 |
| <b>SMU_691</b>  | <i>pepT</i> | peptidase T (tripeptidase)                                                  | 1.631 | 2.097 | 1.886 | 0.145 |
| <b>SMU_692</b>  | <i>thmA</i> | possible pore-forming peptide                                               | 1.084 | 0.221 | 0.152 | 0.002 |
| <b>SMU_694c</b> | <i>fer</i>  | ferredoxin                                                                  | 1.474 | 1.271 | 0.985 | 0.000 |
| <b>SMU_695</b>  | -           | conserved hypothetical protein                                              | 2.104 | 2.052 | 1.298 | 0.001 |
| <b>SMU_696</b>  | <i>cmk</i>  | cytidylate kinase                                                           | 0.239 | 0.001 | 0.005 | 0.001 |
| <b>SMU_697</b>  | <i>infC</i> | translation initiation factor IF-3                                          | 0.000 | 0.000 | 0.000 | 0.000 |
| <b>SMU_698</b>  | <i>rpml</i> | 50S ribosomal protein L35                                                   | 0.256 | 0.118 | 0.200 | 0.001 |
| <b>SMU_699</b>  | <i>rplT</i> | 50S ribosomal protein L20                                                   | 0.001 | 0.000 | 0.001 | 0.000 |
| <b>SMU_70</b>   | <i>thrC</i> | threonine synthase                                                          | 0.006 | 0.002 | 0.000 | 0.521 |
| <b>SMU_700c</b> | <i>gpmB</i> | phosphoglycerate mutase                                                     | 1.515 | 2.351 | 1.868 | 0.000 |
| <b>SMU_701c</b> | -           | integral membrane protein                                                   | 2.641 | 3.232 | 2.653 | 0.274 |
| <b>SMU_702c</b> | <i>ydbF</i> | transcriptional regulator                                                   | 0.886 | 3.402 | 2.205 | 0.000 |
| <b>SMU_703c</b> | -           | conserved hypothetical protein                                              | 1.443 | 1.357 | 1.399 | 0.001 |
| <b>SMU_704c</b> | -           | autolysin                                                                   | 1.749 | 1.682 | 1.907 | 0.000 |
| <b>SMU_706c</b> | -           | conserved hypothetical protein                                              | 0.764 | 0.492 | 0.557 | 0.003 |
| <b>SMU_707c</b> | -           | endolysin                                                                   | 0.846 | 0.746 | 1.604 | 0.001 |
| <b>SMU_709</b>  | -           | conserved hypothetical protein                                              | 2.863 | 2.141 | 2.401 | 0.730 |
| <b>SMU_71</b>   | -           | MATE efflux family protein                                                  | 2.340 | 1.339 | 1.531 | 0.001 |
| <b>SMU_711</b>  | -           | conserved hypothetical protein                                              | 1.391 | 1.007 | 1.126 | 0.001 |
| <b>SMU_712</b>  | <i>pepC</i> | phosphoenolpyruvate carboxylase                                             | 0.000 | 0.000 | 0.000 | 0.008 |
| <b>SMU_713</b>  | <i>ftsW</i> | cell division protein                                                       | 0.002 | 0.001 | 0.002 | 0.002 |
| <b>SMU_714</b>  | <i>tuf</i>  | translation elongation factor Tu                                            | 0.000 | 0.000 | 0.000 | 0.077 |
| <b>SMU_715</b>  | <i>tpiA</i> | triosephosphate isomerase                                                   | 0.000 | 0.001 | 0.000 | 0.000 |

|                 |             |                                                                                                        |       |       |       |       |
|-----------------|-------------|--------------------------------------------------------------------------------------------------------|-------|-------|-------|-------|
| <b>SMU_716</b>  | <i>murN</i> | peptidoglycan branched peptide synthesis protein, alanine adding enzyme; methicillin resistance factor | 0.002 | 0.000 | 0.001 | 0.000 |
| <b>SMU_717</b>  | <i>murM</i> | beta-lactam resistance factor murM; Serine / alanine adding enzyme                                     | 0.043 | 0.426 | 0.021 | 0.002 |
| <b>SMU_718c</b> | -           | hydrolase, haloacid dehalogenase-like family                                                           | 0.563 | 0.440 | 0.353 | 0.000 |
| <b>SMU_719c</b> | -           | conserved hypothetical protein                                                                         | 1.720 | 1.564 | 1.790 | 0.001 |
| <b>SMU_72</b>   | -           | conserved hypothetical protein                                                                         | 2.245 | 4.467 | 2.203 | 0.003 |
| <b>SMU_720</b>  | -           | conserved hypothetical protein                                                                         | 2.856 | 2.255 | 2.428 | 0.192 |
| <b>SMU_721</b>  | -           | conserved hypothetical protein                                                                         | 0.612 | 0.574 | 0.536 | 0.001 |
| <b>SMU_722</b>  | -           | hypothetical protein                                                                                   | 1.045 | 1.712 | 2.473 | 0.001 |
| <b>SMU_723</b>  | <i>pacL</i> | calcium-transporting ATPase                                                                            | 0.140 | 0.000 | 0.039 | 0.027 |
| <b>SMU_724</b>  | <i>glpQ</i> | glycerophosphodiester phosphodiesterase                                                                | 0.667 | 0.861 | 0.727 | 0.000 |
| <b>SMU_725c</b> | -           | conserved hypothetical protein                                                                         | 1.619 | 1.968 | 1.984 | 0.000 |
| <b>SMU_727</b>  | <i>merR</i> | mercury resistance operon negative regulator                                                           | 1.519 | 1.661 | 1.731 | 0.000 |
| <b>SMU_728</b>  | -           | oxidoreductase                                                                                         | 1.723 | 1.938 | 1.855 | 0.010 |
| <b>SMU_73</b>   | -           | conserved hypothetical protein                                                                         | 0.722 | 0.911 | 0.678 | 0.004 |
| <b>SMU_730</b>  | -           | conserved hypothetical protein                                                                         | 1.638 | 1.787 | 1.197 | 0.000 |
| <b>SMU_731</b>  | -           | ABC transporter, ATP-binding protein                                                                   | 1.681 | 2.074 | 2.169 | 0.852 |
| <b>SMU_732</b>  | -           | conserved hypothetical protein                                                                         | 3.048 | 3.545 | 3.555 | 0.003 |
| <b>SMU_734</b>  | -           | conserved hypothetical protein (probable membrane protein)                                             | 0.061 | 0.086 | 0.119 | 0.001 |
| <b>SMU_735</b>  | -           | hypothetical protein                                                                                   | 1.238 | 1.556 | 1.483 | 0.006 |
| <b>SMU_737</b>  | -           | conserved hypothetical protein (possible alpha / beta superfamily hydrolase)                           | 1.113 | 1.280 | 1.093 | 0.001 |
| <b>SMU_738</b>  | -           | hypothetical protein                                                                                   | 0.000 | 0.000 | 0.000 | 0.001 |
| <b>SMU_739c</b> | -           | hypothetical protein                                                                                   | 1.348 | 1.330 | 1.281 | 0.000 |
| <b>SMU_74</b>   | <i>gmp</i>  | phosphoglycerate mutase-like protein                                                                   | 2.335 | 2.951 | 3.148 | 0.001 |
| <b>SMU_741</b>  | -           | conserved hypothetical protein                                                                         | 1.185 | 1.444 | 1.127 | 0.037 |
| <b>SMU_742</b>  | -           | conserved hypothetical protein, Cof family                                                             | 0.283 | 0.169 | 0.206 | 0.154 |
| <b>SMU_743</b>  | -           | hydrolase, haloacid dehalogenase-like family                                                           | 0.701 | 0.509 | 0.547 | 0.001 |
| <b>SMU_744</b>  | <i>ftsY</i> | cell division protein FtsY; signal recognition particle (docking protein)                              | 0.173 | 0.029 | 0.014 | 0.000 |
| <b>SMU_745</b>  | <i>lmrB</i> | drug-export protein; multidrug resistance protein                                                      | 1.095 | 1.251 | 1.726 | 0.002 |
| <b>SMU_746c</b> | -           | conserved hypothetical protein                                                                         | 1.044 | 1.497 | 0.024 | 0.001 |
| <b>SMU_747c</b> | -           | conserved hypothetical protein, permease-like                                                          | 1.867 | 1.754 | 0.033 | 0.001 |
| <b>SMU_748</b>  | -           | hypothetical protein                                                                                   | 0.332 | 0.245 | 0.258 | 0.000 |
| <b>SMU_75</b>   | <i>dacF</i> | D-alanyl-D-alanine carboxypeptidase (penicillin binding protein)                                       | 2.487 | 4.396 | 4.812 | 0.017 |
| <b>SMU_750c</b> | -           |                                                                                                        | 1.702 | 3.272 | 2.963 | 0.000 |

|                 |             |                                                                                            |       |       |       |       |
|-----------------|-------------|--------------------------------------------------------------------------------------------|-------|-------|-------|-------|
| <b>SMU_751</b>  | -           | conserved hypothetical protein (possible transcriptional regulator)                        | 0.666 | 0.247 | 0.293 | 0.001 |
| <b>SMU_752</b>  | -           | conserved hypothetical protein                                                             | 0.849 | 0.317 | 0.370 | 0.001 |
| <b>SMU_753</b>  | -           | conserved hypothetical protein                                                             | 2.232 | 0.920 | 0.271 | 0.001 |
| <b>SMU_754</b>  | <i>hprK</i> | HPr (serine) kinase/phosphatase                                                            | 0.002 | 0.001 | 0.004 | 0.000 |
| <b>SMU_755</b>  | <i>lgt</i>  | prolipoprotein diacylglyceryl transferase                                                  | 0.438 | 0.099 | 0.005 | 0.001 |
| <b>SMU_756</b>  | -           | conserved hypothetical protein                                                             | 1.882 | 1.199 | 0.262 | 0.001 |
| <b>SMU_757</b>  | -           | conserved hypothetical protein                                                             | 1.158 | 1.454 | 0.472 | 0.002 |
| <b>SMU_758c</b> | -           | conserved hypothetical protein                                                             | 1.624 | 2.696 | 0.839 | 7.118 |
| <b>SMU_759</b>  | -           | protease, U32 family                                                                       | 1.524 | 1.572 | 1.503 | 0.000 |
| <b>SMU_76</b>   | <i>ampD</i> | N-acetyl-muramidase (N-acetylmuramoyl-L-alanine amidase)                                   | 2.849 | 5.876 | 6.250 | 0.001 |
| <b>SMU_761</b>  | <i>yugD</i> | protease; related to collagenase                                                           | 1.289 | 1.020 | 0.999 | 0.000 |
| <b>SMU_764</b>  | <i>ahpC</i> | alkyl hydroperoxide reductase, subunit C                                                   | 0.834 | 0.553 | 0.415 | 0.002 |
| <b>SMU_765</b>  | <i>ahpF</i> | alkyl hydroperoxide reductase, subunit F                                                   | 0.564 | 0.432 | 0.354 | 0.001 |
| <b>SMU_766</b>  | -           | transposase                                                                                | 0.000 | 0.000 | 0.000 | 0.000 |
| <b>SMU_768c</b> | -           | conserved hypothetical protein                                                             | 1.193 | 1.147 | 1.391 | 0.006 |
| <b>SMU_769</b>  | -           | conserved hypothetical protein                                                             | 0.661 | 0.968 | 1.013 | 0.011 |
| <b>SMU_770c</b> | -           | manganese transporter/possible HitA ferric iron-binding periplasmic protein                | 1.125 | 0.713 | 1.042 | 7.557 |
| <b>SMU_771c</b> | -           | hypothetical protein                                                                       | 3.719 | 3.173 | 2.662 | 0.001 |
| <b>SMU_772</b>  | <i>gbpD</i> | bifunctional glucan-binding protein D and lipase                                           | 1.582 | 1.131 | 1.287 | 0.056 |
| <b>SMU_773c</b> | <i>lysS</i> | lysyl-tRNA synthetase                                                                      | 0.000 | 0.001 | 0.000 | 0.000 |
| <b>SMU_774</b>  | -           | hydrolase, haloacid dehalogenase-like                                                      | 1.095 | 0.752 | 0.051 | 0.001 |
| <b>SMU_775c</b> | -           | conserved hypothetical protein                                                             | 0.104 | 1.305 | 0.033 | 0.024 |
| <b>SMU_776</b>  | -           | conserved hypothetical protein; possible methyltransferase                                 | 0.572 | 0.335 | 0.464 | 0.194 |
| <b>SMU_777</b>  | <i>aroD</i> | 3-dehydroquinate dehydratase                                                               | 0.000 | 0.001 | 0.000 | 0.001 |
| <b>SMU_778</b>  | <i>aroE</i> | shikimate 5-dehydrogenase                                                                  | 0.001 | 0.000 | 0.000 | 0.000 |
| <b>SMU_779</b>  | <i>aroB</i> | 3-dehydroquinate synthase                                                                  | 0.000 | 0.000 | 0.001 | 0.001 |
| <b>SMU_78</b>   | <i>fruA</i> | fructan hydrolase; exo-beta-D-fructosidase                                                 | 2.664 | 3.469 | 3.850 | 0.001 |
| <b>SMU_780</b>  | <i>aroC</i> | chorismate synthase                                                                        | 0.007 | 0.000 | 0.000 | 0.001 |
| <b>SMU_781</b>  | <i>tyrA</i> | prephenate dehydrogenase                                                                   | 0.048 | 0.019 | 0.025 | 0.001 |
| <b>SMU_782</b>  | -           | conserved hypothetical protein                                                             | 0.480 | 0.695 | 0.524 | 0.001 |
| <b>SMU_784</b>  | <i>aroA</i> | 3-phosphoshikimate 1-carboxyvinyltransferase (5-enolpyruvylshikimate-3-phosphate synthase) | 0.006 | 0.000 | 0.000 | 0.000 |
| <b>SMU_785</b>  | <i>aroK</i> | shikimate kinase                                                                           | 0.001 | 0.001 | 0.000 | 0.000 |
| <b>SMU_786</b>  | <i>pheA</i> | prephenate dehydratase                                                                     | 0.446 | 0.612 | 0.493 | 0.000 |
| <b>SMU_787</b>  | <i>psr</i>  | transcriptional regulator, Psr-like protein                                                | 1.008 | 0.567 | 0.423 | 0.001 |
| <b>SMU_788</b>  | <i>trmA</i> | RNA methyltransferase, TrmA family                                                         | 0.706 | 0.751 | 0.465 | 0.001 |

|          |             |                                                                                   |       |       |       |       |
|----------|-------------|-----------------------------------------------------------------------------------|-------|-------|-------|-------|
| SMU_789  | <i>blpY</i> | conserved hypothetical protein (similar to BlpY)                                  | 1.201 | 1.107 | 1.291 | 0.001 |
| SMU_79   | <i>fruB</i> | fructan hydrolase; exo-beta-D-fructosidase                                        | 2.622 | 3.240 | 3.502 | 0.002 |
| SMU_790  | -           | conserved hypothetical protein                                                    | 0.761 | 0.541 | 0.608 | 0.000 |
| SMU_791c | -           | hypothetical protein                                                              | 1.511 | 1.673 | 1.943 | 0.008 |
| SMU_793  | -           | conserved hypothetical protein                                                    | 0.736 | 0.675 | 0.793 | 0.000 |
| SMU_794  | -           | hypothetical protein                                                              | 1.187 | 0.960 | 1.519 | 0.001 |
| SMU_795  | -           | conserved hypothetical protein (possible esterase)                                | 1.132 | 1.251 | 1.119 | 0.003 |
| SMU_796  | <i>ytfG</i> | conserved hypothetical protein (possible oxidoreductase)                          | 1.605 | 2.014 | 1.790 | 0.162 |
| SMU_797  | -           | conserved hypothetical protein                                                    | 2.828 | 2.445 | 2.420 | 0.001 |
| SMU_798c | -           | hypothetical protein                                                              | 0.288 | 0.475 | 0.457 | 0.000 |
| SMU_799c | -           | conserved hypothetical protein                                                    | 0.801 | 0.745 | 0.608 | 0.002 |
| SMU_80   | <i>hrcA</i> | heat-inducible transcription repressor                                            | 0.251 | 0.005 | 0.001 | 0.001 |
| SMU_800  | -           | conserved hypothetical protein                                                    | 1.632 | 1.561 | 1.229 | 0.008 |
| SMU_801  | <i>obg</i>  | GTP-binding protein, GTP1/Obg family                                              | 0.002 | 0.001 | 0.000 | 0.002 |
| SMU_802  | -           | conserved hypothetical protein                                                    | 0.179 | 0.177 | 0.610 | 0.000 |
| SMU_803c | <i>ykhF</i> | ABC transporter, ATP-binding protein                                              | 0.432 | 0.400 | 0.397 | 0.001 |
| SMU_804  | -           | hypothetical protein                                                              | 5.120 | 6.487 | 6.821 | 0.120 |
| SMU_805c | -           | amino acid ABC transporter, ATP-binding protein                                   | 1.009 | 0.702 | 0.480 | 0.000 |
| SMU_806c | <i>glnP</i> | glutamine ABC transporter, permease and solute binding protein                    | 1.282 | 0.904 | 0.819 | 0.001 |
| SMU_807  | -           | conserved hypothetical protein (possible membrane protein)                        | 0.449 | 0.403 | 0.411 | 0.001 |
| SMU_809  | <i>uvrB</i> | excinuclease ABC (subunit B); helicase subunit of the DNA excision repair complex | 1.467 | 0.737 | 0.783 | 0.001 |
| SMU_81   | <i>grpE</i> | co-chaperone protein GrpE                                                         | 0.001 | 0.000 | 0.000 | 0.001 |
| SMU_811  | -           | hypothetical protein                                                              | 1.795 | 1.400 | 1.806 | 0.003 |
| SMU_812  | -           | hypothetical protein                                                              | 0.781 | 0.399 | 0.737 | 0.001 |
| SMU_813  | <i>yabB</i> | hypothetical protein (possible transcriptional regulator)                         | 1.337 | 1.295 | 1.715 | 0.001 |
| SMU_814  | <i>mutT</i> | MutT/nudix family protein                                                         | 0.854 | 0.787 | 1.030 | 0.003 |
| SMU_815  | -           | amino acid ABC transporter, periplasmic amino acid-binding protein                | 1.115 | 1.434 | 1.288 | 0.000 |
| SMU_816  | <i>arcT</i> | aminotransferase                                                                  | 1.127 | 0.965 | 0.955 | 0.000 |
| SMU_817  | <i>glnH</i> | amino acid ABC transporter, substrate-binding protein                             | 0.924 | 1.059 | 1.104 | 0.001 |
| SMU_818  | <i>rpsU</i> | 30S ribosomal protein S21                                                         | 0.066 | 0.006 | 0.009 | 0.000 |
| SMU_819  | <i>mscL</i> | large conductance mechanosensitive channel                                        | 1.767 | 1.320 | 1.294 | 0.000 |
| SMU_82   | <i>dnaK</i> | chaperone protein, DnaK                                                           | 0.013 | 0.000 | 0.001 | 0.001 |
| SMU_820  | -           | conserved hypothetical protein                                                    | 1.277 | 1.205 | 1.227 | 0.001 |
| SMU_821  | <i>dnaG</i> | DNA primase                                                                       | 0.001 | 0.001 | 0.000 | 0.000 |
| SMU_822  | <i>rpoD</i> | RNA polymerase sigma-70 factor                                                    | 0.000 | 0.000 | 0.000 | 0.000 |
| SMU_823  | -           | conserved hypothetical protein                                                    | 0.702 | 0.267 | 0.508 | 0.002 |

|                 |             |                                                                                                 |        |       |       |       |
|-----------------|-------------|-------------------------------------------------------------------------------------------------|--------|-------|-------|-------|
| <b>SMU_824</b>  | <i>rmlD</i> | dTDP-4-keto-L-rhamnose reductase                                                                | 0.002  | 0.000 | 0.001 | 0.000 |
| <b>SMU_825</b>  | <i>rgpA</i> | polysaccharide biosynthesis protein; rhamnosyl transferase                                      | 0.111  | 0.000 | 0.000 | 0.034 |
| <b>SMU_826</b>  | <i>rgpB</i> | rhamnosyltransferase; polysaccharide biosynthesis protein                                       | 0.025  | 0.023 | 0.031 | 0.000 |
| <b>SMU_827</b>  | <i>rgpC</i> | polysaccharide ABC transporter membrane-spanning protein                                        | 0.002  | 0.001 | 0.001 | 0.001 |
| <b>SMU_828</b>  | <i>rgpD</i> | ABC transporter ATP-binding protein                                                             | 0.083  | 0.063 | 0.018 | 0.001 |
| <b>SMU_829</b>  | <i>rgpE</i> | glycosyltransferase                                                                             | 0.010  | 0.001 | 0.002 | 0.001 |
| <b>SMU_83</b>   | <i>dnaJ</i> | co-chaperone protein DnaJ                                                                       | 0.148  | 0.008 | 0.000 | 0.000 |
| <b>SMU_830</b>  | <i>rgpF</i> | polysaccharide biosynthesis protein                                                             | 0.001  | 0.001 | 0.001 | 0.001 |
| <b>SMU_831</b>  | -           | conserved hypothetical protein                                                                  | 0.540  | 0.417 | 0.002 | 0.003 |
| <b>SMU_832</b>  | -           | hypothetical protein                                                                            | 9.579  | 1.997 | 1.714 | 0.002 |
| <b>SMU_833</b>  | <i>gtrB</i> | glycosyltransferase, family 2                                                                   | 2.781  | 0.820 | 0.047 | 0.002 |
| <b>SMU_834</b>  | -           | glycosyltransferase                                                                             | 2.624  | 1.127 | 3.391 | 0.001 |
| <b>SMU_835</b>  | -           | conserved hypothetical protein (possible membrane protein)                                      | 10.925 | 9.396 | 3.594 | 0.090 |
| <b>SMU_836</b>  | -           | hypothetical protein                                                                            | 2.041  | 2.896 | 1.863 | 0.000 |
| <b>SMU_837</b>  | <i>ycgG</i> | oxidoreductase, aldo/keto reductase family                                                      | 1.416  | 1.457 | 1.076 | 0.000 |
| <b>SMU_838</b>  | <i>gshR</i> | glutathione reductase                                                                           | 1.423  | 1.177 | 1.305 | 0.001 |
| <b>SMU_839</b>  | <i>fol</i>  | folyl-polyglutamate synthetase/dihydrofolate synthase                                           | 0.941  | 0.807 | 0.682 | 0.004 |
| <b>SMU_84</b>   | <i>truA</i> | tRNA pseudouridine synthase A                                                                   | 0.916  | 0.521 | 0.717 | 0.001 |
| <b>SMU_840c</b> | -           | hypothetical protein                                                                            | 0.935  | 0.994 | 1.205 | 0.006 |
| <b>SMU_841</b>  | -           | aminotransferase, class V; possible cysteine desulphurase                                       | 0.899  | 0.677 | 0.961 | 0.001 |
| <b>SMU_842</b>  | <i>thil</i> | thiamine biosynthesis protein                                                                   | 0.709  | 0.562 | 0.788 | 0.000 |
| <b>SMU_843</b>  | -           | ; possible capsule biosynthesis protein CapA                                                    | 1.214  | 0.856 | 1.069 | 0.160 |
| <b>SMU_844</b>  | -           | conserved hypothetical protein                                                                  | 1.087  | 1.059 | 0.959 | 0.001 |
| <b>SMU_845</b>  | -           | conserved hypothetical protein                                                                  | 1.886  | 1.536 | 2.304 | 0.096 |
| <b>SMU_846</b>  | <i>rplU</i> | Ribosomal protein L21-within SMU_847c on opposite strand                                        | 0.007  | 0.000 | 0.001 | 0.000 |
| <b>SMU_847c</b> | -           | hypothetical protein                                                                            | 0.041  | 0.020 | 0.011 | 0.002 |
| <b>SMU_848</b>  | -           | conserved hypothetical protein                                                                  | 0.572  | 0.247 | 0.498 | 0.000 |
| <b>SMU_849</b>  | <i>rpmA</i> | 50S ribosomal protein L27                                                                       | 0.000  | 0.000 | 0.000 | 0.000 |
| <b>SMU_85</b>   | <i>thiD</i> | phosphomethylpyrimidine kinase                                                                  | 2.242  | 1.443 | 0.539 | 0.000 |
| <b>SMU_850</b>  | -           | acetyltransferase, GNAT family                                                                  | 1.200  | 1.161 | 1.248 | 0.000 |
| <b>SMU_851</b>  | -           | conserved hypothetical protein                                                                  | 1.124  | 1.721 | 1.504 | 3.438 |
| <b>SMU_852</b>  | -           | transcriptional regulator, LysR family                                                          | 0.133  | 0.000 | 0.001 | 0.001 |
| <b>SMU_853</b>  | <i>lspA</i> | lipoprotein signal peptidase                                                                    | 0.260  | 0.066 | 0.034 | 0.001 |
| <b>SMU_854</b>  | <i>rluD</i> | ribosomal large subunit pseudouridine synthase D                                                | 0.919  | 0.158 | 0.479 | 0.000 |
| <b>SMU_855</b>  | -           | conserved hypothetical protein                                                                  | 1.072  | 0.369 | 0.021 | 0.005 |
| <b>SMU_856</b>  | <i>pyrR</i> | bifunctional protein: pyrimidine operon regulatory protein and uracil phosphoribosyltransferase | 0.602  | 0.465 | 0.025 | 0.036 |
| <b>SMU_857</b>  | <i>pbuX</i> | xanthine/uracil permease                                                                        | 0.866  | 0.870 | 0.096 | 0.002 |

|         |              |                                                                                              |       |        |       |       |
|---------|--------------|----------------------------------------------------------------------------------------------|-------|--------|-------|-------|
| SMU_858 | <i>pyrB</i>  | aspartate transcarbamoylase                                                                  | 0.768 | 0.619  | 0.008 | 0.001 |
| SMU_859 | <i>carA</i>  | carbamoyl-phosphate synthase,small subunit                                                   | 1.069 | 0.951  | 0.074 | 0.006 |
| SMU_86  | -            | conserved hypothetical protein                                                               | 2.253 | 1.796  | 1.932 | 0.001 |
| SMU_860 | <i>carB</i>  | carbamoyl-phosphate synthase, large subunit                                                  | 1.099 | 0.806  | 0.005 | 0.001 |
| SMU_862 | -            | conserved hypothetical protein                                                               | 1.247 | 1.455  | 1.145 | 6.750 |
| SMU_863 | -            | ABC transporter, ATP-binding protein                                                         | 0.507 | 0.892  | 0.476 | 0.007 |
| SMU_864 | -            | ABC transporter, permease component                                                          | 1.522 | 2.020  | 1.654 | 0.001 |
| SMU_865 | <i>rpsP</i>  | 30S ribosomal protein S16                                                                    | 0.019 | 0.000  | 0.000 | 0.000 |
| SMU_866 | -            | conserved hypothetical protein                                                               | 0.502 | 0.033  | 0.129 | 0.002 |
| SMU_867 | <i>rimM</i>  | 16S rRNA processing protein                                                                  | 0.165 | 0.041  | 0.008 | 0.000 |
| SMU_868 | <i>trmD</i>  | tRNA (guanine-N1)-methyltransferase                                                          | 0.002 | 0.001  | 0.000 | 0.020 |
| SMU_869 | <i>trxB2</i> | thioredoxin reductase                                                                        | 0.010 | 0.005  | 0.000 | 0.000 |
| SMU_87  | -            | conserved hypothetical protein                                                               | 1.767 | 1.585  | 1.722 | 0.000 |
| SMU_870 | <i>fruR</i>  | lactose phosphotransferase system repressor/transcriptional repressor of the fructose operon | 1.441 | 1.079  | 8.044 | 1.140 |
| SMU_871 | <i>fruB</i>  | fructose-1-phosphate kinase                                                                  | 0.695 | 0.404  | 5.538 | 0.000 |
| SMU_872 | <i>fruA</i>  | fructose-specific PTS system enzyme IIBC component                                           | 0.836 | 0.824  | 1.851 | 0.005 |
| SMU_873 | <i>metE</i>  | 5-methyltetrahydropteroyltriglutamate--homocysteine S-methyltransferase                      | 0.701 | 0.877  | 0.935 | 0.001 |
| SMU_874 | <i>methH</i> | 5-methyltetrahydrofolate--homocysteine methyltransferase                                     | 0.768 | 0.906  | 1.078 | 0.000 |
| SMU_876 | <i>msmR</i>  | MSM operon regulatory protein                                                                | 0.829 | 1.022  | 1.083 | 0.000 |
| SMU_877 | <i>agaL</i>  | alpha-galactosidase (melibiase)                                                              | 1.624 | 1.125  | 1.439 | 0.281 |
| SMU_878 | <i>msmE</i>  | ABC transporter, sugar-binding protein                                                       | 1.165 | 1.102  | 1.430 | 0.001 |
| SMU_879 | <i>msmF</i>  | ABC transporter, sugar permease protein                                                      | 1.531 | 1.390  | 1.541 | 0.010 |
| SMU_880 | <i>msmG</i>  | multiple sugar-binding transport system permease protein MsmG                                | 1.521 | 1.387  | 1.809 | 0.215 |
| SMU_881 | <i>gtfA</i>  | sucrose phosphorylase                                                                        | 1.164 | 1.330  | 1.461 | 0.001 |
| SMU_882 | <i>msmK</i>  | multiple sugar-binding transport ATP-binding protein MsmK                                    | 0.684 | 0.634  | 0.617 | 0.000 |
| SMU_883 | <i>dexB</i>  | glucan 1,6-alpha-glucosidase                                                                 | 1.047 | 0.991  | 0.985 | 0.000 |
| SMU_885 | <i>galR</i>  | galactose repressor                                                                          | 1.089 | 1.058  | 1.126 | 0.100 |
| SMU_886 | <i>galK</i>  | galactokinase                                                                                | 0.986 | 0.913  | 0.816 | 1.489 |
| SMU_887 | <i>galT</i>  | galactose-1-phosphate uridylyltransferase                                                    | 1.464 | 1.612  | 1.576 | 0.690 |
| SMU_888 | <i>galE</i>  | UDP-glucose 4-epimerase                                                                      | 0.615 | 0.793  | 0.823 | 0.000 |
| SMU_889 | <i>pbpX</i>  | penicillin-binding protein 2X                                                                | 0.779 | 0.647  | 0.793 | 0.003 |
| SMU_88c | -            | mechanosensitive ion channel protein                                                         | 2.146 | 2.572  | 3.090 | 0.001 |
| SMU_890 | -            | conserved hypothetical protein                                                               | 2.872 | 11.425 | 0.751 | 0.349 |
| SMU_891 | <i>hsdM</i>  | type I restriction-modification system DNA methylase                                         | 1.023 | 1.464  | 1.202 | 0.001 |

|                 |             |                                                                        |       |       |       |        |
|-----------------|-------------|------------------------------------------------------------------------|-------|-------|-------|--------|
| <b>SMU_892</b>  | <i>hsdS</i> | type I restriction-modification system specificity determinant         | 1.389 | 1.383 | 1.290 | 0.019  |
| <b>SMU_893</b>  | <i>prcC</i> | anticodon nuclease                                                     | 2.755 | 2.468 | 2.610 | 0.001  |
| <b>SMU_895</b>  | -           | conserved hypothetical protein                                         | 0.092 | 0.008 | 0.000 | 0.002  |
| <b>SMU_896</b>  | -           | conserved hypothetical protein                                         | 2.076 | 2.514 | 2.013 | 0.000  |
| <b>SMU_897</b>  | <i>hsdR</i> | type I restriction-modification system, helicase subunits              | 1.892 | 2.164 | 2.636 | 0.367  |
| <b>SMU_898</b>  | -           | conserved hypothetical protein                                         | 0.480 | 0.436 | 0.155 | 0.002  |
| <b>SMU_899</b>  | -           | conserved hypothetical protein, DegV family                            | 1.508 | 1.302 | 1.243 | 0.000  |
| <b>SMU_89c</b>  | -           | nitrite transporter                                                    | 1.421 | 1.428 | 1.502 | 0.001  |
| <b>SMU_900</b>  | <i>dapB</i> | dihydrodipicolinate reductase                                          | 0.147 | 0.026 | 0.000 | 0.000  |
| <b>SMU_901</b>  | <i>cca</i>  | CCA-adding enzyme; tRNA nucleotidyltransferase                         | 0.019 | 0.014 | 0.001 | 0.000  |
| <b>SMU_902</b>  | <i>ypjG</i> | ABC transporter, ATP-binding protein                                   | 0.343 | 0.293 | 0.242 | 0.031  |
| <b>SMU_905</b>  | -           | ABC-type multidrug/protein/lipid transport system, ATPase component    | 2.068 | 1.756 | 1.546 | 0.229  |
| <b>SMU_906</b>  | -           | ABC transporter, ATP-binding / permease protein                        | 1.195 | 0.907 | 0.829 | 0.001  |
| <b>SMU_909</b>  | <i>mIn</i>  | malate permease                                                        | 1.047 | 1.078 | 1.062 | 0.000  |
| <b>SMU_91</b>   | <i>ropA</i> | peptidyl-prolyl isomerase, trigger factor                              | 1.846 | 1.351 | 0.940 | 1.862  |
| <b>SMU_910</b>  | <i>gtfD</i> | glucosyltransferase-S                                                  | 1.100 | 1.036 | 1.051 | 0.008  |
| <b>SMU_911c</b> | -           | hypothetical protein                                                   | 0.835 | 0.714 | 1.208 | 0.001  |
| <b>SMU_913</b>  | -           | NADP-specific glutamate dehydrogenase                                  | 1.243 | 1.059 | 0.469 | 0.001  |
| <b>SMU_914c</b> | -           | conserved hypothetical protein                                         | 1.917 | 2.106 | 2.184 | 0.000  |
| <b>SMU_915c</b> | -           | conserved hypothetical protein                                         | 1.342 | 1.240 | 1.218 | 0.826  |
| <b>SMU_916c</b> | -           | conserved hypothetical protein                                         | 1.986 | 2.097 | 1.767 | 15.802 |
| <b>SMU_917c</b> | <i>ygcM</i> | 6-pyruvoyl tetrahydropterin synthase, PTPS                             | 1.311 | 1.320 | 1.011 | 0.770  |
| <b>SMU_919c</b> | -           | ATPase, confers aluminum resistance                                    | 3.155 | 2.309 | 1.750 | 30.804 |
| <b>SMU_921</b>  | <i>rcrR</i> | transcriptional regulator                                              | 1.233 | 0.639 | 0.458 | 0.001  |
| <b>SMU_922</b>  | <i>rcrP</i> | ABC-type multidrug / protein/ lipid transport system, ATPase component | 0.139 | 0.132 | 0.229 | 0.001  |
| <b>SMU_923</b>  | <i>rcrQ</i> | ABC-type multidrug/protein/lipid transport system, ATPase component    | 0.092 | 0.047 | 0.066 | 0.001  |
| <b>SMU_924</b>  | <i>tpx</i>  | thiol peroxidase                                                       | 0.789 | 0.815 | 0.826 | 0.000  |
| <b>SMU_925</b>  | <i>cipl</i> | bacteriocin immunity protein                                           | 0.638 | 0.331 | 0.663 | 0.002  |
| <b>SMU_926</b>  | <i>relP</i> | GTP pyrophosphokinase family protein                                   | 0.938 | 1.013 | 1.128 | 0.001  |
| <b>SMU_927</b>  | <i>relR</i> | response regulator                                                     | 1.097 | 0.787 | 0.687 | 0.002  |
| <b>SMU_928</b>  | <i>relS</i> | sensor histidine kinase                                                | 0.629 | 0.587 | 0.735 | 0.046  |
| <b>SMU_929c</b> | -           | conserved hypothetical protein                                         | 1.283 | 2.173 | 1.975 | 0.000  |
| <b>SMU_92c</b>  | -           |                                                                        | 1.104 | 1.228 | 1.271 | 0.000  |
| <b>SMU_930c</b> | <i>cpsY</i> | transcriptional regulator                                              | 0.767 | 1.150 | 0.909 | 0.000  |
| <b>SMU_932</b>  | -           | conserved hypothetical protein                                         | 0.837 | 0.645 | 0.499 | 0.000  |



|                 |              |                                                                         |       |       |       |        |
|-----------------|--------------|-------------------------------------------------------------------------|-------|-------|-------|--------|
| <b>SMU_933</b>  | <i>atmA</i>  | amino acid ABC transporter, amino acid substrate-binding protein        | 1.338 | 1.347 | 1.022 | 54.969 |
| <b>SMU_934</b>  | -            | amino acid ABC transporter, permease protein                            | 1.748 | 2.031 | 1.609 | 0.001  |
| <b>SMU_935</b>  | -            | amino acid ABC transporter, permease protein                            | 0.902 | 0.962 | 0.969 | 0.002  |
| <b>SMU_936</b>  | -            | amino acid ABC transporter, ATP-binding protein                         | 0.391 | 0.425 | 0.455 | 0.000  |
| <b>SMU_937</b>  | <i>mvaD</i>  | diphosphomevalonate decarboxylase                                       | 0.092 | 0.011 | 0.000 | 0.001  |
| <b>SMU_938</b>  | <i>mvaK2</i> | phosphomevalonate kinase                                                | 0.088 | 0.072 | 0.004 | 0.001  |
| <b>SMU_939</b>  | <i>fni</i>   | isopentenyl-diphosphate delta-isomerase                                 | 0.002 | 0.003 | 0.001 | 0.005  |
| <b>SMU_93c</b>  | -            |                                                                         | 1.009 | 1.841 | 1.102 | 0.000  |
| <b>SMU_940c</b> | <i>patB</i>  | hemolysin III-related protein                                           | 2.515 | 0.003 | 0.009 | 0.003  |
| <b>SMU_941c</b> | -            | conserved hypothetical protein                                          | 0.311 | 0.052 | 0.050 | 0.005  |
| <b>SMU_942</b>  | <i>mvaA</i>  | 3-hydroxy-3-methylglutaryl-CoA reductase                                | 0.001 | 0.000 | 0.005 | 0.001  |
| <b>SMU_943c</b> | <i>hmcM</i>  | hydroxymethylglutaryl-CoA synthase                                      | 0.001 | 0.000 | 0.000 | 0.000  |
| <b>SMU_944</b>  | <i>thyA</i>  | thymidylate synthase                                                    | 0.012 | 0.005 | 0.005 | 0.000  |
| <b>SMU_946</b>  | <i>pnuC</i>  | transporter for NMN                                                     | 1.611 | 1.508 | 1.460 | 0.002  |
| <b>SMU_947</b>  | <i>dfrA</i>  | dihydrofolate reductase                                                 | 0.000 | 0.000 | 0.000 | 0.000  |
| <b>SMU_948</b>  | -            | conserved hypothetical protein                                          | 2.740 | 1.798 | 0.191 | 0.002  |
| <b>SMU_949</b>  | <i>clpX</i>  | ATP-dependent Clp protease subunit X                                    | 0.972 | 0.028 | 0.011 | 0.000  |
| <b>SMU_94c</b>  | <i>tpn</i>   | transposase fragment                                                    | 1.681 | 2.101 | 1.909 | 0.009  |
| <b>SMU_950</b>  | <i>era</i>   | GTP-binding protein                                                     | 0.000 | 0.001 | 0.000 | 0.007  |
| <b>SMU_951</b>  | <i>hutM</i>  | amino acid permease                                                     | 0.495 | 0.509 | 0.347 | 0.001  |
| <b>SMU_952</b>  | <i>mmuM</i>  | homocysteine S-methyltransferase                                        | 1.800 | 1.902 | 1.643 | 0.003  |
| <b>SMU_953c</b> | -            | transcriptional regulator, GntR family                                  | 1.448 | 1.791 | 1.372 | 0.133  |
| <b>SMU_954</b>  | <i>pdxK</i>  | pyridoxal kinase                                                        | 1.823 | 1.834 | 1.546 | 0.001  |
| <b>SMU_955</b>  | -            | conserved hypothetical protein                                          | 0.377 | 0.507 | 0.384 | 0.001  |
| <b>SMU_956</b>  | <i>clp</i>   | ATP-dependent Clp protease, ATP-binding subunit                         | 0.788 | 0.725 | 0.634 | 0.001  |
| <b>SMU_957</b>  | <i>rplJ</i>  | 50S ribosomal protein L10                                               | 0.000 | 0.000 | 0.000 | 0.000  |
| <b>SMU_958</b>  | -            | hypothetical protein                                                    | 0.035 | 0.001 | 0.000 | 0.000  |
| <b>SMU_959c</b> | -            | hypothetical protein                                                    | 0.000 | 0.000 | 0.002 | 0.000  |
| <b>SMU_96</b>   | <i>rpoE</i>  | DNA-directed RNA polymerase, delta subunit                              | 0.118 | 0.007 | 0.019 | 0.000  |
| <b>SMU_960</b>  | <i>rpl</i>   | 50S ribosomal protein L7/L12                                            | 0.000 | 0.000 | 0.000 | 0.000  |
| <b>SMU_961</b>  | -            | macrophage infectivity potentiator-related protein                      | 3.809 | 4.789 | 4.505 | 0.652  |
| <b>SMU_962</b>  | <i>mmgC</i>  | acyl-CoA dehydrogenase                                                  | 0.705 | 0.717 | 0.695 | 0.004  |
| <b>SMU_963c</b> | -            | polysaccharide deacetylase family protein                               | 1.251 | 1.052 | 1.020 | 0.001  |
| <b>SMU_965</b>  | <i>hom</i>   | homoserine dehydrogenase                                                | 0.000 | 0.000 | 0.000 | 0.000  |
| <b>SMU_966</b>  | <i>thrB</i>  | homoserine kinase                                                       | 0.000 | 0.001 | 0.000 | 0.023  |
| <b>SMU_967</b>  | <i>folC</i>  | bifunctional protein: folypolyglutamate synthase/dihydrofolate synthase | 0.135 | 0.003 | 0.001 | 0.001  |

|                 |              |                                                                                           |       |       |       |        |
|-----------------|--------------|-------------------------------------------------------------------------------------------|-------|-------|-------|--------|
| <b>SMU_968</b>  | <i>folE</i>  | GTP cyclohydrolase I                                                                      | 0.777 | 0.499 | 0.025 | 0.276  |
| <b>SMU_969</b>  | <i>folP</i>  | dihydropteroate synthase                                                                  | 0.382 | 0.233 | 0.000 | 0.001  |
| <b>SMU_97</b>   | <i>pyrG</i>  | CTP synthetase                                                                            | 0.000 | 0.000 | 0.000 | 0.000  |
| <b>SMU_970</b>  | <i>folA</i>  | dihydroneopterin aldolase                                                                 | 0.998 | 1.133 | 0.002 | 0.000  |
| <b>SMU_971</b>  | <i>folK</i>  | 2-amino-4-hydroxy-6-hydroxymethyl-dihydropteridine pyrophosphokinase                      | 1.940 | 1.418 | 0.001 | 0.699  |
| <b>SMU_972</b>  | <i>murB</i>  | UDP-N-acetylenolpyruvoylglucosamine reductase                                             | 0.012 | 0.086 | 0.067 | 0.000  |
| <b>SMU_973</b>  | <i>potA</i>  | ABC transporter ATP-binding protein - spermidine/putrescine transport                     | 0.563 | 0.282 | 0.313 | 0.001  |
| <b>SMU_974</b>  | <i>potB</i>  | spermidine / putrescine ABC transporter (permease protein)                                | 0.885 | 0.258 | 0.373 | 0.001  |
| <b>SMU_975</b>  | <i>potC</i>  | spermidine/putrescine ABC transporter, permease                                           | 1.204 | 0.530 | 0.721 | 0.004  |
| <b>SMU_976</b>  | <i>potD</i>  | spermidine/putrescine ABC transporter, spermidine/putrescine-binding protein              | 2.101 | 1.489 | 2.800 | 0.002  |
| <b>SMU_977</b>  | <i>licT</i>  | transcription antiterminator LicT (fragment)                                              | 0.790 | 0.988 | 0.761 | 0.000  |
| <b>SMU_980</b>  | <i>bglP</i>  | beta-glucoside-specific EII permease                                                      | 0.812 | 0.787 | 0.835 | 23.142 |
| <b>SMU_981</b>  | <i>bglB1</i> | beta-glucosidase, BglB protein                                                            | 1.331 | 1.069 | 0.998 | 0.000  |
| <b>SMU_982</b>  | <i>bglB2</i> | beta-glucosidase, BglB protein                                                            | 1.140 | 1.162 | 1.204 | 0.000  |
| <b>SMU_983</b>  | <i>bglC</i>  | transcriptional regulator                                                                 | 1.171 | 0.861 | 0.794 | 0.009  |
| <b>SMU_984</b>  | -            | hypothetical protein                                                                      | 2.246 | 3.092 | 2.541 | 0.002  |
| <b>SMU_985</b>  | <i>bglA</i>  | 6-phospho-beta-glucosidase                                                                | 1.115 | 1.192 | 1.160 | 0.002  |
| <b>SMU_986c</b> | -            | conserved hypothetical protein                                                            | 1.367 | 1.326 | 1.581 | 0.000  |
| <b>SMU_987</b>  | <i>wapA</i>  | cell wall surface anchor family protein                                                   | 1.257 | 1.593 | 1.437 | 0.202  |
| <b>SMU_988</b>  | <i>cls</i>   | cardiolipin synthase                                                                      | 1.097 | 0.323 | 0.223 | 0.002  |
| <b>SMU_989</b>  | <i>asd</i>   | aspartate-semialdehyde dehydrogenase                                                      | 0.002 | 0.001 | 0.000 | 0.013  |
| <b>SMU_99</b>   | <i>fbaA</i>  | fructose-bisphosphate aldolase                                                            | 0.000 | 0.000 | 0.000 | 0.001  |
| <b>SMU_990</b>  | <i>dapA</i>  | dihydrodipicolinate synthase                                                              | 0.947 | 0.377 | 0.403 | 0.003  |
| <b>SMU_991</b>  | -            | conserved hypothetical protein (similar to ribonucleotide reductase alpha subunit)        | 2.766 | 3.526 | 3.586 | 0.001  |
| <b>SMU_992</b>  | -            | hypothetical protein                                                                      | 1.190 | 1.124 | 1.092 | 0.117  |
| <b>SMU_993</b>  | <i>ylqL</i>  | GTP-binding protein                                                                       | 0.000 | 0.000 | 0.000 | 0.000  |
| <b>SMU_994</b>  | <i>rnh</i>   | ribonuclease HII                                                                          | 0.282 | 0.143 | 0.202 | 0.000  |
| <b>SMU_995</b>  | <i>yclN</i>  | ferrichrome ABC transporter (permease)                                                    | 1.156 | 1.318 | 1.135 | 0.022  |
| <b>SMU_996</b>  | <i>yclN</i>  | ABC transporter, permease protein; possible ferrichrome transport system                  | 1.659 | 1.571 | 1.612 | 0.013  |
| <b>SMU_997</b>  | <i>fecE</i>  | inorganic ion ABC transporter, ATP-binding protein; possible ferrichrome transport system | 0.953 | 1.081 | 1.016 | 0.001  |

|                |             |                                              |       |       |       |       |
|----------------|-------------|----------------------------------------------|-------|-------|-------|-------|
| <b>SMU_998</b> | <i>fatB</i> | ABC transporter, ferrichrome-binding protein | 0.442 | 0.613 | 0.366 | 0.001 |
| <b>SMU_999</b> | -           | hypothetical protein                         | 1.569 | 1.311 | 1.283 | 0.002 |
| <b>SMU_r01</b> | -           |                                              | 0.000 | 0.000 | 0.000 | 0.000 |
| <b>SMU_r02</b> | -           |                                              | 0.000 | 0.000 | 0.000 | 0.000 |
| <b>SMU_r03</b> | -           |                                              | 0.000 | 0.000 | 0.000 | 0.000 |
| <b>SMU_r04</b> | -           |                                              | 0.000 | 0.000 | 0.000 | 0.000 |
| <b>SMU_r05</b> | -           |                                              | 0.000 | 0.000 | 0.000 | 0.000 |
| <b>SMU_r06</b> | -           |                                              | 0.000 | 0.000 | 0.000 | 0.000 |
