# Supplementary material for: Genomewide Identification of Essential Genes and Fitness Determinants of Streptococcus mutans UA159
Source: PubMed Central journal article supplement (PMC5806208; doi:10.1128/msphere.00031-18), 2018-02-07
Supplement: sph001182474st3.pdf [file sph001182474st3.pdf]

Table S3

| Locus     | Gene         | Product                                                                                                                     | <i>S. agalactiae</i><br>A909 | <i>S. pneumoniae</i> | <i>S. pyogenes</i><br>MGAS5448 | <i>S. sanguinis</i> | Essential in other bacteria <sup>a</sup> | Core Genome <sup>b</sup> |
|-----------|--------------|-----------------------------------------------------------------------------------------------------------------------------|------------------------------|----------------------|--------------------------------|---------------------|------------------------------------------|--------------------------|
| SMU_01    | <i>dnaA</i>  | chromosomal replication initiator protein DnaA                                                                              | essential                    | non                  | essential                      | essential           | -                                        | yes                      |
| SMU_02    | <i>dnaN</i>  | DNA polymerase III, beta subunit                                                                                            | essential                    | non                  | essential                      | essential           | -                                        | yes                      |
| SMU_07    | <i>pth</i>   | peptidyl-tRNA hydrolase                                                                                                     | essential                    | essential            | non                            | essential           | -                                        | yes                      |
| SMU_1045c | <i>ppnK</i>  | NAD(+) kinase (ATP-NAD kinase)                                                                                              | essential                    | essential            | essential                      | essential           | -                                        | no                       |
| SMU_1051  | <i>nifS</i>  | aminotransferase (class V); possible iron-sulfur cofactor synthesis protein; pyridoxal-phosphate dependent aminotransferase | non                          | essential            | essential                      | essential           | -                                        | no                       |
| SMU_1075  | <i>dfp</i>   | DNA/pantothenate metabolism flavoprotein                                                                                    | non                          | essential            | essential                      | non                 | -                                        | no                       |
| SMU_1085  | <i>rf1</i>   | peptide chain release factor 1                                                                                              | essential                    | essential            | essential                      | essential           | -                                        | yes                      |
| SMU_1114  | <i>gyrA</i>  | DNA gyrase A subunit                                                                                                        | essential                    | non                  | essential                      | essential           | -                                        | yes                      |
| SMU_1115  | <i>ldh</i>   | L-lactate dehydrogenase                                                                                                     | non                          | non                  | non                            | non                 | essential                                | yes                      |
| SMU_1126  | <i>coaA</i>  | pantothenate kinase                                                                                                         | non                          | essential            | essential                      | non                 | -                                        | yes                      |
| SMU_1136  | <i>pstC</i>  | phosphate ABC transporter, permease                                                                                         | essential                    | non                  | non                            | essential           | -                                        | yes                      |
| SMU_1137  | <i>pstC1</i> | phosphate ABC transporter, permease                                                                                         | essential                    | non                  | non                            | non                 | -                                        | yes                      |
| SMU_1138  | <i>pstS</i>  | phosphate ABC transporter, periplasmic phosphate-binding protein                                                            | essential                    | non                  | non                            | essential           | -                                        | yes                      |
| SMU_1143c | <i>mreA</i>  | bifunctional protein: riboflavin kinase/flavin adenine dinucleotide (FAD) synthase                                          | essential                    | non                  | essential                      | essential           | -                                        | yes                      |

|                  |              |                                                             |           |           |           |           |     |     |
|------------------|--------------|-------------------------------------------------------------|-----------|-----------|-----------|-----------|-----|-----|
| <b>SMU_1187</b>  | <i>glmS</i>  | L-glutamine-D-fructose-6-phosphate amidotransferase         | essential | essential | essential | essential | -   | yes |
| <b>SMU_1190</b>  | <i>pykF</i>  | pyruvate kinase                                             | essential | essential | essential | essential | -   | yes |
| <b>SMU_1191</b>  | <i>pfk</i>   | 6-phosphofructokinase                                       | essential | essential | essential | essential | -   | yes |
| <b>SMU_1192</b>  | <i>dnaE</i>  | DNA-polymerase III subunit alpha                            | essential | essential | essential | essential | -   | yes |
| <b>SMU_1201c</b> | -            | conserved hypothetical protein                              | non       | non       | non       | non       | non | yes |
| <b>SMU_1204</b>  | <i>parC</i>  | DNA topoisomerase IV subunit A                              | essential | essential | essential | essential | -   | no  |
| <b>SMU_1210</b>  | <i>parE</i>  | DNA topoisomerase IV subunit B                              | essential | essential | essential | essential | -   | no  |
| <b>SMU_1211</b>  | -            | conserved hypothetical protein                              | essential | essential | essential | essential | -   | no  |
| <b>SMU_123</b>   | <i>polC</i>  | DNA polymerase III, alpha subunit                           | essential | non       | essential | essential | -   | yes |
| <b>SMU_1247</b>  | <i>eno</i>   | enolase                                                     | essential | essential | essential | essential | -   | no  |
| <b>SMU_1277</b>  | <i>gyrB</i>  | DNA gyrase subunit B                                        | essential | essential | essential | essential | -   | no  |
| <b>SMU_1294</b>  | <i>flaW</i>  | flavodoxin                                                  | essential | non       | non       | non       | -   | yes |
| <b>SMU_13</b>    | -            | cell-cycle protein, PP-loop superfamily                     | essential | non       | essential | essential | -   | yes |
| <b>SMU_1326</b>  | <i>prfB</i>  | peptide chain release factor                                | essential | essential | essential | essential | -   | no  |
| <b>SMU_1426c</b> | <i>femD</i>  | phosphoglucosamine mutase (phosphoacetylglucosamine mutase) | essential | essential | essential | essential | -   | yes |
| <b>SMU_1429</b>  | <i>murC2</i> | UDP-N-acetylmuramyl tripeptide synthetase                   | essential | essential | essential | essential | -   | yes |
| <b>SMU_1457</b>  | <i>rmlB</i>  | dTDP-glucose-4,6-dehydratase                                | essential | essential | essential | non       | -   | yes |
| <b>SMU_1460</b>  | <i>rmlC</i>  | dTDP-4-dehydrorhamnose 3,5-epimerase                        | essential | non       | non       | non       | -   | yes |
| <b>SMU_1461</b>  | <i>rmlA</i>  | glucose-1-phosphate thymidyltransferase                     | essential | non       | essential | essential | -   | yes |

|                  |             |                                             |           |           |           |           |   |     |
|------------------|-------------|---------------------------------------------|-----------|-----------|-----------|-----------|---|-----|
| <b>SMU_1465c</b> | <i>dnaD</i> | DNA replication protein DnaD                | essential | essential | non       | essential | - | yes |
| <b>SMU_1474c</b> | <i>rnz</i>  | ribonuclease Z                              | essential | essential | essential | essential | - | yes |
| <b>SMU_15</b>    | <i>ftsH</i> | cell division protein FtsH                  | essential | non       | essential | non       | - | yes |
| <b>SMU_1510</b>  | <i>syfB</i> | phenylalanyl-tRNA synthetase, beta subunit  | essential | essential | essential | essential | - | yes |
| <b>SMU_1512</b>  | <i>syfA</i> | phenylalanyl-tRNA synthetase, alpha subunit | essential | non       | essential | essential | - | yes |
| <b>SMU_1528</b>  | <i>atpB</i> | ATPase beta subunit                         | essential | essential | essential | essential | - | yes |
| <b>SMU_1529</b>  | <i>atpC</i> | ATPase, gamma subunit                       | essential | essential | essential | essential | - | yes |
| <b>SMU_1530</b>  | <i>atpD</i> | ATP synthase alpha subunit                  | essential | essential | essential | essential | - | yes |
| <b>SMU_1534</b>  | <i>atpH</i> | ATPase, c subunit                           | essential | non       | non       | essential | - | yes |
| <b>SMU_1543</b>  | <i>dnlJ</i> | DNA ligase                                  | essential | essential | essential | essential | - | yes |
| <b>SMU_1573</b>  | <i>metK</i> | S-adenosylmethionine synthetase             | essential | essential | essential | essential | - | yes |
| <b>SMU_158</b>   | <i>cysS</i> | cysteinyl-tRNA synthetase                   | essential | non       | essential | essential | - | yes |
| <b>SMU_1581</b>  | <i>dnaX</i> | DNA polymerase III subunits gamma and tau   | essential | essential | essential | essential | - | yes |
| <b>SMU_1609c</b> | <i>secG</i> | preprotein translocase, SecG subunit        | essential | essential | essential | essential | - | yes |
| <b>SMU_1613c</b> | -           | dephospho-CoA kinase                        | essential | essential | essential | essential | - | yes |
| <b>SMU_1618</b>  | <i>dagK</i> | diacylglycerol kinase                       | non       | non       | essential | non       | - | yes |
| <b>SMU_1625</b>  | <i>pyrH</i> | uridylyate kinase (UMP-kinase)              | essential | essential | essential | essential | - | yes |
| <b>SMU_1626</b>  | <i>rl1</i>  | 50S ribosomal protein L1                    | essential | non       | essential | essential | - | yes |
| <b>SMU_1627</b>  | <i>rl11</i> | 50S ribosomal protein L11                   | essential | non       | non       | essential | - | yes |
| <b>SMU_1663</b>  | <i>kthY</i> | thymidylate kinase manganese-dependent      | essential | non       | essential | essential | - | yes |
| <b>SMU_1687</b>  | <i>ppaC</i> | inorganic pyrophosphatase (type II PPase)   | essential | essential | non       | essential | - | yes |
| <b>SMU_169</b>   | <i>rplM</i> | 50S ribosomal protein L13                   | essential | non       | non       | essential | - | yes |
| <b>SMU_1734</b>  | <i>accA</i> | acetyl-CoA carboxylase alpha subunit        | essential | essential | essential | essential | - | yes |

|                  |             |                                                                                           |           |           |           |           |           |     |
|------------------|-------------|-------------------------------------------------------------------------------------------|-----------|-----------|-----------|-----------|-----------|-----|
| <b>SMU_1735</b>  | <i>accD</i> | acetyl-CoA carboxylase beta subunit                                                       | essential | essential | essential | essential | -         | yes |
| <b>SMU_1736</b>  | <i>accC</i> | acetyl-CoA carboxylase biotin carboxylase subunit                                         | essential | essential | essential | essential | -         | yes |
| <b>SMU_1737</b>  | <i>fabZ</i> | (3R)-hydroxymyristoyl-(acyl carrier protein) dehydratase                                  | essential | essential | non       | essential | -         | yes |
| <b>SMU_1738</b>  | <i>bccP</i> | biotin carboxyl carrier protein of acetyl-CoA carboxylase                                 | essential | essential | essential | essential | -         | yes |
| <b>SMU_1740</b>  | <i>fabG</i> | 3-oxoacyl-acyl-carrier-protein reductase / 3-ketoacyl-acyl carrier protein reductase      | essential | essential | essential | essential | -         | yes |
| <b>SMU_1742c</b> | <i>fabK</i> | trans-2-enoyl-ACP reductase II                                                            | essential | essential | non       | essential | -         | yes |
| <b>SMU_1743</b>  | <i>acp</i>  | acyl carrier protein                                                                      | essential | non       | essential | essential | -         | yes |
| <b>SMU_1748</b>  | <i>akh</i>  | aspartate kinase / homoserine dehydrogenase                                               | non       | non       | non       | non       | essential | yes |
| <b>SMU_1783</b>  | <i>proS</i> | prolyl-tRNA synthetase phosphatidate                                                      | essential | essential | essential | essential | -         | yes |
| <b>SMU_1785</b>  | <i>cdsA</i> | cytidyltransferase (CDP-diglyceride synthase)                                             | essential | non       | essential | essential | -         | yes |
| <b>SMU_1799</b>  | <i>nadD</i> | nicotinate mononucleotide adenylyltransferase (nicotinate-nucleotide adenylyltransferase) | essential | essential | essential | non       | -         | yes |
| <b>SMU_18</b>    | -           | hypothetical protein                                                                      | non       | non       | non       | non       | non       | no  |
| <b>SMU_1801c</b> | -           | conserved hypothetical protein, GTP-binding                                               | non       | essential | non       | non       | -         | yes |
| <b>SMU_1802c</b> | -           | conserved hypothetical protein                                                            | essential | essential | essential | essential | -         | yes |
| <b>SMU_1819</b>  | <i>gatB</i> | glutamyl-tRNA (Gln) amidotransferase subunit B                                            | essential | essential | essential | essential | -         | yes |
| <b>SMU_1820c</b> | <i>gatA</i> | glutamyl-tRNA(Gln) amidotransferase subunit A                                             | essential | non       | essential | essential | -         | yes |

|                  |              |                                                                   |           |           |           |           |           |     |
|------------------|--------------|-------------------------------------------------------------------|-----------|-----------|-----------|-----------|-----------|-----|
| <b>SMU_1821c</b> | <i>gatC</i>  | glutamyl-tRNA (Gln) amidotransferase subunit C                    | essential | essential | essential | essential | -         | yes |
| <b>SMU_1834</b>  | <i>alr</i>   | alanine racemase                                                  | essential | essential | non       | essential | -         | yes |
| <b>SMU_1836</b>  | <i>aroG</i>  | phospho-2-dehydro-3-deoxyheptonate aldolase (DAHP synthase)       | non       | non       | non       | non       | essential | yes |
| <b>SMU_1837</b>  | <i>aroH</i>  | 3-deoxy-7-phosphoheptulonate synthase                             | non       | non       | non       | non       | essential | no  |
| <b>SMU_1852</b>  | -            | cation transporter, CorA family                                   | essential | non       | essential | non       | -         | yes |
| <b>SMU_1859</b>  | <i>ssb</i>   | single-stranded DNA-binding protein                               | essential | essential | non       | essential | -         | yes |
| <b>SMU_1860</b>  | <i>rs6</i>   | 30S ribosomal protein S6                                          | non       | non       | non       | essential | -         | yes |
| <b>SMU_1886</b>  | <i>sys</i>   | seryl-tRNA synthetase                                             | non       | essential | essential | essential | -         | yes |
| <b>SMU_1920</b>  | <i>pgdA</i>  | phosphoglycerate dehydrogenase                                    | essential | essential | essential | essential | -         | yes |
| <b>SMU_1921</b>  | <i>dnaI</i>  | DNA replication protein; primosome component                      | essential | essential | essential | essential | -         | yes |
| <b>SMU_1922</b>  | <i>dnaB</i>  | chromosome replication initiation and membrane attachment protein | essential | non       | essential | essential | -         | yes |
| <b>SMU_1943</b>  | <i>syl</i>   | leucyl-tRNA synthetase                                            | essential | non       | essential | essential | -         | yes |
| <b>SMU_1948</b>  | <i>secE</i>  | preprotein translocase, SecE subunit                              | essential | non       | non       | essential | -         | yes |
| <b>SMU_1954</b>  | <i>groEL</i> | chaperonin GroEL                                                  | non       | essential | essential | essential | -         | yes |
| <b>SMU_2000</b>  | <i>rl17</i>  | 50S ribosomal protein L17                                         | essential | non       | essential | essential | -         | yes |
| <b>SMU_2001</b>  | <i>rpoA</i>  | DNA-directed RNA polymerase, alpha subunit                        | essential | non       | essential | essential | -         | yes |
| <b>SMU_2004</b>  | <i>if1</i>   | translation initiation factor IF-1                                | essential | non       | essential | essential | -         | yes |

|                  |              |                                                                                 |           |           |           |           |           |     |
|------------------|--------------|---------------------------------------------------------------------------------|-----------|-----------|-----------|-----------|-----------|-----|
| <b>SMU_2005</b>  | <i>adk</i>   | adenylate kinase (ATP-AMP transphosphorylase) (superoxide-inducible protein 16) | essential | essential | non       | essential | -         | yes |
| <b>SMU_2006</b>  | <i>secY</i>  | preprotein translocase                                                          | essential | non       | essential | essential | -         | yes |
| <b>SMU_2007</b>  | <i>rl15</i>  | 50S ribosomal protein L15, N-terminal fragment                                  | essential | non       | non       | non       | -         | yes |
| <b>SMU_2008</b>  | <i>rl30</i>  | 50S ribosomal protein L30                                                       | essential | non       | essential | non       | -         | yes |
| <b>SMU_2010</b>  | <i>rl18</i>  | 50S ribosomal protein L18                                                       | non       | non       | non       | essential | -         | yes |
| <b>SMU_2012</b>  | <i>rs8</i>   | 30S ribosomal protein S8                                                        | essential | non       | non       | essential | -         | yes |
| <b>SMU_2014</b>  | <i>rs14</i>  | 30S ribosomal protein S14                                                       | essential | non       | non       | essential | -         | yes |
| <b>SMU_2015</b>  | <i>rl5</i>   | 50S ribosomal protein L5                                                        | essential | non       | non       | non       | -         | yes |
| <b>SMU_2016</b>  | <i>rl24</i>  | 50S ribosomal protein L24                                                       | essential | non       | non       | essential | -         | yes |
| <b>SMU_2017</b>  | <i>rl14</i>  | 50S ribosomal protein L14                                                       | essential | non       | non       | essential | -         | yes |
| <b>SMU_2018</b>  | <i>rs17</i>  | 30S ribosomal protein S17                                                       | essential | non       | non       | essential | -         | yes |
| <b>SMU_2019</b>  | <i>rl29</i>  | 50s ribosomal protein L29                                                       | essential | non       | non       | non       | -         | yes |
| <b>SMU_2020</b>  | <i>rl16</i>  | 50S ribosomal protein L16                                                       | essential | non       | essential | essential | -         | yes |
| <b>SMU_2021</b>  | <i>rs3</i>   | 30S ribosomal protein S3                                                        | essential | non       | essential | essential | -         | yes |
| <b>SMU_2022</b>  | <i>rl22</i>  | 50S ribosomal protein L22                                                       | essential | non       | essential | essential | -         | yes |
| <b>SMU_2023c</b> | <i>rps19</i> | 30S ribosomal protein S19, C-terminal fragment                                  | essential | non       | non       | essential | -         | yes |
| <b>SMU_2024c</b> | <i>rl4</i>   | 50S ribosomal protein L4, N-terminal fragment                                   | essential | non       | essential | essential | -         | yes |
| <b>SMU_2025</b>  | <i>rl3</i>   | 50S ribosomal protein L3                                                        | essential | non       | essential | essential | -         | yes |
| <b>SMU_2031</b>  | <i>eftS</i>  | translation elongation factor Ts                                                | essential | non       | essential | essential | -         | yes |
| <b>SMU_2032</b>  | <i>rs2</i>   | 30S ribosomal protein S2                                                        | non       | non       | essential | essential | -         | yes |
| <b>SMU_2093</b>  | <i>argR</i>  | arginine repressor                                                              | non       | non       | non       | non       | essential | yes |
| <b>SMU_2102</b>  | <i>hisS</i>  | histidine-tRNA synthetase                                                       | essential | non       | essential | essential | -         | yes |
| <b>SMU_2135c</b> | <i>rpsD</i>  | 30S Ribosomal protein S4                                                        | essential | non       | essential | essential | -         | yes |



|                |              |                                                                                      |           |           |           |           |           |     |
|----------------|--------------|--------------------------------------------------------------------------------------|-----------|-----------|-----------|-----------|-----------|-----|
| <b>SMU_415</b> | -            | conserved hypothetical protein, phosphotransferase enzyme family                     | essential | non       | essential | essential | -         | yes |
| <b>SMU_418</b> | <i>nusA</i>  | transcription termination-antitermination factor NusA; elongation factor             | non       | essential | essential | non       | -         | yes |
| <b>SMU_419</b> | -            | conserved hypothetical protein                                                       | essential | essential | non       | non       | -         | yes |
| <b>SMU_421</b> | <i>infB</i>  | translation initiation factor IF-2                                                   | essential | non       | essential | non       | -         | yes |
| <b>SMU_445</b> | <i>sygA</i>  | glycyl-tRNA synthetase alpha subunit                                                 | essential | essential | essential | essential | -         | yes |
| <b>SMU_446</b> | <i>sygB</i>  | glycyl tRNA synthetase beta subunit                                                  | essential | non       | essential | essential | -         | yes |
| <b>SMU_455</b> | <i>pbp2x</i> | penicillin-binding protein 2X                                                        | essential | essential | essential | essential | -         | yes |
| <b>SMU_456</b> | <i>mraY</i>  | phospho-N-acetylmuramoyl-pentapeptide-transferase                                    | essential | essential | essential | essential | -         | yes |
| <b>SMU_465</b> | <i>nadE</i>  | NAD(+) synthetase (nitrogen-regulatory protein)                                      | essential | non       | essential | essential | -         | yes |
| <b>SMU_471</b> | -            | conserved hypothetical protein                                                       | non       | non       | non       | non       | essential | yes |
| <b>SMU_478</b> | <i>kguA</i>  | guanylate kinase                                                                     | essential | non       | essential | essential | -         | yes |
| <b>SMU_481</b> | <i>fmt</i>   | methionyl-tRNA formyltransferase                                                     | essential | essential | essential | essential | -         | yes |
| <b>SMU_517</b> | <i>coaD</i>  | phosphopantetheine adenylyltransferase; lipopolysaccharide core biosynthesis protein | essential | essential | essential | essential | -         | yes |
| <b>SMU_548</b> | <i>murD</i>  | D-glutamic acid adding enzyme MurD; UDP-N-acetylmuramoylalanine--D-glutamate ligase  | essential | essential | essential | essential | -         | yes |
| <b>SMU_551</b> | <i>ftsA</i>  | cell division protein FtsA                                                           | essential | essential | essential | non       | -         | yes |

|                 |             |                                                                                                   |           |           |           |           |           |     |
|-----------------|-------------|---------------------------------------------------------------------------------------------------|-----------|-----------|-----------|-----------|-----------|-----|
| <b>SMU_558</b>  | <i>ileS</i> | isoleucine-tRNA synthetase                                                                        | essential | essential | essential | essential | -         | yes |
| <b>SMU_589</b>  | <i>hlpA</i> | histone-like DNA-binding protein                                                                  | essential | essential | non       | essential | -         | yes |
| <b>SMU_596</b>  | <i>pmgY</i> | phosphoglycerate mutase D-Ala-D-Ala adding enzyme; UDP-N-acetylmuramoylalanyl-D-                  | essential | non       | non       | essential | -         | yes |
| <b>SMU_603</b>  | <i>murF</i> | glutamyl-2,6-diaminopimelate-D-alanyl-D-alanyl ligase (UDP-N-acetylmuramyl pentapeptide synthase) | essential | essential | essential | essential | -         | yes |
| <b>SMU_628</b>  | <i>holA</i> | DNA polymerase III, delta subunit                                                                 | essential | non       | essential | essential | -         | yes |
| <b>SMU_629</b>  | <i>sod</i>  | superoxide dismutase                                                                              | non       | non       | non       | non       | essential | yes |
| <b>SMU_650</b>  | <i>alaS</i> | alanyl-tRNA synthetase (alanine--tRNA ligase)                                                     | essential | non       | essential | essential | -         | yes |
| <b>SMU_667</b>  | <i>nrdB</i> | ribonucleotide reductase, small subunit                                                           | essential | non       | non       | essential | -         | yes |
| <b>SMU_668c</b> | <i>nrdA</i> | ribonucleotide reductase, large subunit                                                           | essential | essential | non       | essential | -         | yes |
| <b>SMU_675</b>  | <i>ptsl</i> | phosphoenolpyruvate-protein phosphotransferase (enzyme I)                                         | essential | non       | non       | non       | -         | yes |
| <b>SMU_697</b>  | <i>infC</i> | translation initiation factor IF-3                                                                | essential | essential | non       | essential | -         | yes |
| <b>SMU_699</b>  | <i>rplT</i> | 50S ribosomal protein L20                                                                         | essential | non       | non       | essential | -         | yes |
| <b>SMU_70</b>   | <i>thrC</i> | threonine synthase                                                                                | non       | non       | non       | non       | essential | yes |
| <b>SMU_712</b>  | <i>capP</i> | phosphoenolpyruvate carboxylase                                                                   | non       | non       | non       | non       | essential | yes |
| <b>SMU_713</b>  | <i>ftsW</i> | cell division protein                                                                             | essential | essential | essential | essential | -         | yes |
| <b>SMU_714</b>  | <i>tuf</i>  | translation elongation factor Tu                                                                  | essential | non       | essential | essential | -         | yes |
| <b>SMU_715</b>  | <i>tpiA</i> | triosephosphate isomerase                                                                         | essential | essential | non       | essential | -         | yes |

|                 |      |                                                                                                        |           |           |           |           |           |     |
|-----------------|------|--------------------------------------------------------------------------------------------------------|-----------|-----------|-----------|-----------|-----------|-----|
| <b>SMU_716</b>  | murN | peptidoglycan branched peptide synthesis protein, alanine adding enzyme; methicillin resistance factor | non       | non       | essential | non       | -         | yes |
| <b>SMU_738</b>  | -    | hypothetical protein                                                                                   | non       | non       | non       | non       | non       | no  |
| <b>SMU_754</b>  | -    | HPr (serine) kinase/phosphatase                                                                        | essential | non       | essential | non       | -         | yes |
| <b>SMU_766</b>  | -    | transposase                                                                                            | non       | non       | non       | non       | non       | no  |
| <b>SMU_773c</b> | lysS | lysyl-tRNA synthetase                                                                                  | essential | essential | essential | essential | -         | yes |
| <b>SMU_777</b>  | aroD | 3-dehydroquinate dehydratase                                                                           | non       | non       | non       | non       | essential | yes |
| <b>SMU_778</b>  | aroE | shikimate 5-dehydrogenase                                                                              | non       | non       | non       | non       | essential | yes |
| <b>SMU_779</b>  | aroB | 3-dehydroquinate synthase                                                                              | non       | non       | non       | non       | essential | yes |
| <b>SMU_780</b>  | aroC | chorismate synthase                                                                                    | non       | non       | non       | non       | essential | yes |
| <b>SMU_784</b>  | aroA | 3-phosphoshikimate 1-carboxyvinyltransferase (5-enolpyruvylshikimate-3-phosphate synthase)             | non       | non       | non       | non       | essential | yes |
| <b>SMU_785</b>  | aroK | shikimate kinase                                                                                       | non       | non       | non       | non       | essential | yes |
| <b>SMU_801</b>  | obg  | GTP-binding protein, GTP1/Obg family                                                                   | essential | essential | essential | essential | -         | yes |
| <b>SMU_81</b>   | grpE | co-chaperone protein GrpE                                                                              | essential | non       | essential | non       | -         | yes |
| <b>SMU_821</b>  | dnaG | DNA primase                                                                                            | essential | essential | essential | essential | -         | yes |
| <b>SMU_822</b>  | rpoD | RNA polymerase sigma-70 factor                                                                         | essential | essential | essential | essential | -         | yes |
| <b>SMU_824</b>  | rmID | dTDP-4-keto-L-rhamnose reductase                                                                       | essential | non       | essential | non       | -         | yes |
| <b>SMU_827</b>  | rgpC | polysaccharide ABC transporter membrane-spanning protein                                               | non       | non       | essential | non       | -         | yes |
| <b>SMU_830</b>  | rgpF | polysaccharide biosynthesis protein                                                                    | non       | non       | essential | non       | -         | yes |

|                 |      |                                                          |           |           |           |           |           |     |
|-----------------|------|----------------------------------------------------------|-----------|-----------|-----------|-----------|-----------|-----|
| <b>SMU_846</b>  | rplU | Ribosomal protein L21-within SMU_847c on opposite strand | essential | non       | non       | non       | -         | yes |
| <b>SMU_849</b>  | rpmA | 50S ribosomal protein L27                                | essential | non       | non       | essential | -         | yes |
| <b>SMU_868</b>  | trmD | tRNA (guanine-N1)-methyltransferase                      | non       | essential | essential | essential | -         | no  |
| <b>SMU_939</b>  | fni  | isopentenyl-diphosphate delta-isomerase                  | non       | non       | essential | essential | -         | yes |
| <b>SMU_942</b>  | mvaA | 3-hydroxy-3-methylglutaryl-CoA reductase                 | essential | essential | non       | essential | -         | no  |
| <b>SMU_943c</b> | hmcM | hydroxymethylglutaryl-CoA synthase                       | essential | essential | essential | essential | -         | no  |
| <b>SMU_947</b>  | dfrA | dihydrofolate reductase                                  | essential | essential | essential | essential | -         | no  |
| <b>SMU_950</b>  | era  | GTP-binding protein                                      | essential | essential | essential | essential | -         | no  |
| <b>SMU_957</b>  | rplJ | 50S ribosomal protein L10                                | essential | non       | essential | non       | -         | no  |
| <b>SMU_959c</b> | -    | hypothetical protein                                     | non       | non       | non       | non       | non       | no  |
| <b>SMU_960</b>  | rpl  | 50S ribosomal protein L7/L12                             | essential | non       | non       | essential | -         | no  |
| <b>SMU_965</b>  | hom  | homoserine dehydrogenase                                 | non       | non       | non       | non       | essential | no  |
| <b>SMU_966</b>  | thrB | homoserine kinase                                        | non       | non       | non       | non       | essential | no  |
| <b>SMU_97</b>   | pyrG | CTP synthetase                                           | essential | non       | non       | non       | -         | yes |
| <b>SMU_989</b>  | asd  | aspartate-semialdehyde dehydrogenase                     | non       | non       | non       | non       | essential | no  |
| <b>SMU_99</b>   | fbaA | fructose-bisphosphate aldolase                           | essential | essential | essential | essential | -         | yes |
| <b>SMU_993</b>  | ylqL | GTP-binding protein                                      | non       | non       | non       | non       | essential | no  |

<sup>a</sup>Essential genes not conserved among the streptococci strains were compared against the rest of the essential genomes stored in the DEG

<sup>b</sup>A gene is defined as being in the accessory genome if only 1 of the 67 sequenced strains lacks the gene
