# Supplementary material for: Genomewide Identification of Essential Genes and Fitness Determinants of Streptococcus mutans UA159
Source: PubMed Central journal article supplement (PMC5806208; doi:10.1128/msphere.00031-18), 2018-02-07
Supplement: sph001182474st4.pdf [file sph001182474st4.pdf]

**Table S4**

| <b>Strain or plasmid</b>    | <b>Genotype or description</b>                                                                                              | <b>Reference</b> |
|-----------------------------|-----------------------------------------------------------------------------------------------------------------------------|------------------|
| <i>Streptococcus mutans</i> |                                                                                                                             |                  |
| UA159                       | Wild-type                                                                                                                   | ATCC<br>700610   |
| $\Delta clpP$               | clpP::km                                                                                                                    | (1)              |
| $\Delta sufC$               | sufC::km                                                                                                                    | (2)              |
| $\Delta rpmH$               | SMu.340::km                                                                                                                 | (2)              |
| $\Delta pppL$               | pppL::km                                                                                                                    | This work        |
| $\Delta pknB$               | pknB::km                                                                                                                    | (2)              |
| $\Delta divIB$              | divIB::km                                                                                                                   | (2)              |
| $\Delta ltaS$               | Smu.831::km                                                                                                                 | (2)              |
| $\Delta rgpl$               | Smu.833::km                                                                                                                 | (2)              |
| $\Delta 852$                | SMu.852::km                                                                                                                 | This work        |
| $\Delta 1542$               | Smu.1542c::km                                                                                                               | (2)              |
| $\Delta dltA$               | dltA::km                                                                                                                    | (2)              |
| $\Delta scrB$               | scrB::km                                                                                                                    | (3)              |
| $\Delta vicK$               | vicK::km                                                                                                                    | (4)              |
| $\Delta sodA$               | sodA::km                                                                                                                    | This work        |
| Plasmids                    |                                                                                                                             |                  |
| pALH124                     | Non-polar kanamycin cassette                                                                                                | (5)              |
| pMalC9                      | Plasmid that expresses the mariner transposase, MarC9, fused to an N-terminal maltose binding protein to allow purification | (6)              |
| pMagellan6                  | Magellan6 transposon is carried on this plasmid, including a spectinomycin resistance gene ( <i>aad9</i> )                  | (7)              |

## REFERENCES

1. Lemos JAC, Burne RA. 2002. Regulation and Physiological Significance of ClpC and ClpP in *Streptococcus mutans*. J Bacteriol 184:6357–66.
2. Shields RC, O'Brien G, Maricic N, Kesterson A, Grace M, Hagen SJ, Burne RA. 2018. Genome-wide screens reveal new gene products that influence genetic competence in *Streptococcus mutans*. J Bacteriol 200:16 e00508-17.
3. Zeng L, Burne RA. 2013. Comprehensive mutational analysis of sucrose-metabolizing pathways in *Streptococcus mutans* reveals novel roles for the sucrose phosphotransferase system permease. J Bacteriol 195:833–43.
4. Ahn S-J, Burne RA. 2007. Effects of oxygen on biofilm formation and the AtlA autolysin of *Streptococcus mutans*. J Bacteriol 189:6293–302.
5. Ahn S-J, Burne RA. 2006. The *atlA* operon of *Streptococcus mutans*: role in autolysin maturation and cell surface biogenesis. J Bacteriol 188:6877–88.
6. Lampe DJ, Akerley BJ, Rubin EJ, Mekalanos JJ, Robertson HM. 1999. Hyperactive transposase mutants of the Himar1 mariner transposon. Proc Natl Acad Sci U S A 96:11428–33.
7. van Opijnen T, Bodi KL, Camilli A. 2009. Tn-seq: high-throughput parallel sequencing for fitness and genetic interaction studies in microorganisms. Nat Methods 6:767–72.
