# Supplementary material for: Genomewide Identification of Essential Genes and Fitness Determinants of Streptococcus mutans UA159
Source: PubMed Central journal article supplement (PMC5806208; doi:10.1128/msphere.00031-18), 2018-02-07
Supplement: sph001182474st5.pdf [file sph001182474st5.pdf]

**Table S5**

| <b>Primer</b>  | <b>Sequence (5' to 3')<sup>a,b,c</sup></b>     | <b>Reference</b> |
|----------------|------------------------------------------------|------------------|
| <b>Tn-seq</b>  |                                                |                  |
| TnseqBarcode1A | TTCCCTACACGACGCTCTTCCGATCT<br>TATAGCCT NN      | This work        |
| TnseqBarcode1B | p-AGGCTATA<br>AGATCGGAAGAGCGTCGTGTAGGGAAAGAG-p | This work        |
| TnseqBarcode2A | TTCCCTACACGACGCTCTTCCGATCT<br>ATAGAGGC NN      | This work        |
| TnseqBarcode2B | p-GCCTCTAT<br>AGATCGGAAGAGCGTCGTGTAGGGAAAGAG-p | This work        |
| TnseqBarcode3A | TTCCCTACACGACGCTCTTCCGATCT<br>CCTATCCT NN      | This work        |
| TnseqBarcode3B | p-AGGATAGG<br>AGATCGGAAGAGCGTCGTGTAGGGAAAGAG-p | This work        |
| TnseqBarcode4A | TTCCCTACACGACGCTCTTCCGATCT<br>GGCTCTGA NN      | This work        |
| TnseqBarcode4B | p-TCAGAGCC<br>AGATCGGAAGAGCGTCGTGTAGGGAAAGAG-p | This work        |
| TnseqBarcode5A | TTCCCTACACGACGCTCTTCCGATCT<br>AGGCGAAG NN      | This work        |
| TnseqBarcode5B | p-CTTCGCCT<br>AGATCGGAAGAGCGTCGTGTAGGGAAAGAG-p | This work        |
| TnseqBarcode6A | TTCCCTACACGACGCTCTTCCGATCT TAATCTTA NN         | This work        |
| TnseqBarcode6B | p-TAAGATTA<br>AGATCGGAAGAGCGTCGTGTAGGGAAAGAG-p | This work        |
| TnseqBarcode7A | TTCCCTACACGACGCTCTTCCGATCT<br>CAGGACGT NN      | This work        |
| TnseqBarcode7B | p-ACGTCCTG<br>AGATCGGAAGAGCGTCGTGTAGGGAAAGAG-p | This work        |
| TnseqBarcode8A | TTCCCTACACGACGCTCTTCCGATCT<br>GTA CTGAC NN     | This work        |

|                                  |                                                                                 |           |
|----------------------------------|---------------------------------------------------------------------------------|-----------|
| TnseqBarcode8B                   | p-GTCAGTAC<br>AGATCGGAAGAGCGTCGTGTAGGGAAAGAG-p                                  | This work |
| P1_M6_MmeI                       | CAA GCA GAA GAC GGC ATA CGA AGA CCG GGG<br>ACT TAT CAT CCA ACC TGT              | (F)       |
| ADPT-Tnseq-PCRPrimer             | AAT GAT ACG GCG ACC ACC GAG ATC TAC ACT<br>CTT TCC CTA CAC GAC GCT CTT CCG ATCT | (F)       |
| Genomic DNA Sequencing<br>Primer | ACA CTC TTT CCC TAC ACG ACG CTC TTC CGA<br>TCT                                  | (F)       |

---

### Mutagenesis

#### *Streptococcus mutans*

|           |                                 |           |
|-----------|---------------------------------|-----------|
| SMu.483cA | AAGCCGCAAAAATTAGATGC            | This work |
| SMu.483cB | ATGCGGATCCCATGCCATCTGCCAATACAA  | This work |
| SMu.483cC | ATGCGGATCCCTGAAAAAGCCAAGCATTGGA | This work |
| SMu.483cD | CCGTTCCATCTTTGGTCAGT            | This work |
| SMu.483cE | ATTTGACGACAGGCCAGATT            | This work |
| SMu.483cF | GCGCCTGTTCAGGAGATAAG            | This work |
| SMu.852A  | CGAGGCAAAGAGCAAGATTC            | This work |
| SMu.852B  | CGATGGATCCCAAAGTGGGCTGACTGACAA  | This work |
| SMu.852C  | CGATGGATCCCTTATCCACGTGTGCTCTCAA | This work |
| SMu.852D  | ATCAGCCAAAGCCTTATCCA            | This work |
| SMu.852E  | ATTGGCTAAGTGCCAGCAAG            | This work |
| SMu.852F  | CAGCGACATCCTCATCTTCA            | This work |
| SMu.689A  | TGCGTCTTCAGGGAGAAGAT            | This work |
| SMu.689B  | ATGCGGATCCAGGGTCATCGTTTCAGCATC  | This work |
| SMu.689C  | ATGCGGATCCCTTGGAACTGTTGCTCGTC   | This work |
| SMu.689D  | GGACCCTTAGCAGAATAACAAGA         | This work |
| SMu.689E  | TCAGTGAGGCTATTCCAAGA            | This work |
| SMu.689F  | GGTTCACTTGATTGCGGGAGT           | This work |

<sup>a</sup>N indicates a degenerate base that could be either A, C, G, or T

<sup>b</sup>p indicates that the base adjacent has a phosphorylation modification

<sup>c</sup>underlined sequences indicate restriction enzyme recognition sites

## REFERENCE

1. van Opijnen T, Camilli A. 2010. Genome-wide fitness and genetic interactions determined by Tn-seq, a high-throughput massively parallel sequencing method for microorganisms. *Curr Protoc Microbiol* Chapter 1:Unit1E.3.
